# Supplementary material for: Diversity-oriented synthetic strategy for developing a chemical modulator of protein–protein interaction
Source: PubMed Central journal article supplement (PMC5078997; doi:10.1038/ncomms13196), 2016-10-24
Supplement: ncomms13196-s1.pdf [file ncomms13196-s1.pdf]

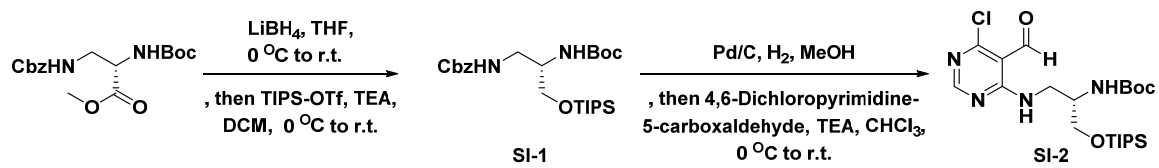

**Supplementary Figure 1.** Synthetic procedure for the *tert*-butyl (*S*)-(1-((6-chloro-5-formylpyrimidin-4-yl)amino)-3-((triisopropylsilyl)oxy)propan-2-yl)carbamate (**SI-2**)

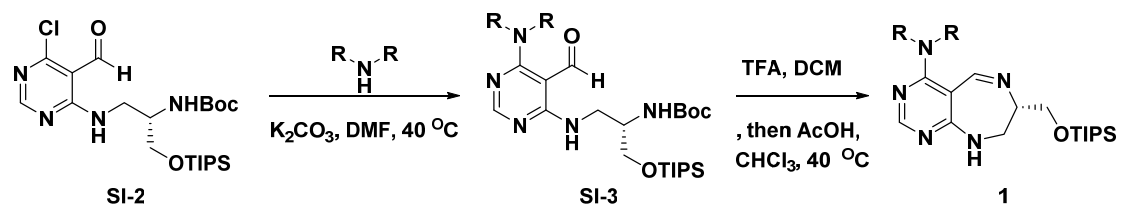

**Supplementary Figure 2.** General procedure for the preparation of **1a–c** and **1e–f**.

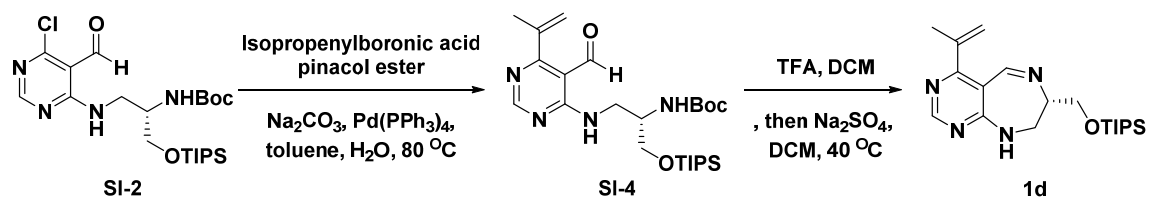

**Supplementary Figure 3.** Synthetic procedure for the preparation of (*S*)-4-(prop-1-en-2-yl)-7-(((triisopropylsilyl)oxy)methyl)-8,9-dihydro-7H-pyrimido[4,5-*e*][1,4]diazepine (**1d**).

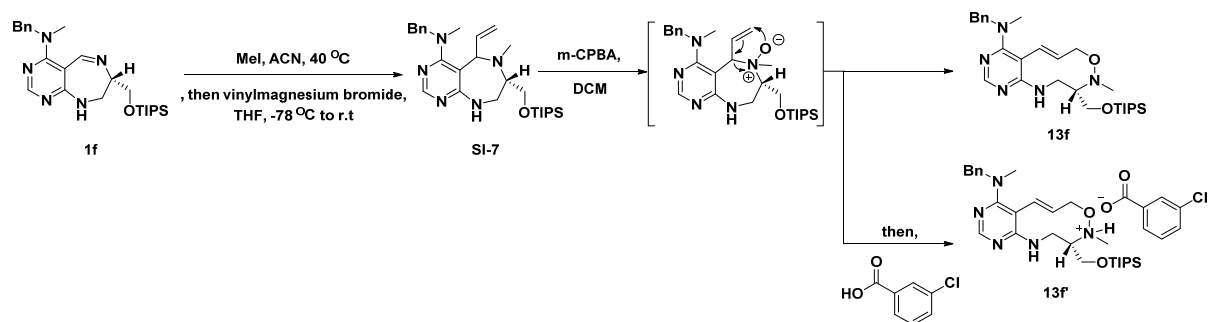

**Supplementary Figure 4.** Synthetic procedure for the preparation of **13f** and **13f'**.

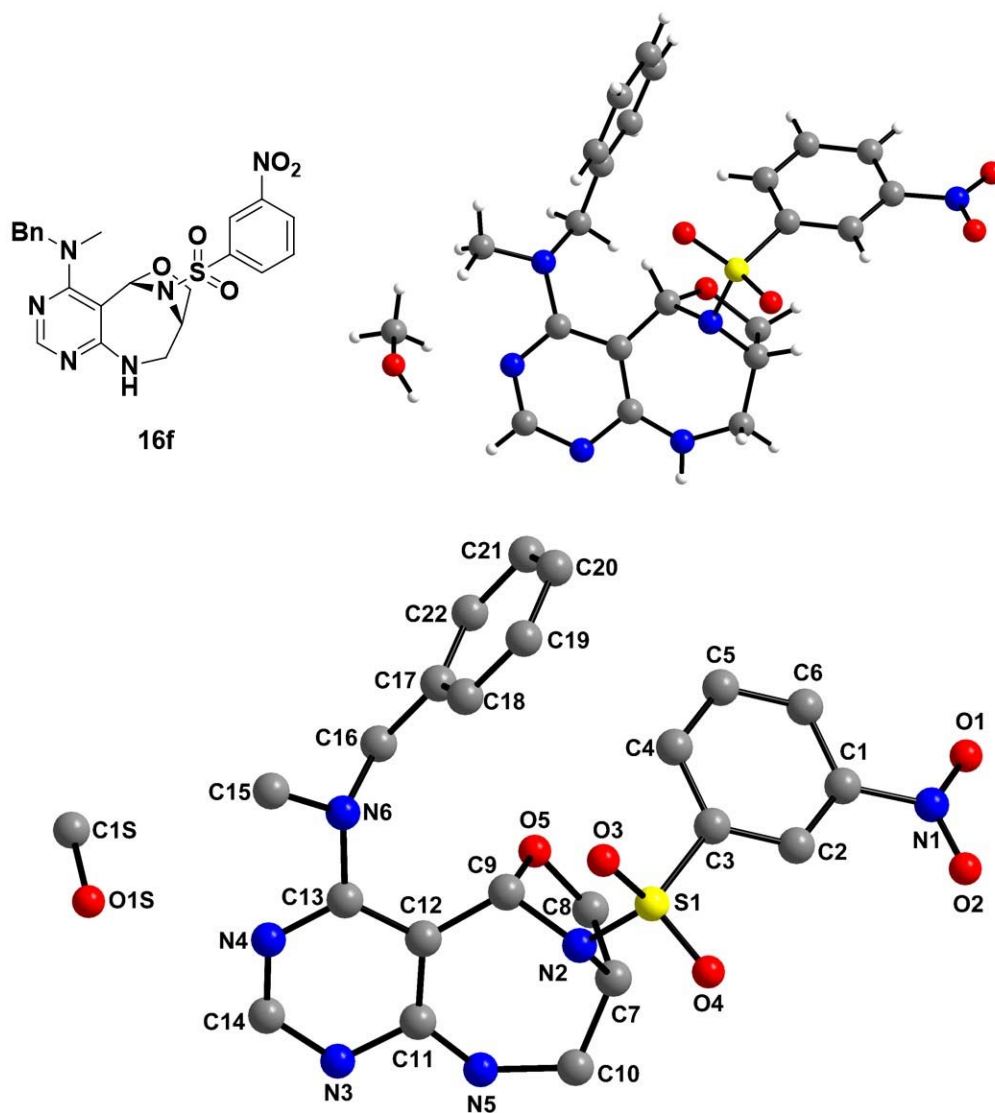

**Supplementary Figure 5.** X-ray structure of **16f**. Deposition number in Cambridge Structural Database: CCDC1500586.

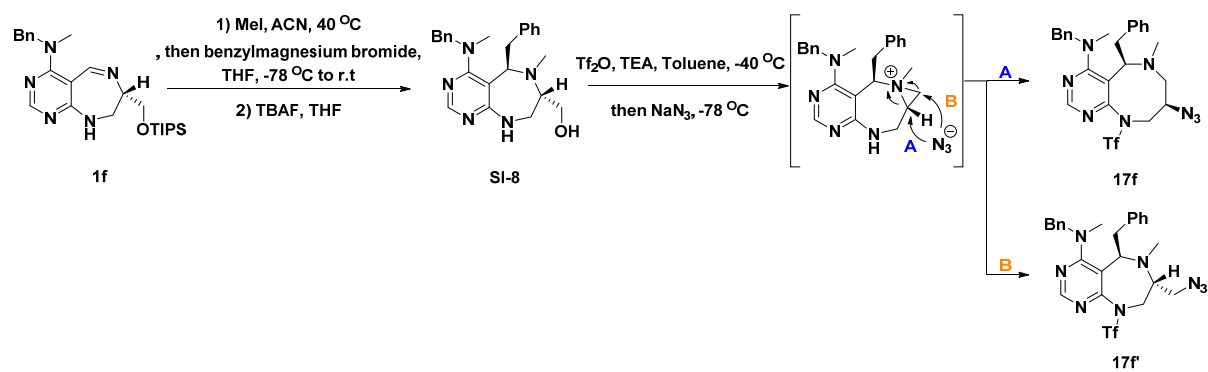

**Supplementary Figure 6.** Synthetic procedure for the preparation of **17f** and **17f'**.

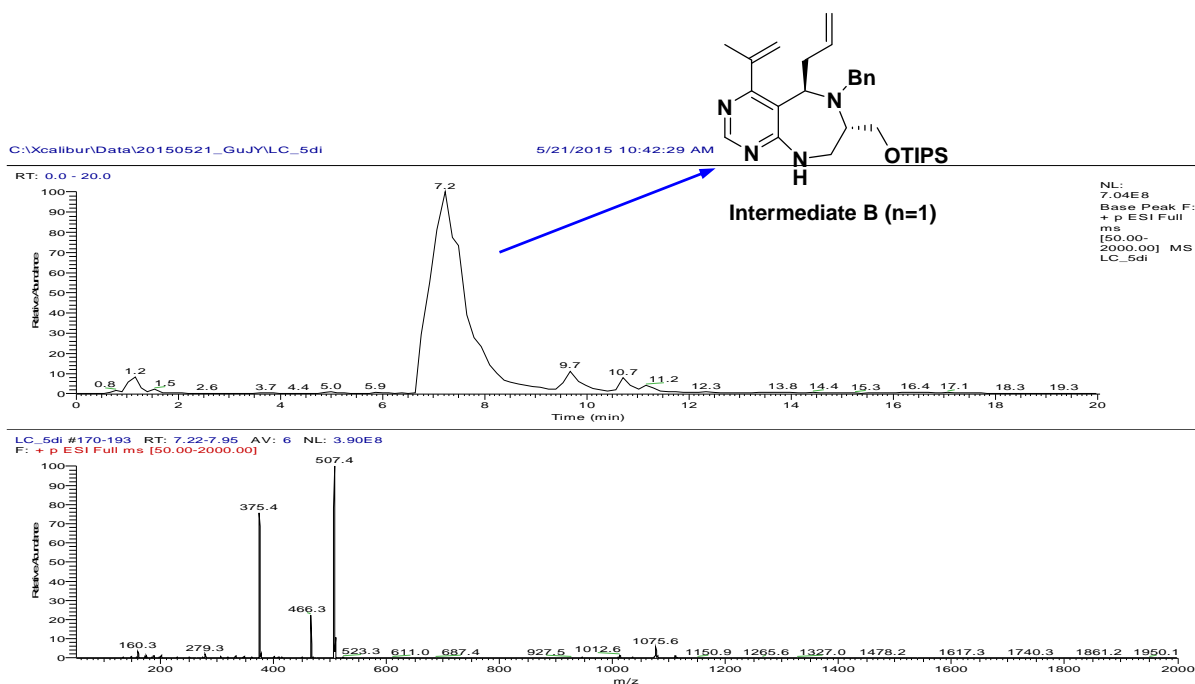

**Supplementary Figure 7.** LC-MS analysis of the crude reaction mixtures (**Intermediate B** (n=1)) for the determination of diastereomeric ratio (d.r. >99:1).

C:\Xcalibur\Data\20150521\_GuJYLC\_6di

5/21/2015 11:03:13 AM

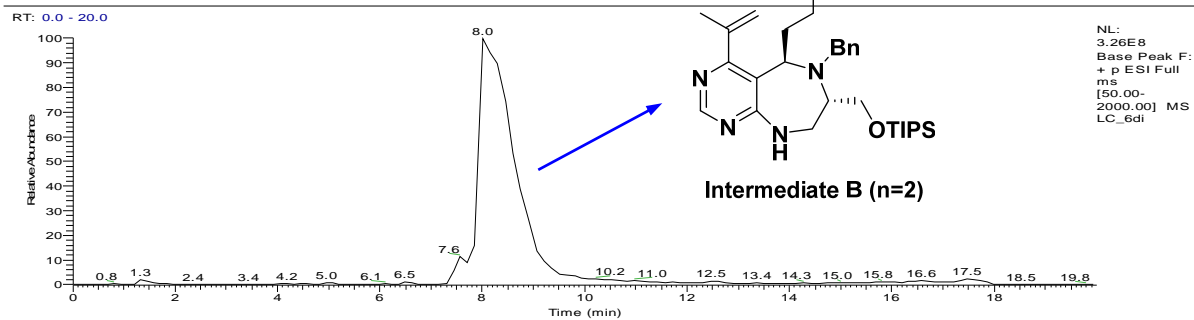

LC\_6di #187-210 RT: 8.15-8.90 AV: 6 NL: 2.04E8

F: + p ESI Full ms [50.00-2000.00]

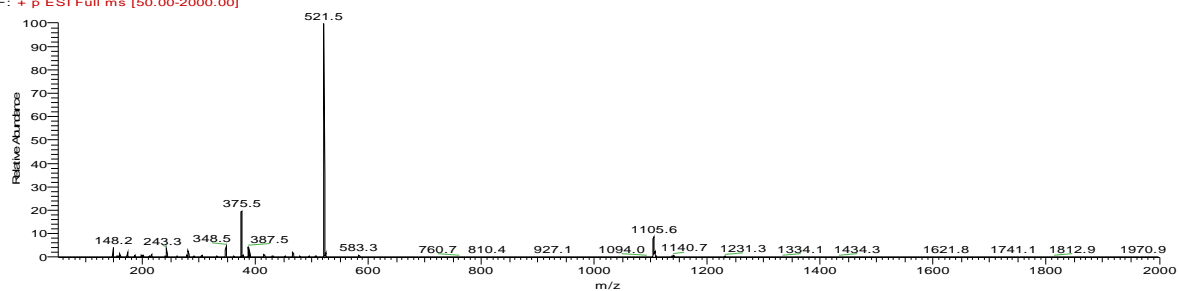

**Supplementary Figure 8.** LC-MS analysis of the crude reaction mixtures (**Intermediate B** (n=2)) for the determination of diastereomeric ratio (d.r. >99:1).



RT: 12.26 - 18.01 SM: 7B

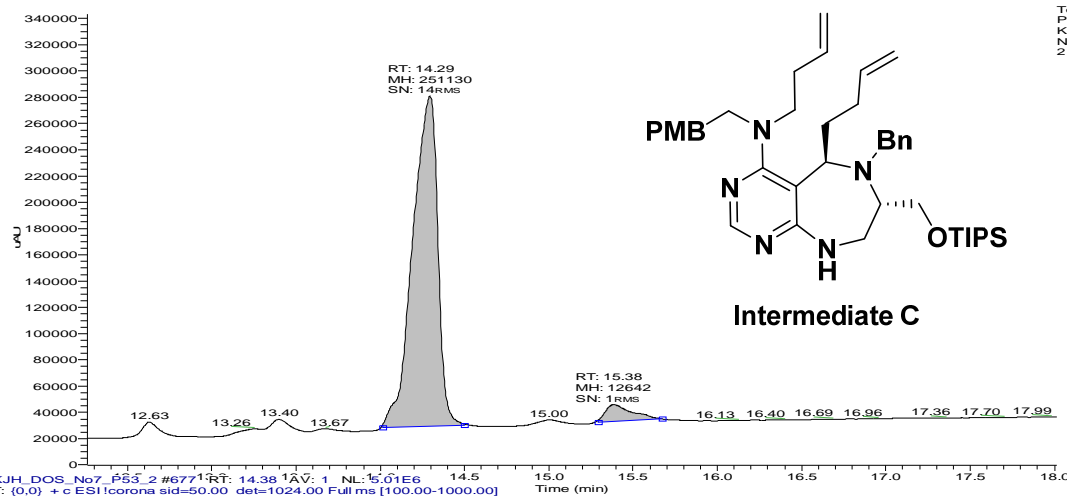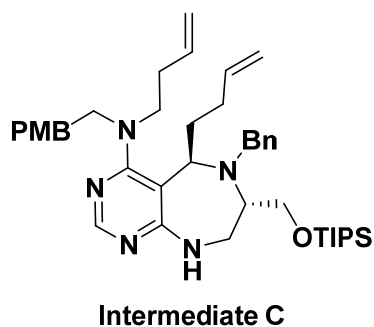

NL:  
2.81E5  
Total Scan  
PDA  
KJH\_DOS\_  
No7\_P53\_  
2

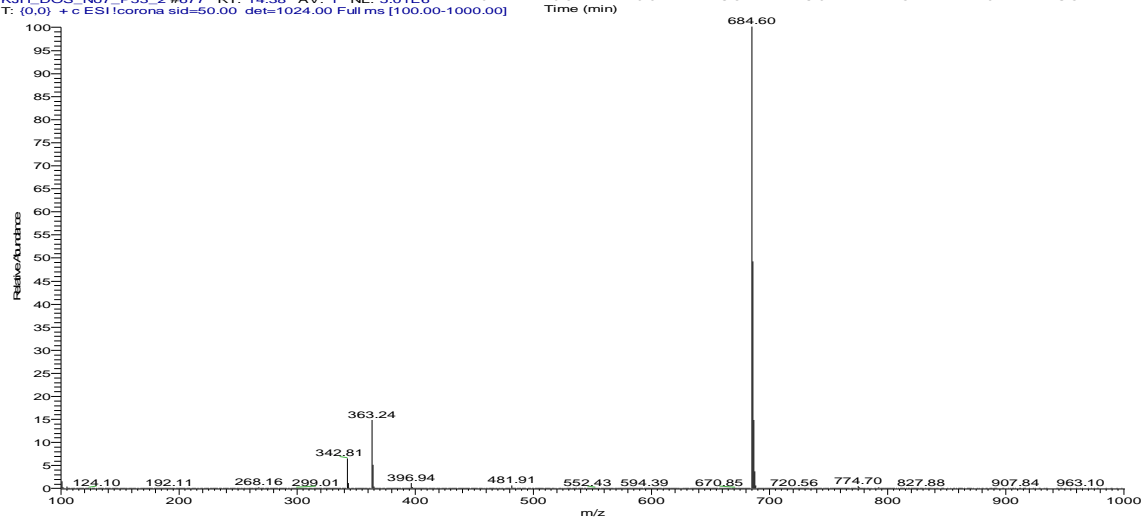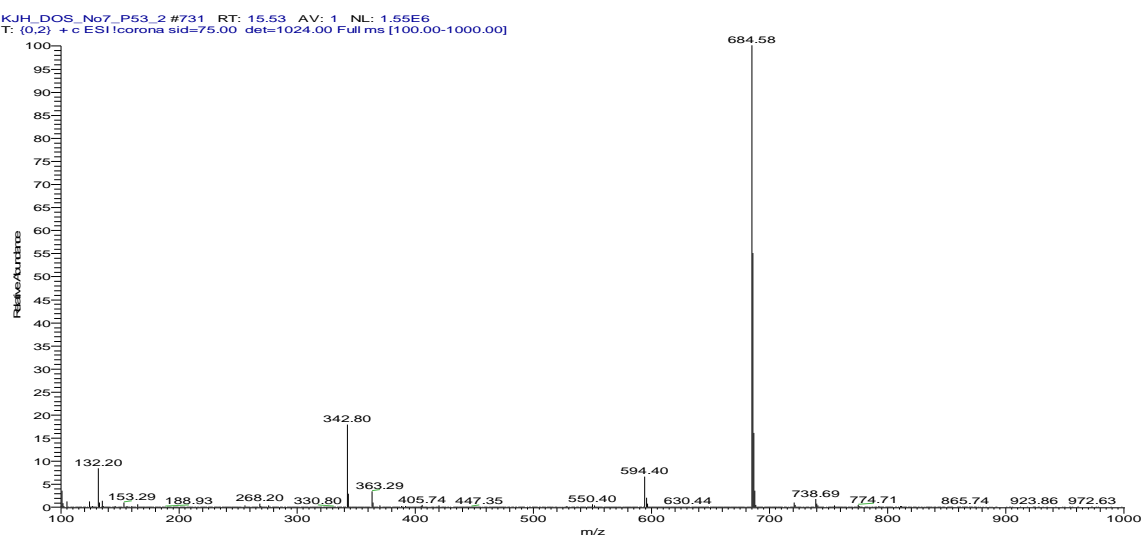

**Supplementary Figure 9.** LC-MS analysis of the crude reaction mixtures (**Intermediate C**) for the determination of diastereomeric ratio (d.r. 95:5).

RT: 10.63 - 16.16 SM: 7B

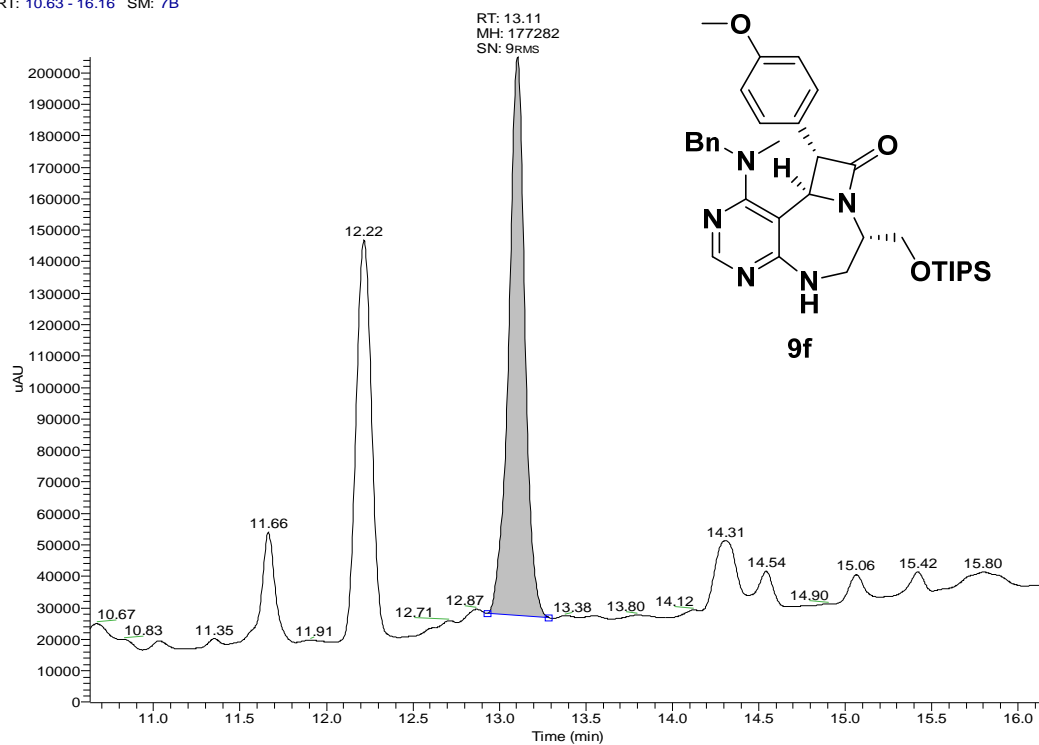

JAE-IV-43\_rh\_35min #621 RT: 13.19 AV: 1 NL: 1.25E6  
T: (0,0) + c ESI Icorona sid=50.00 det=1024.00 Full ms [100.00-1000.00]

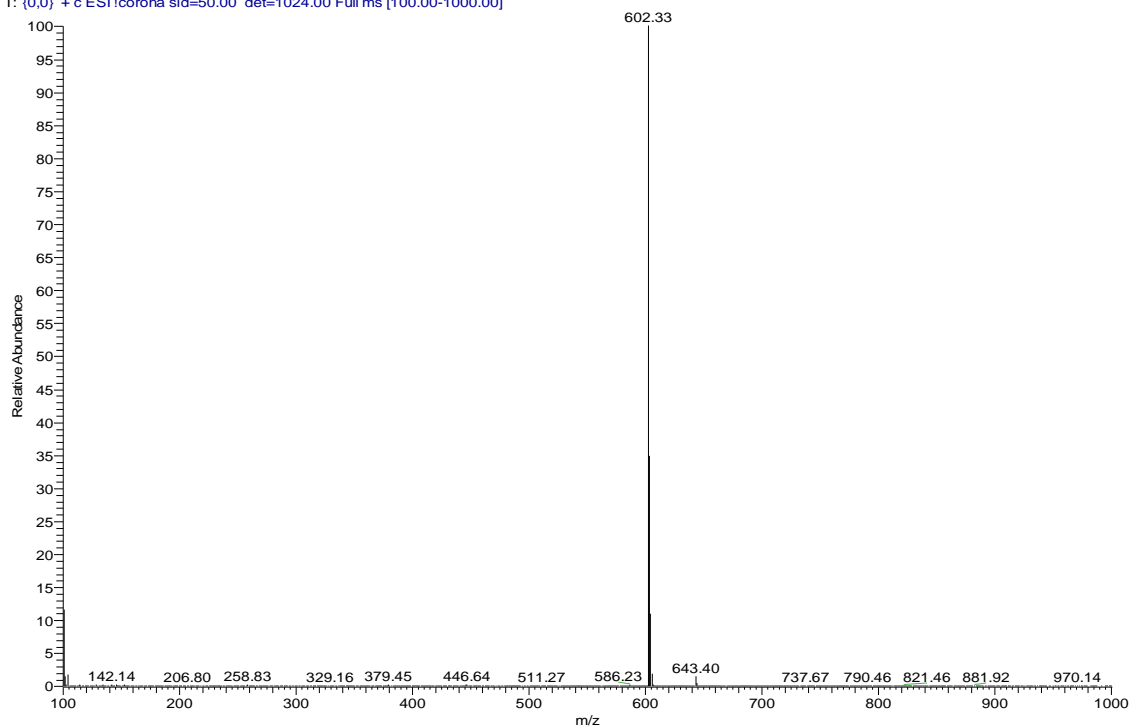

**Supplementary Figure 10.** LC-MS analysis of the crude reaction mixtures (**9f**) for the determination of diastereomeric ratio (d.r. >99:1).

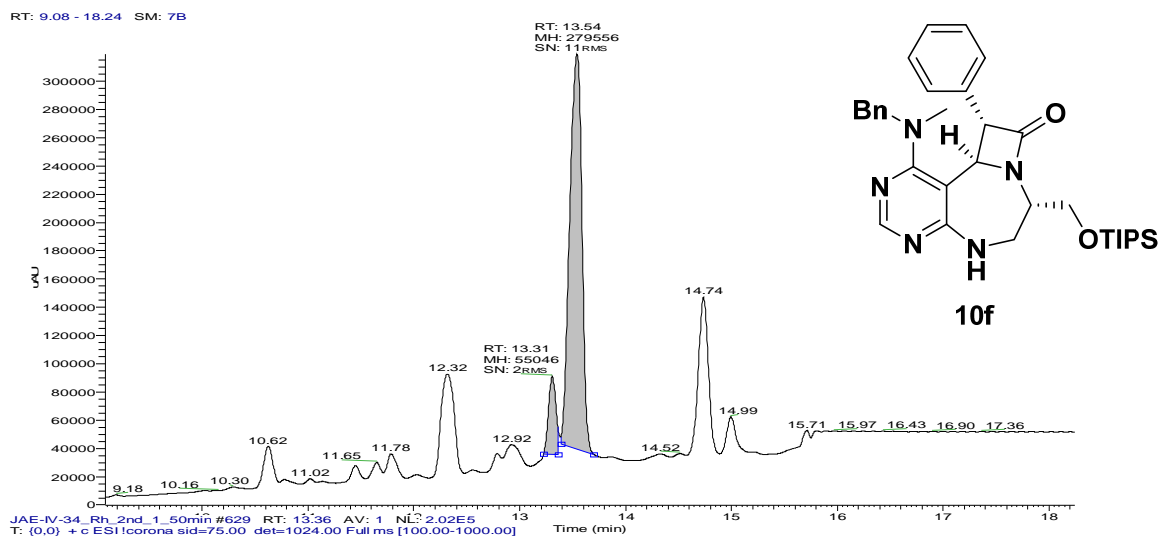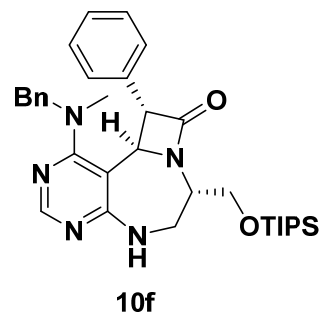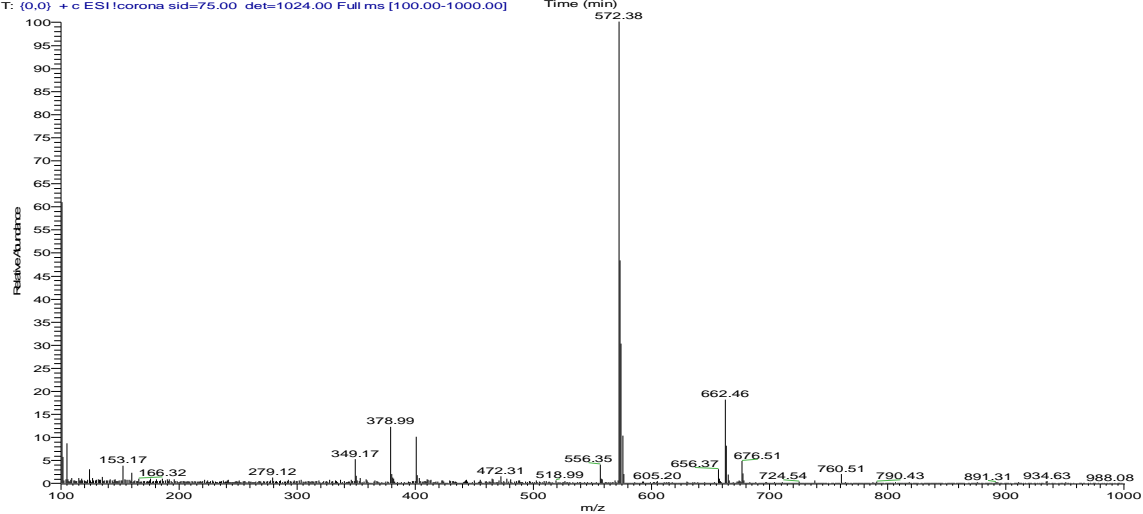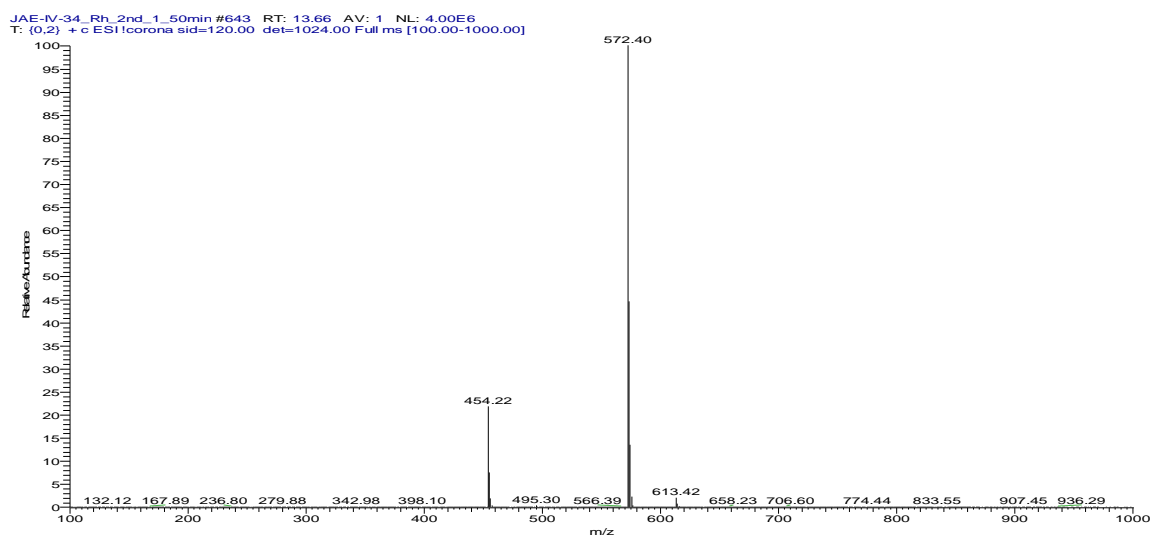

**Supplementary Figure 11.** LC-MS analysis of the crude reaction mixtures (**10f**) for the determination of diastereomeric ratio (d.r. 90:10).

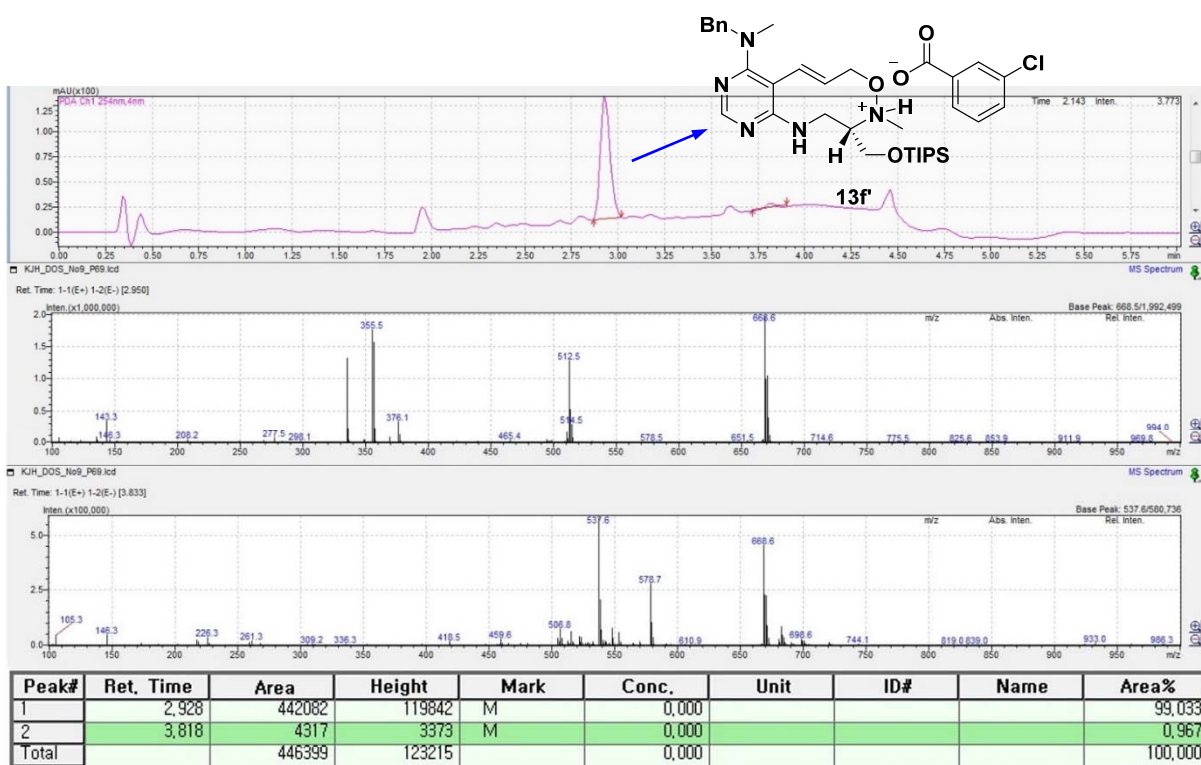

**Supplementary Figure 12.** LC-MS analysis of the crude reaction mixtures (**13f'**) for the determination of E/Z ratio (99:1).

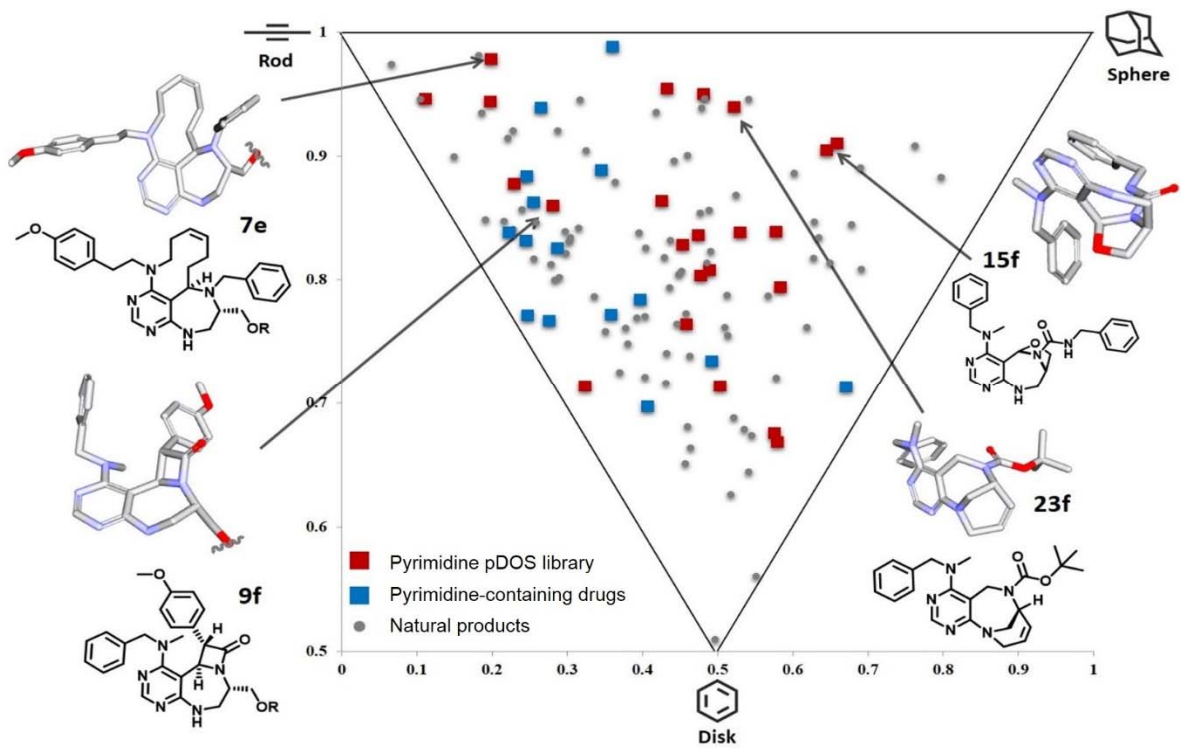

**Supplementary Figure 13.** Principal moment of inertia (PMI) plot.

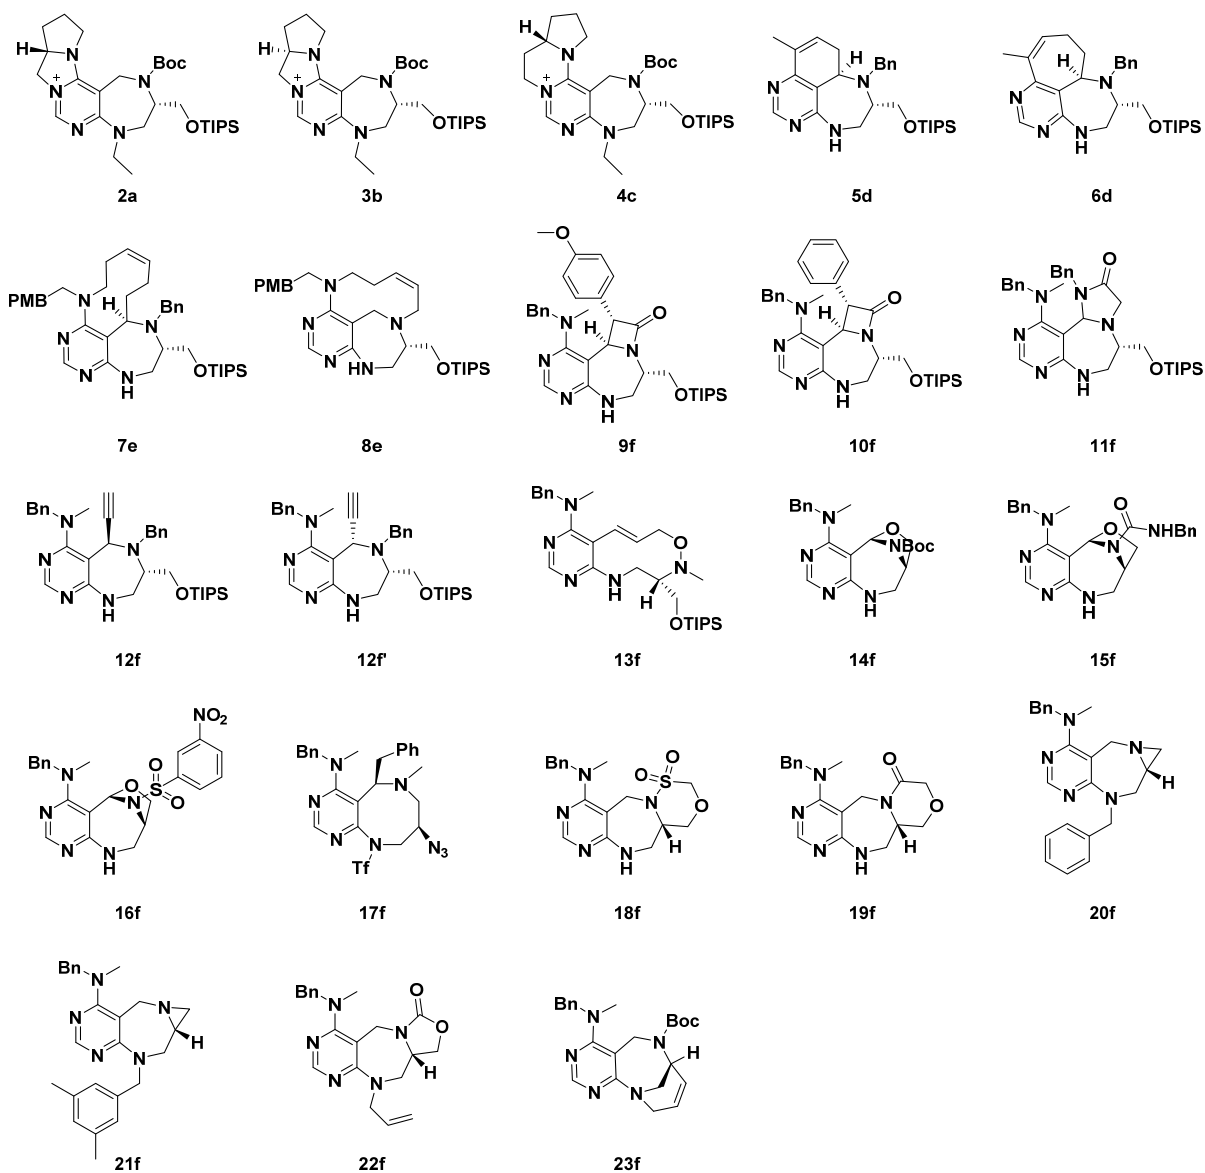

**Supplementary Figure 14. Complete pDOS Library used in PMI analysis**

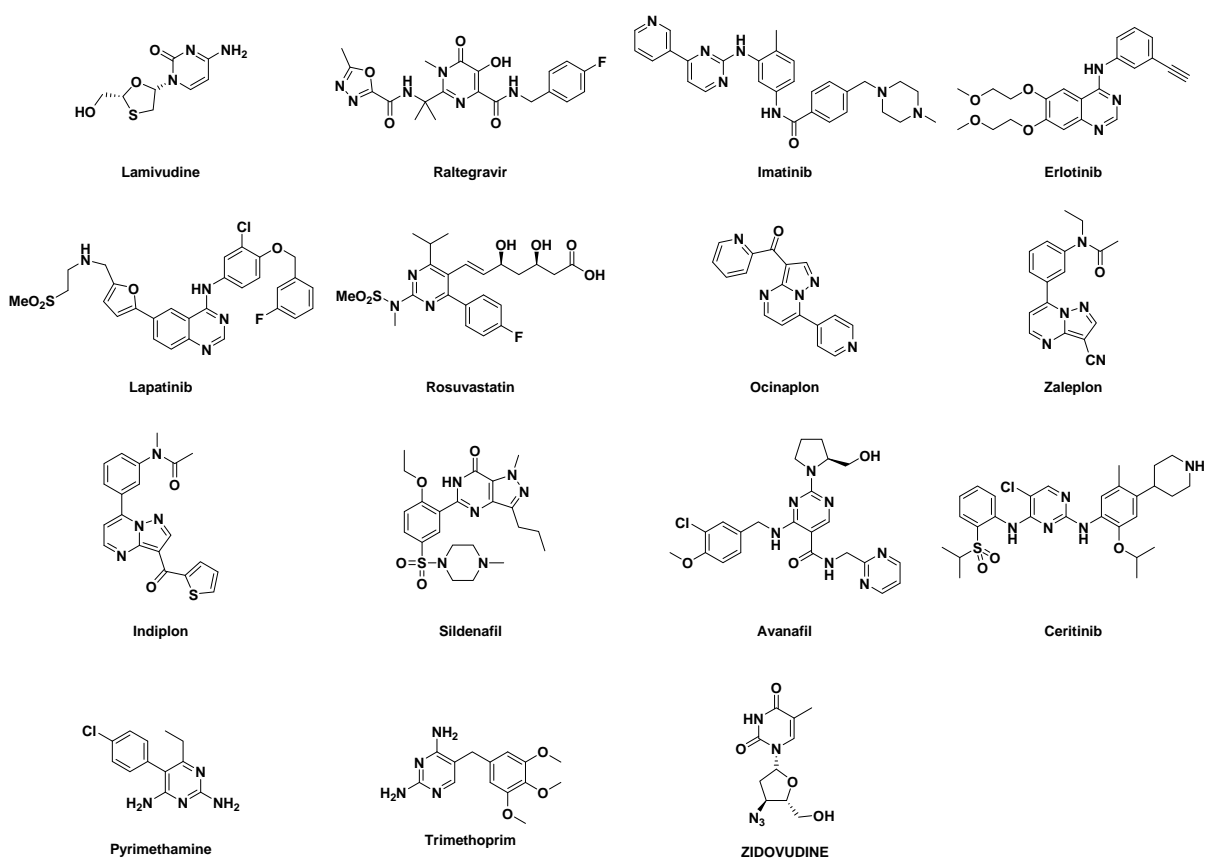

Supplementary Figure 15. FDA-approved drugs embedded with pyrimidine moieties.<sup>1</sup>

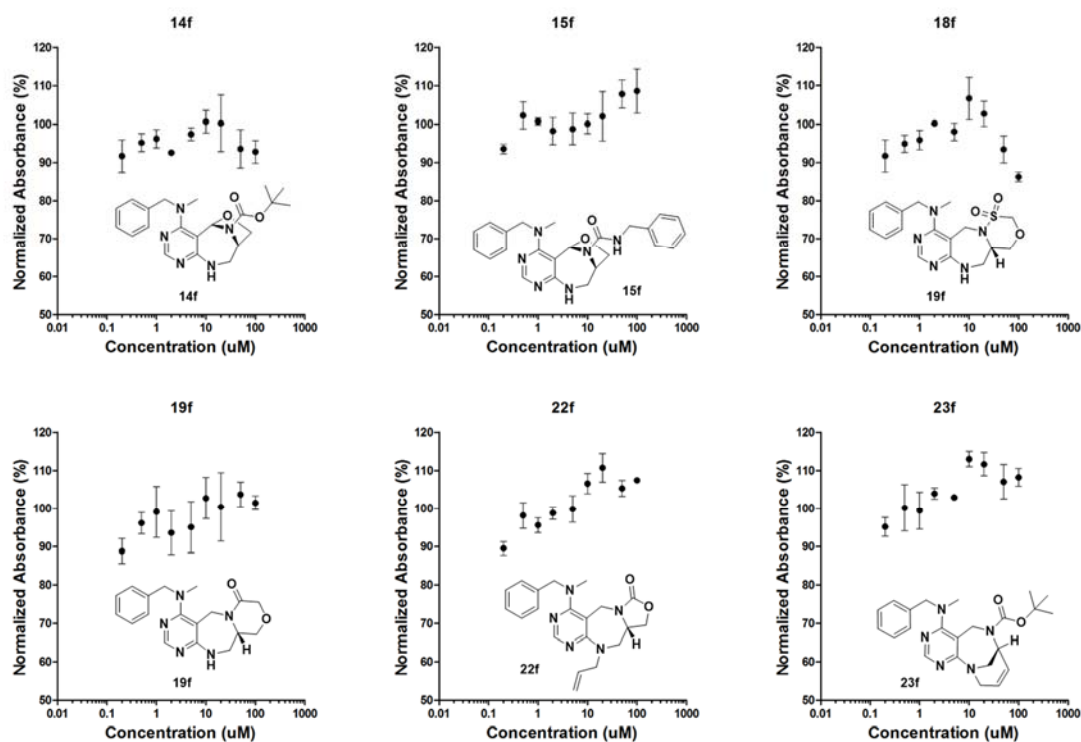

**Supplementary Figure 16.** Dose-response curves in ELISA with **14f**, **15f**, **18f**, **19f**, **22f** and **23f**.



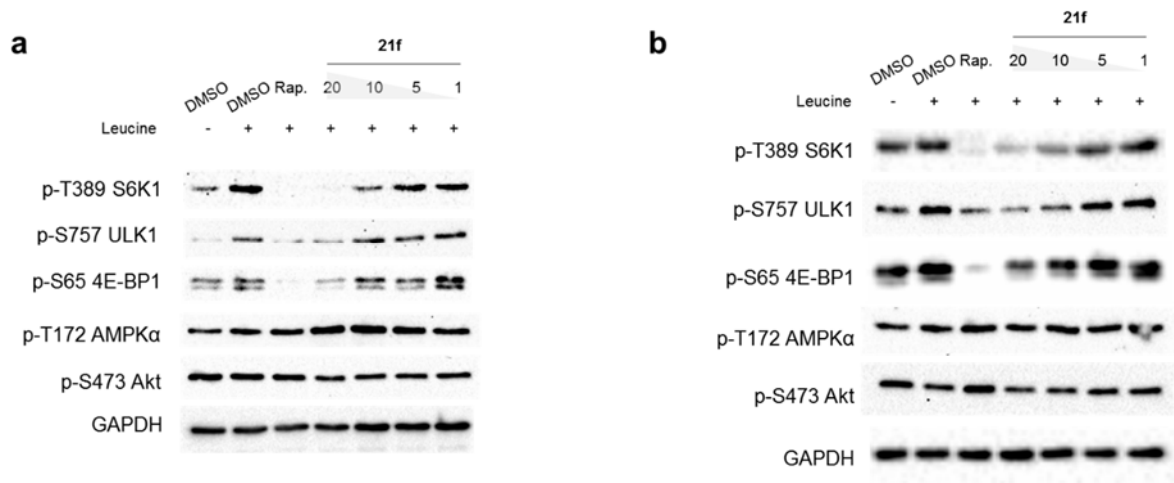

**Supplementary Figure 17.** Effects of **21f** on mTORC1 signaling pathway. a) Ca Ski or b) DU145 Cells were treated with 20, 10, 5, 1 uM of **21f** or 200 nM of Rapamycin for 3 h in complete media condition. For negative control, 293T cells were starved for leucine for 3 h. Phospho-T389 S6K1, phospho-S757 ULK1, phospho-S65 4E-BP1, phospho-T172 AMPK $\alpha$ , phospho-S473 Akt and GAPDH were determined by western blot.

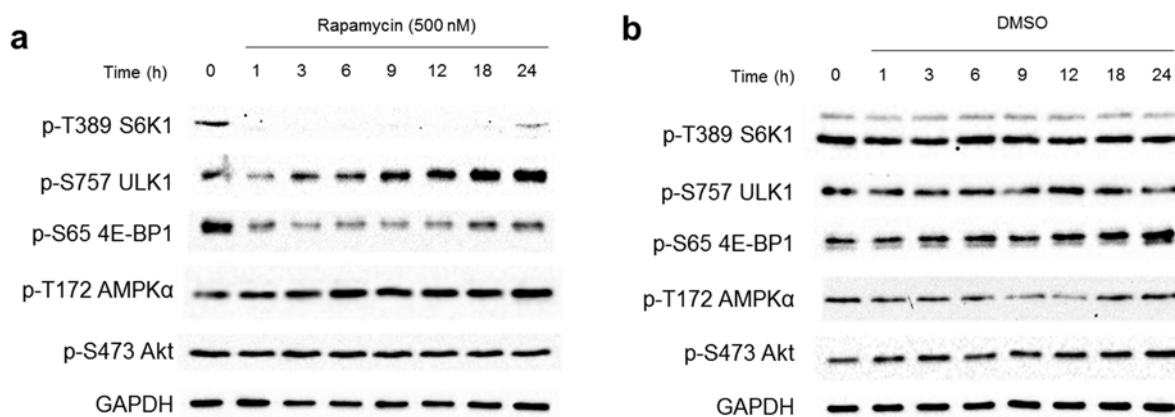

**Supplementary Figure 18.** Effects of **21f** on mTORC1 signaling pathway. HEK293T cells were treated with a) 500 nM Rapamycin or b) DMSO for specified time in complete media. Phospho-T389 S6K1, phospho-S757 ULK1, phospho-S65 4E-BP1, phospho-T172 AMPK $\alpha$ , phospho-S473 Akt and GAPDH were determined by western blot.

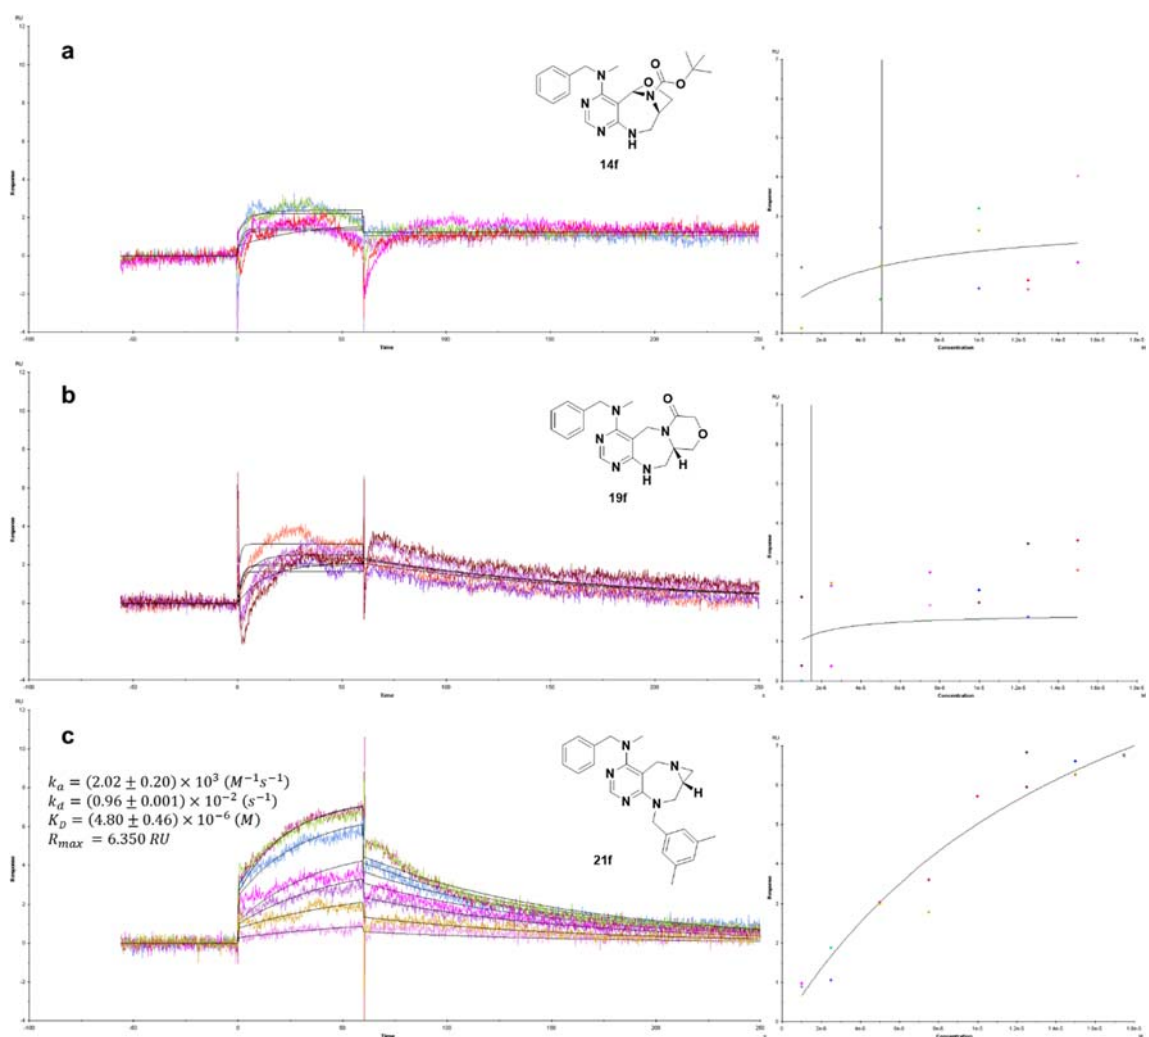

**Supplementary Figure 19.** SPR curves showing concentration-dependent binding to purified LRS. Normalized RUs are plotted over a time course. a) SPR curves with **14f** with 1, 5, 10, 12.5 and 15  $\mu\text{M}$  concentrations. b) SPR curves with **19f** with 1, 2.5, 7.5, 10, 12.5 and 15  $\mu\text{M}$  concentrations. c) SPR curves with **21f** with 1, 2.5, 5, 10, 12.5, 15, 17.5 and 20  $\mu\text{M}$  concentrations.

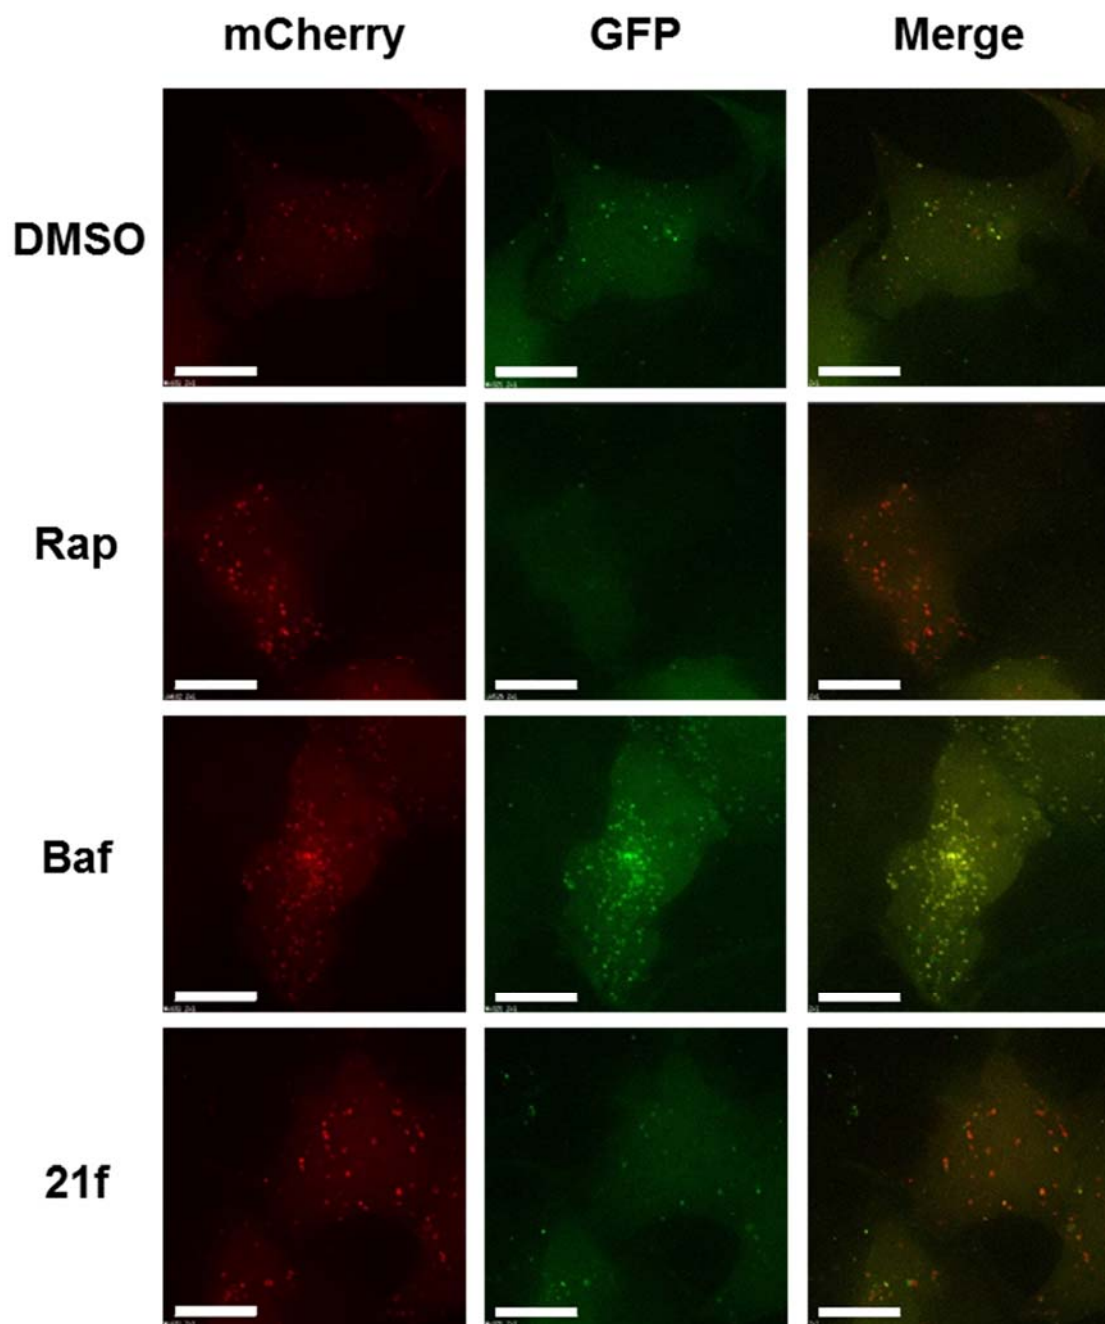

**Supplementary Figure 20.** mCherry and GFP fluorescence images. HeLa cells were transfected with mCherry-GFP-LC3 plasmid and treated with 200 nM of Rap, 10 nM of Baf or 20  $\mu$ M of **21f** for 6 h. Scale bar represents 15  $\mu$ m.

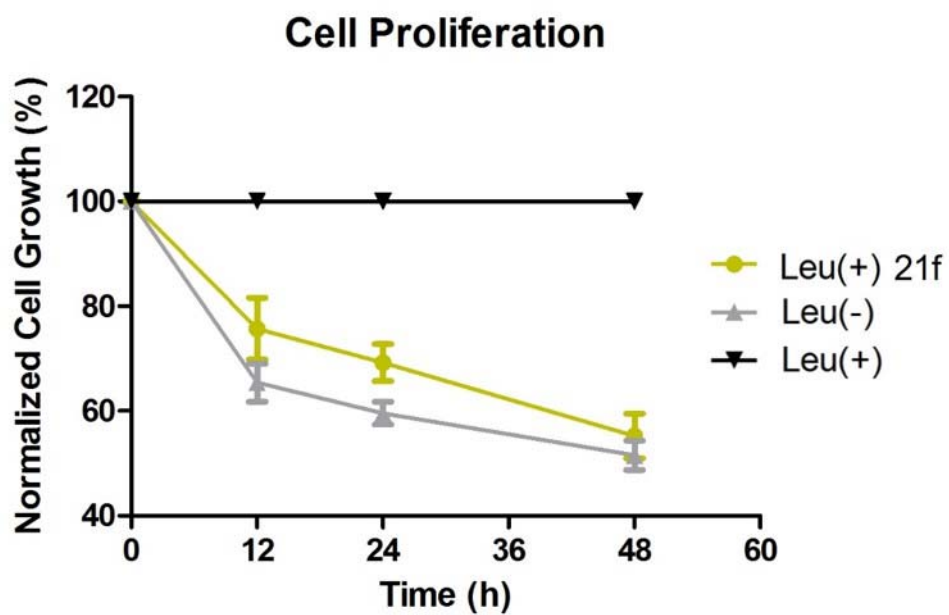

**Supplementary Figure 21.** Cell proliferation assay. Normalized cellular proliferation level in HEK293T cells was measured by WSTs assay under the Leu-deprived media [Leu(-)] or under the normal media in the absence and presence of 20  $\mu$ M of **21f**. Error bars represent the s.e.m.

Fig. 5c

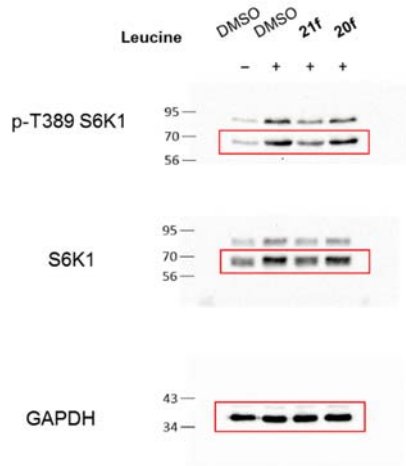

Fig. 5d

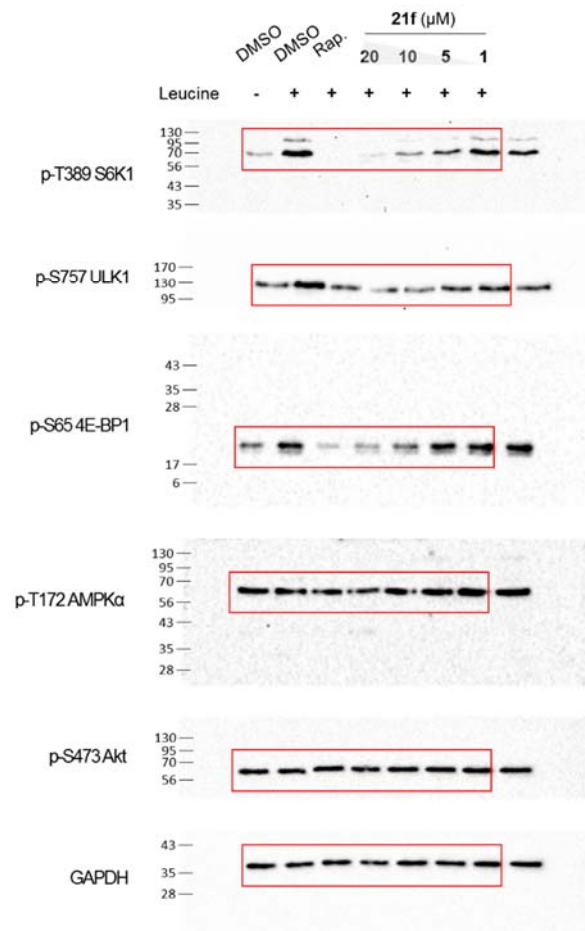

**Fig. 5e**

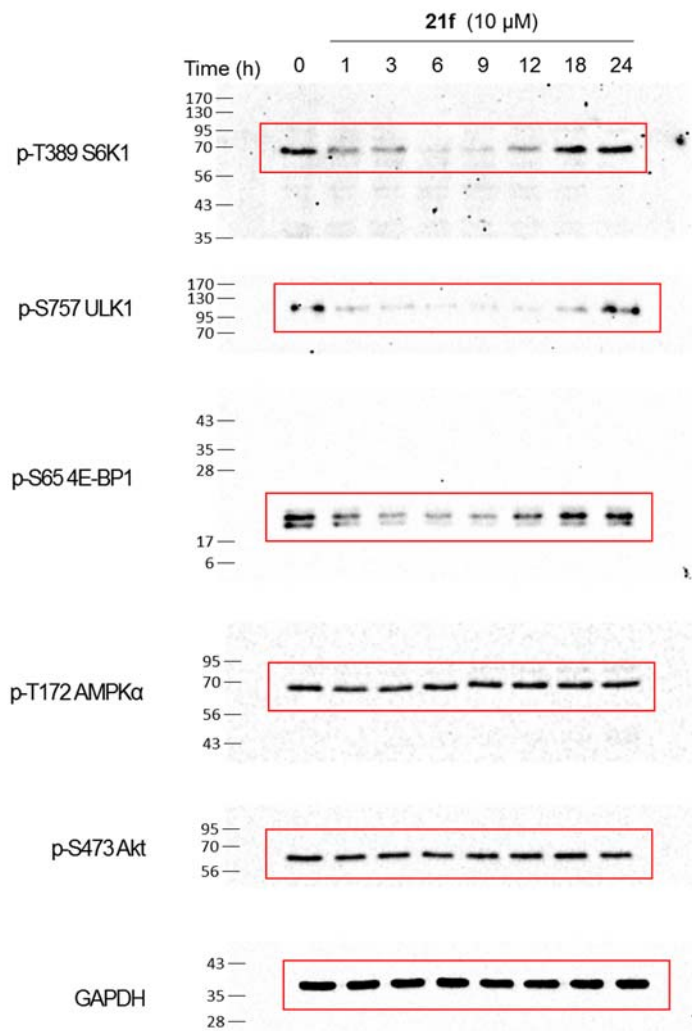

Supplementary fig. 17a

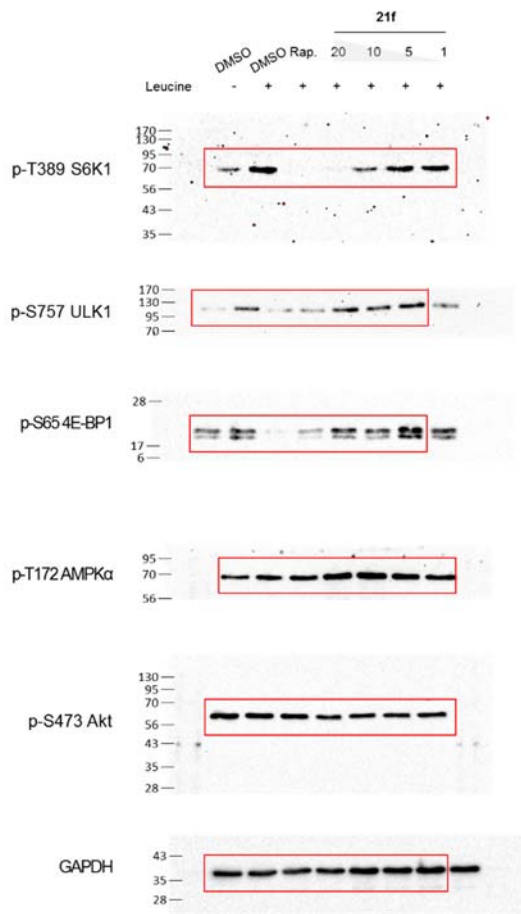

Supplementary fig. 17b

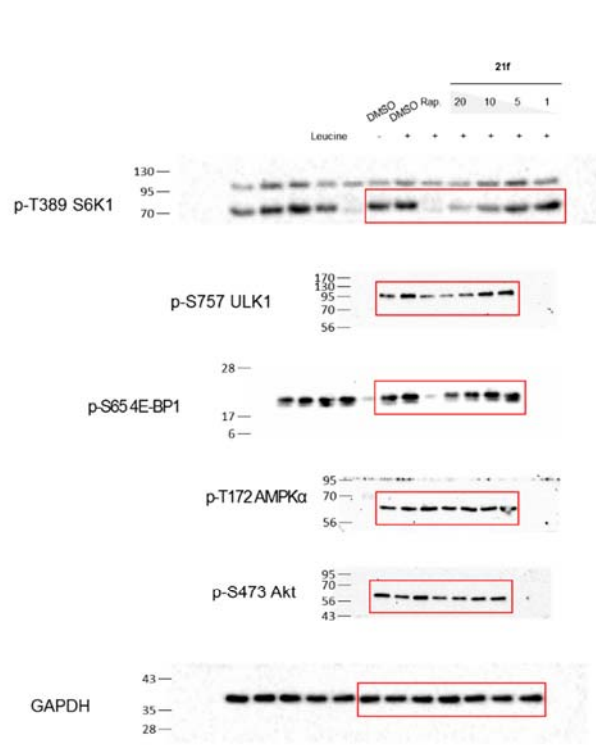



Supplementary fig. 18a

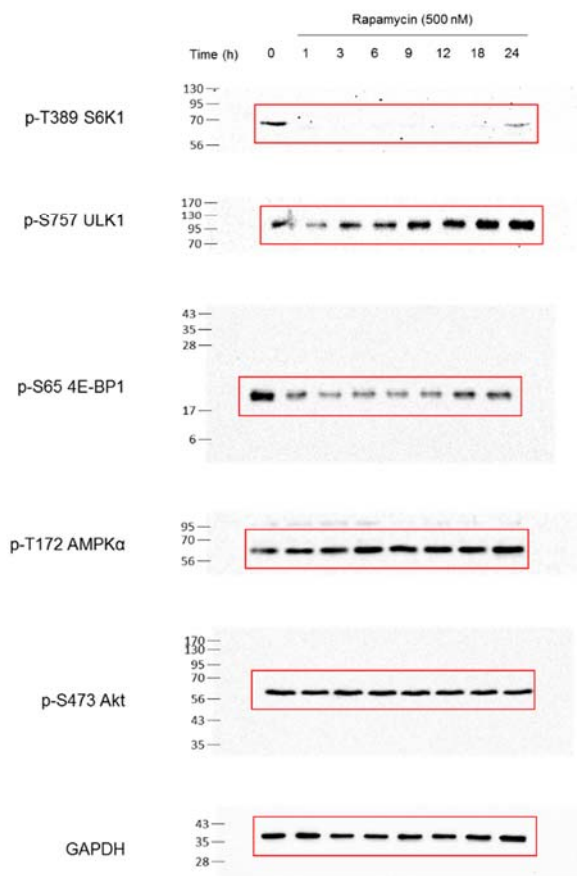

Supplementary fig. 18b

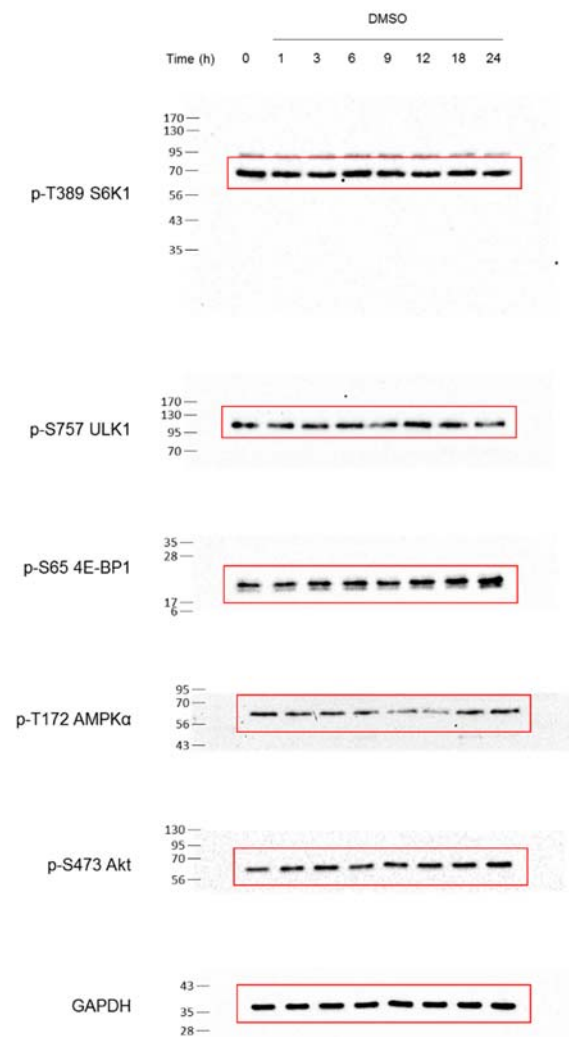

**Supplementary Figure 22.** Full scans of western blots. The protein of interest being detected is labeled on the left side of each blot.

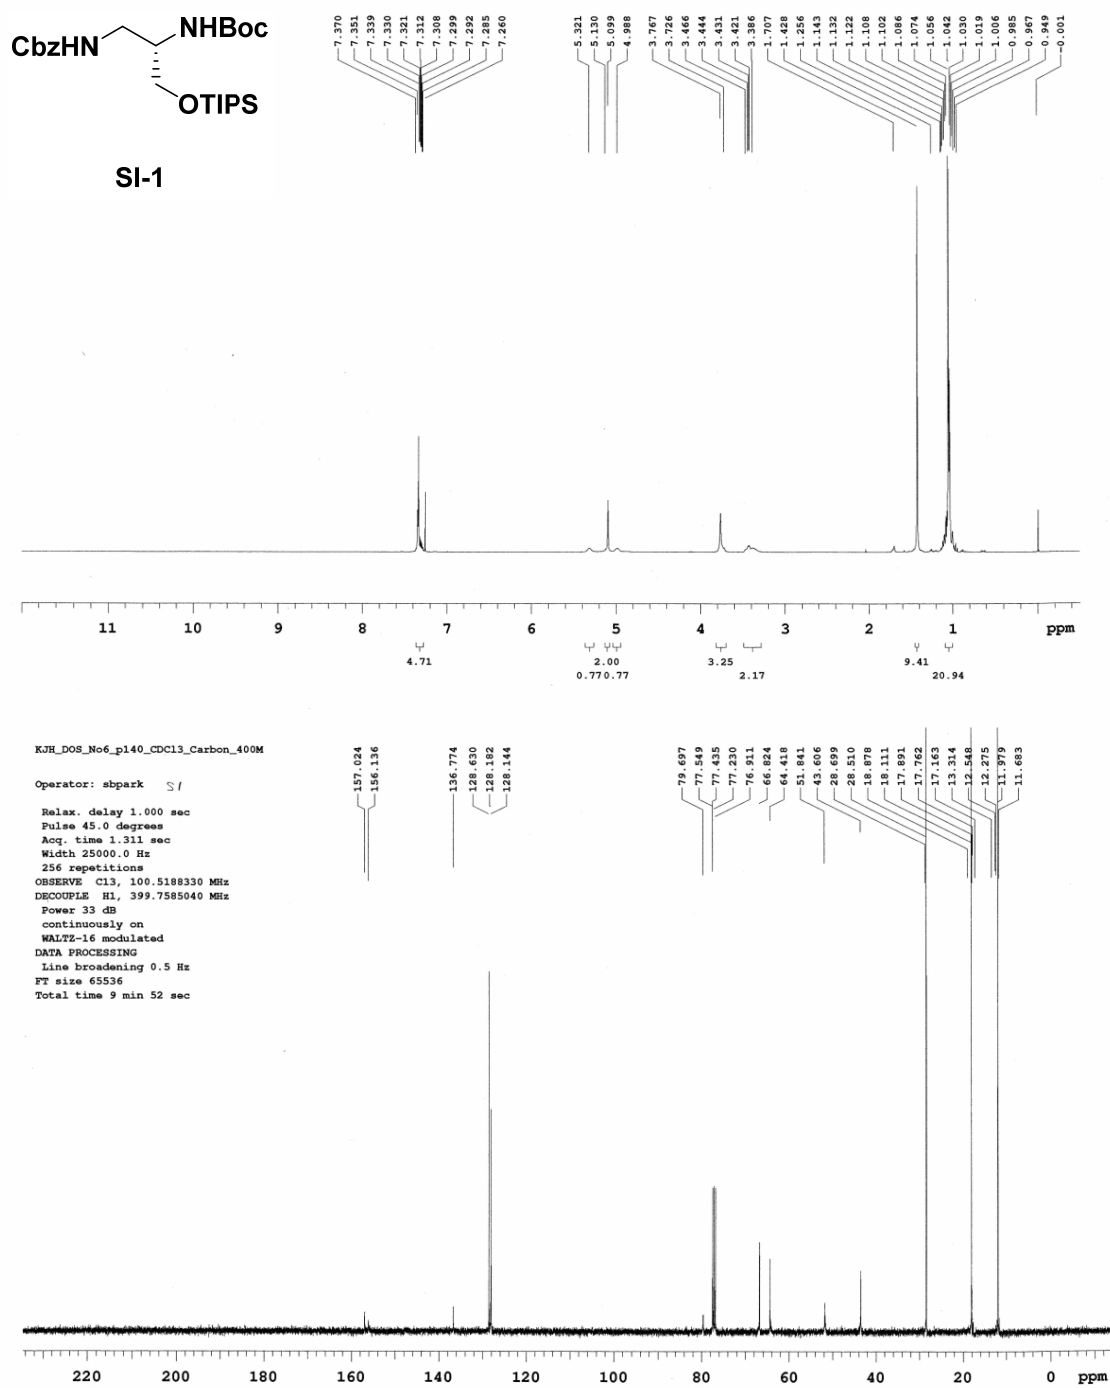

Supplementary Figure 23. <sup>1</sup>H and <sup>13</sup>C NMR spectra for SI-1.

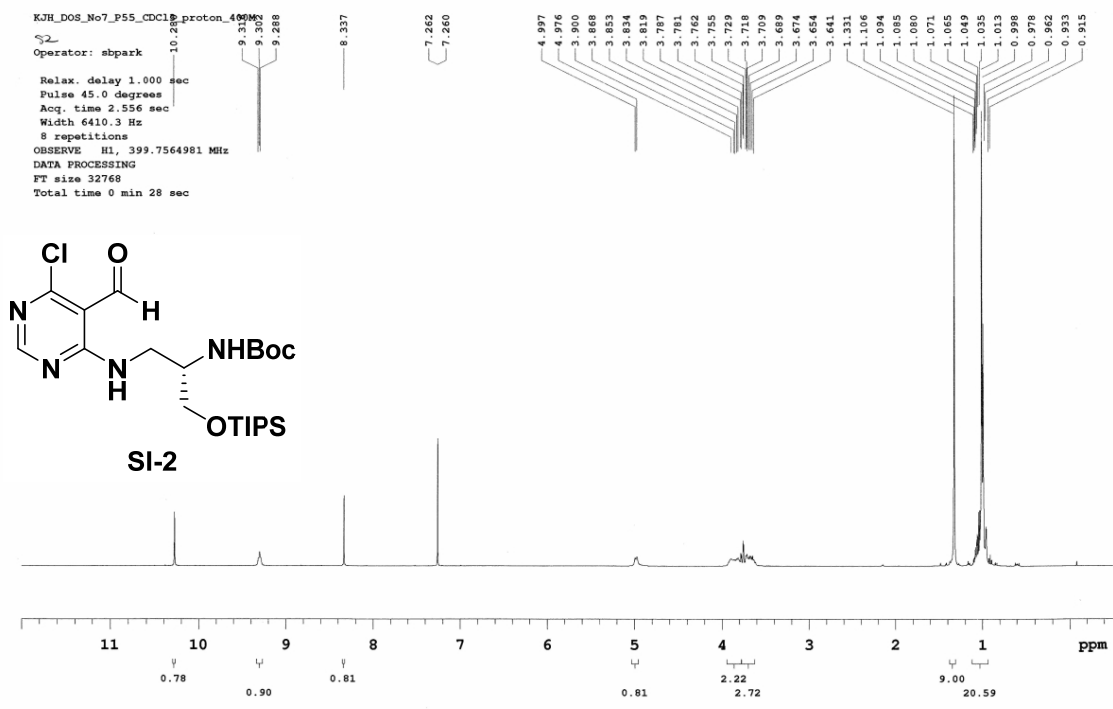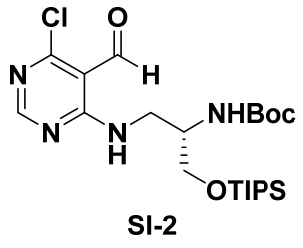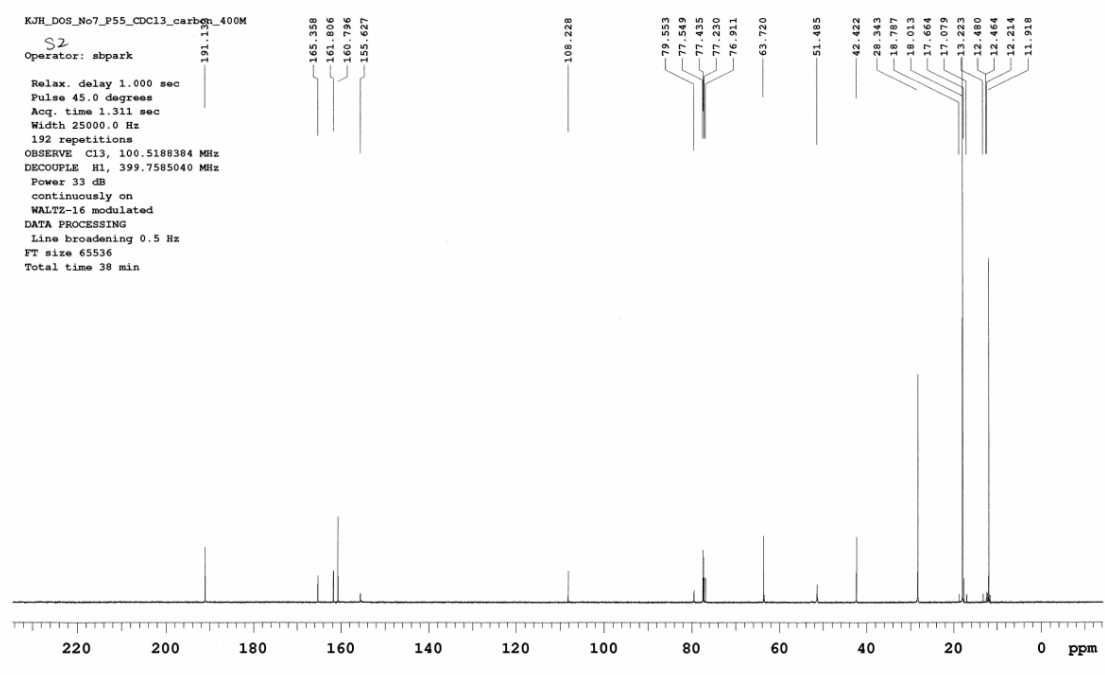

Supplementary Figure 24. <sup>1</sup>H and <sup>13</sup>C NMR spectra for SI-2.

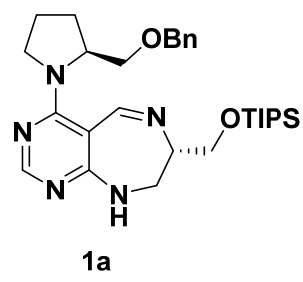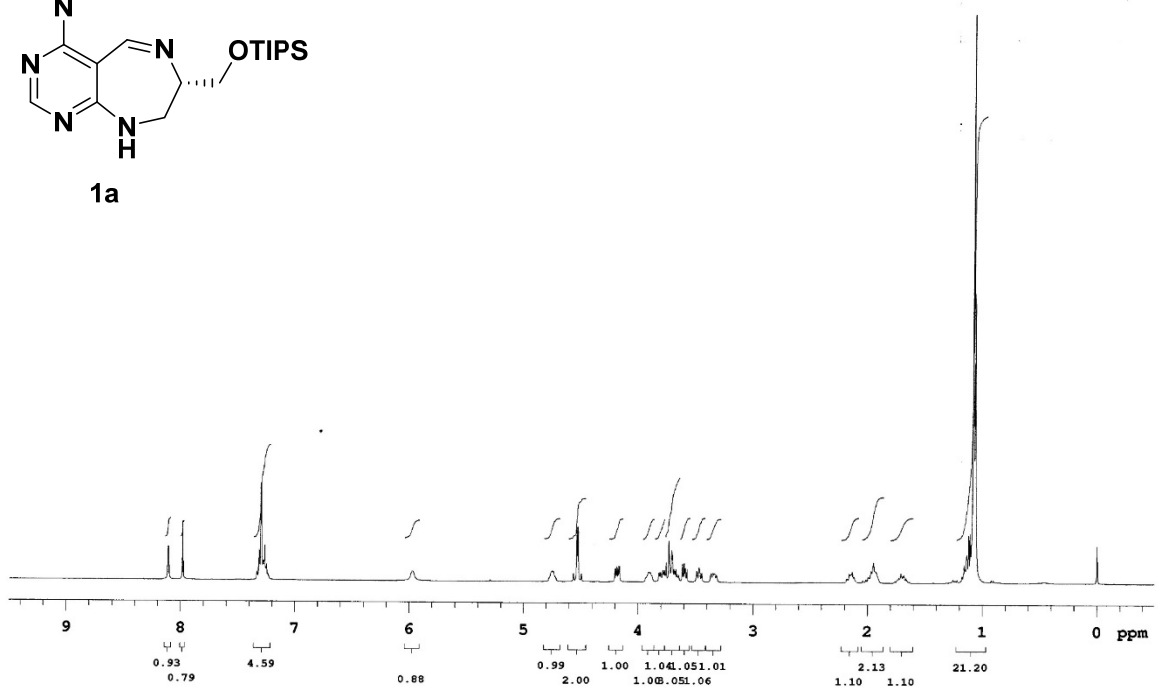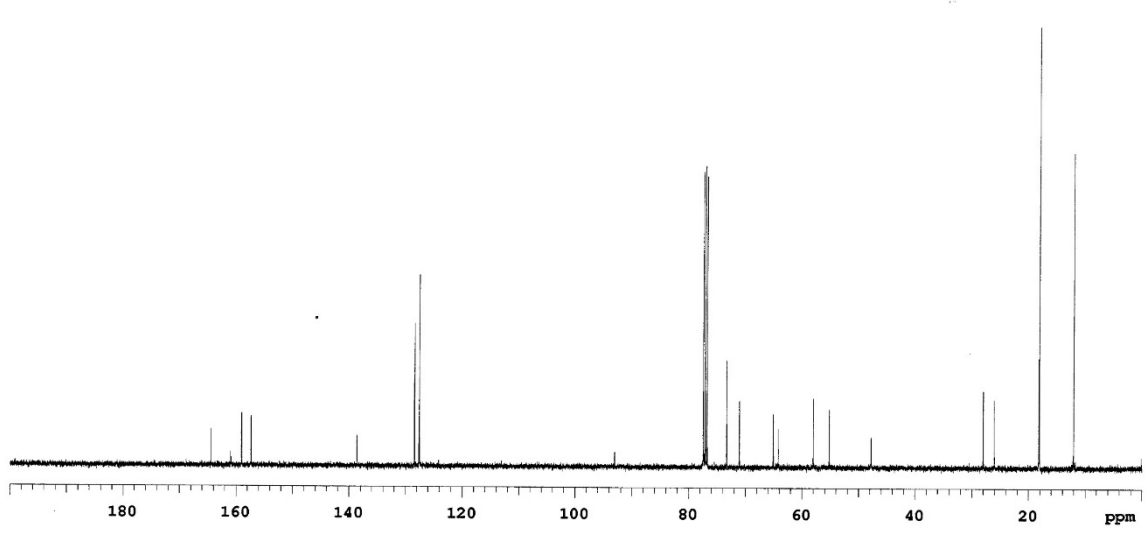

Supplementary Figure 25. <sup>1</sup>H and <sup>13</sup>C NMR spectra for 1a.

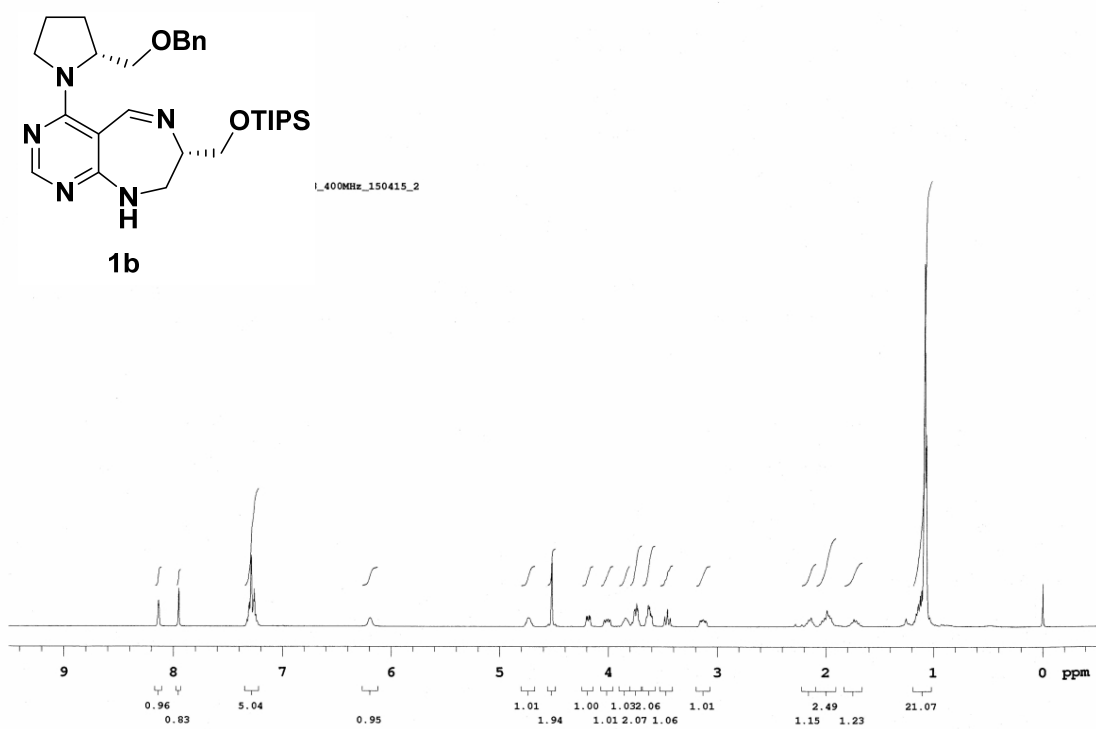

1b\_13C

Sample Name:  
 KC\_03\_067\_imine  
 Data Collected on:  
 Agilent-NMR-vmrs400  
 Archive directory:  
 /home/vmm1/vmrsys/data/sbark  
 Sample directory:  
 KC\_03\_067\_imine\_20150415\_01  
 FidFile: KC\_03\_75A\_cyclization\_imine\_13C\_CDCl3\_400MHz\_150415\_2

Pulse Sequence: CARBON (s2pul)  
 Solvent: cdcl3  
 Data collected on: Apr 15 2015

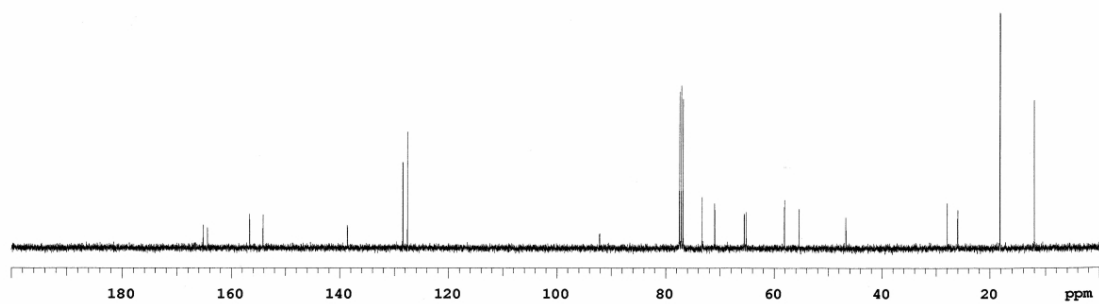

Supplementary Figure 26. <sup>1</sup>H and <sup>13</sup>C NMR spectra for **1b**.

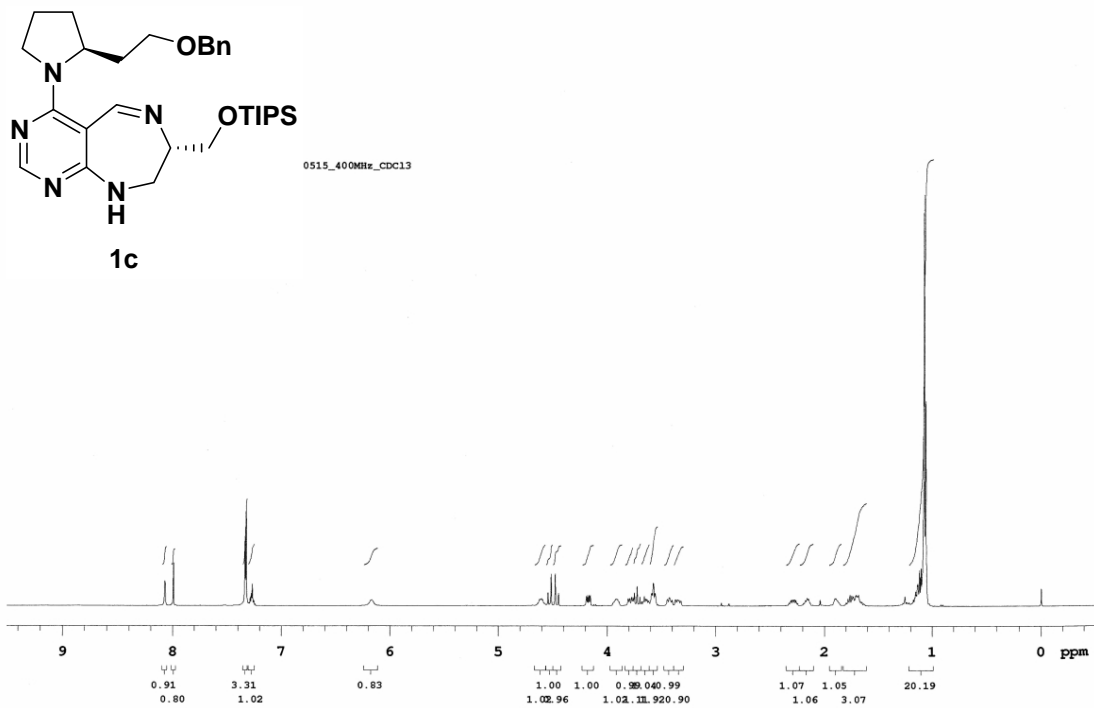

1c\_13C

Sample Name:  
 kc-03-92  
 Data Collected on:  
 Agilent-NMR-vnmrs400  
 Archive directory:  
 /home/vmm1/vmmrsvs/data/sbark  
 Sample directory:  
 kc-03-92\_20150515\_01  
 FidFile: KC\_03\_92A\_13C\_imine\_homoprolinol\_150515\_400MHz\_CDCl3\_2222

Pulse Sequence: CARBON (s2pul)  
 Solvent: cdcl3  
 Data collected on: May 15 2015

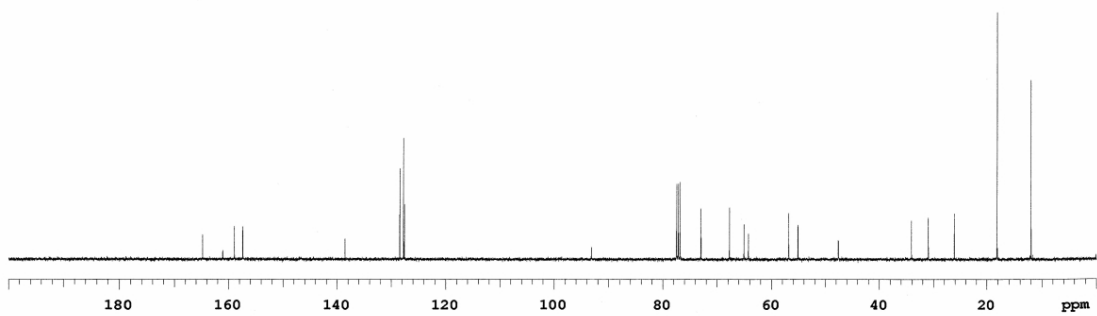

Supplementary Figure 27.  $^1\text{H}$  and  $^{13}\text{C}$  NMR spectra for **1c**.

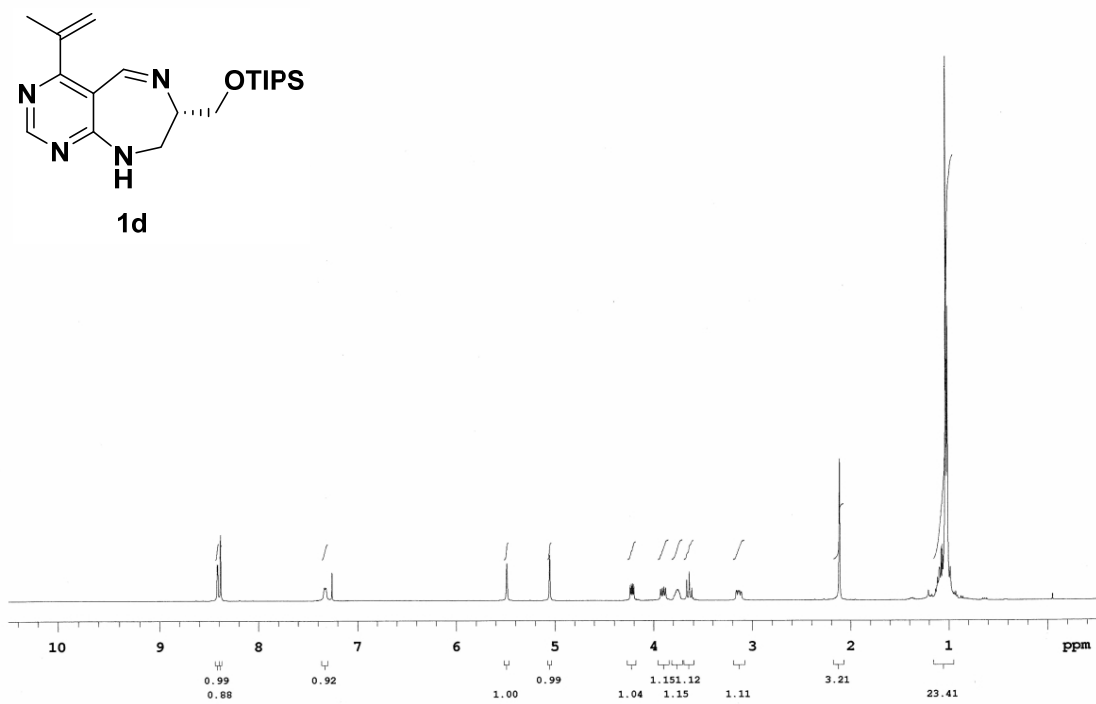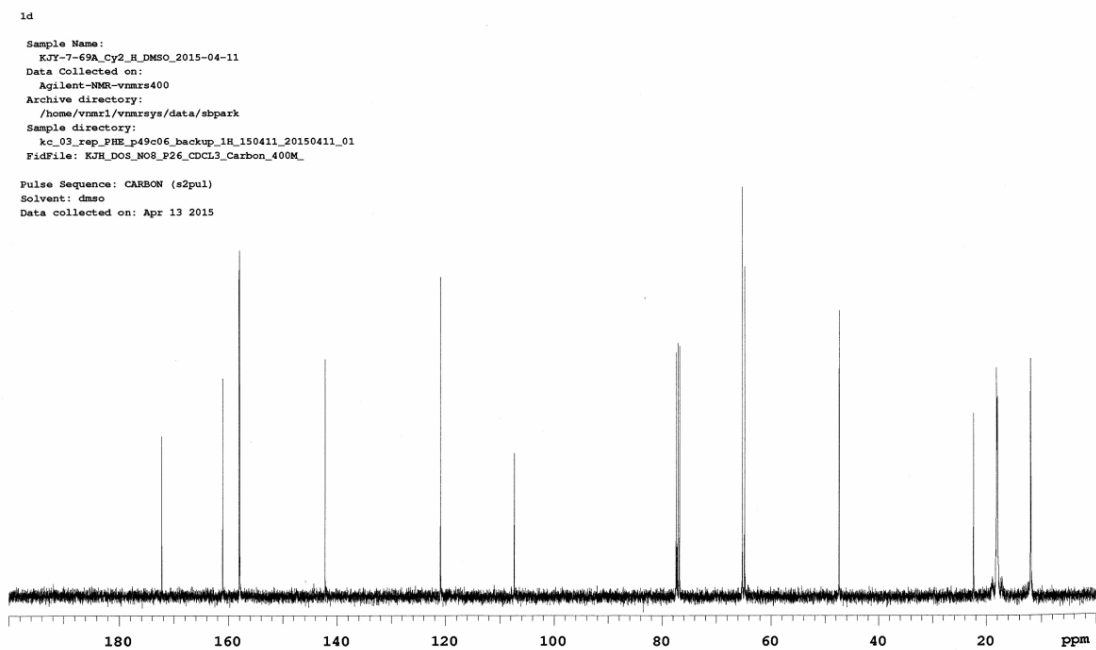

**Supplementary Figure 28.**  $^1\text{H}$  and  $^{13}\text{C}$  NMR spectra for **1d**.

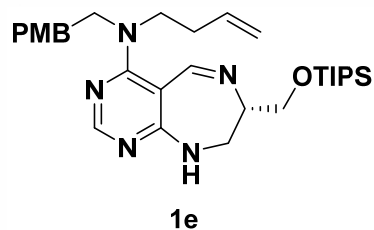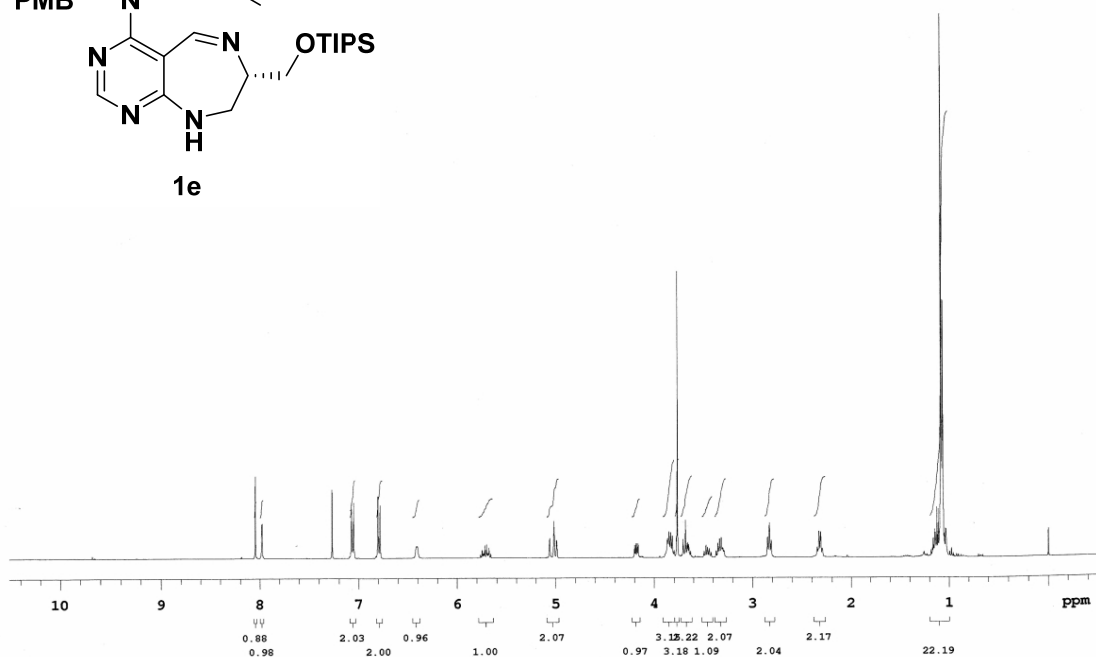

**1e**  
 Sample Name: KJH\_DOS\_NO7\_F51\_Carbon\_CDCl3\_400M  
 Data Collected on: Agilent-NMR-vnmrs400  
 Archive directory: /home/vnmr1/vnmrsys/data/chulbon  
 Sample directory: KTH\_V\_85\_pr\_20140922\_01  
 FidFile: KJH\_DOS\_NO7\_F51\_CDCl3\_Carbon\_400M  
 Pulse Sequence: CARBON (s2pul)  
 Solvent: cdcl3  
 Data collected on: Oct 6 2014

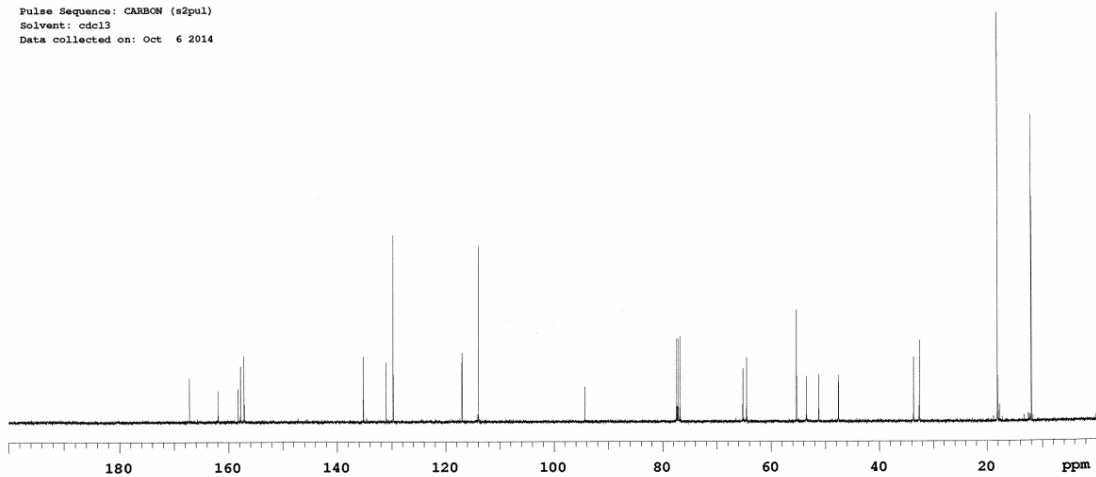

Supplementary Figure 29. <sup>1</sup>H and <sup>13</sup>C NMR spectra for **1e**.



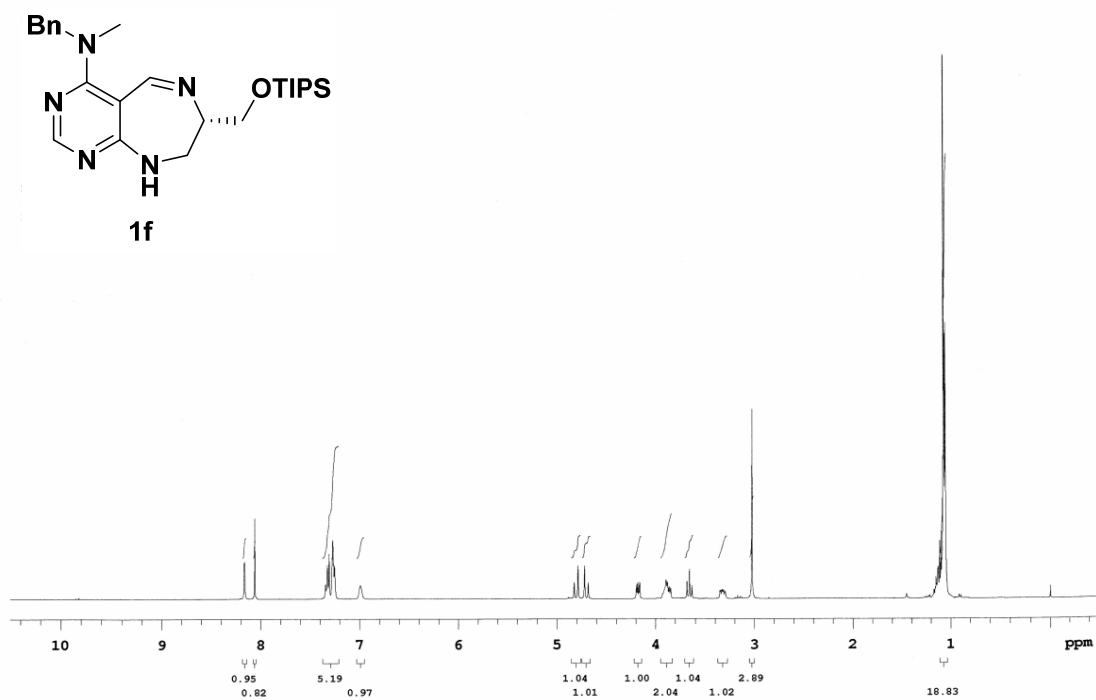

1f

Sample Name:  
JAE-V-41\_imine\_clean\_13C  
Data Collected on:  
Agilent-NMR-vmrs400  
Archive directory:  
/home/vmrml/vmrsys/data/shhong  
Sample directory:  
MH\_Ru\_lactam7\_RT\_20150405\_01  
FidFile: JAE-V-41\_imine\_clean\_13C

Pulse Sequence: CARBON (s2pul)  
Solvent: cdcl3  
Data collected on: Apr 9 2015

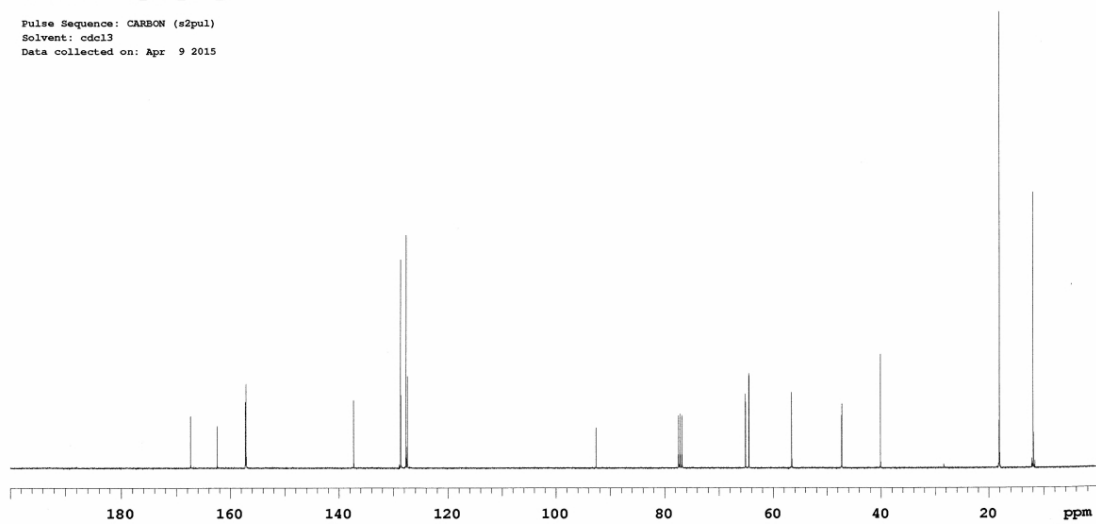

Supplementary Figure 30.  $^1\text{H}$  and  $^{13}\text{C}$  NMR spectra for **1f**.

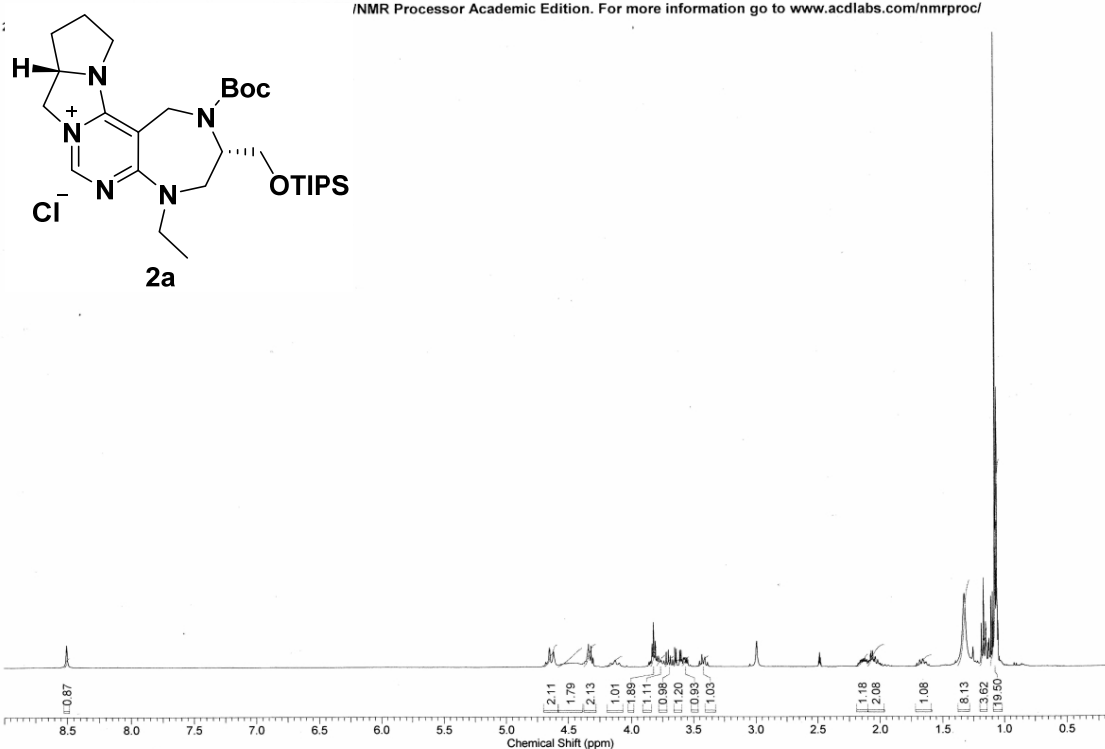

This report was created by ACD/NMR Processor Academic Edition. For more information go to [www.acdlabs.com/nmrproc/](http://www.acdlabs.com/nmrproc/)

2A\_CARBON-1.esp

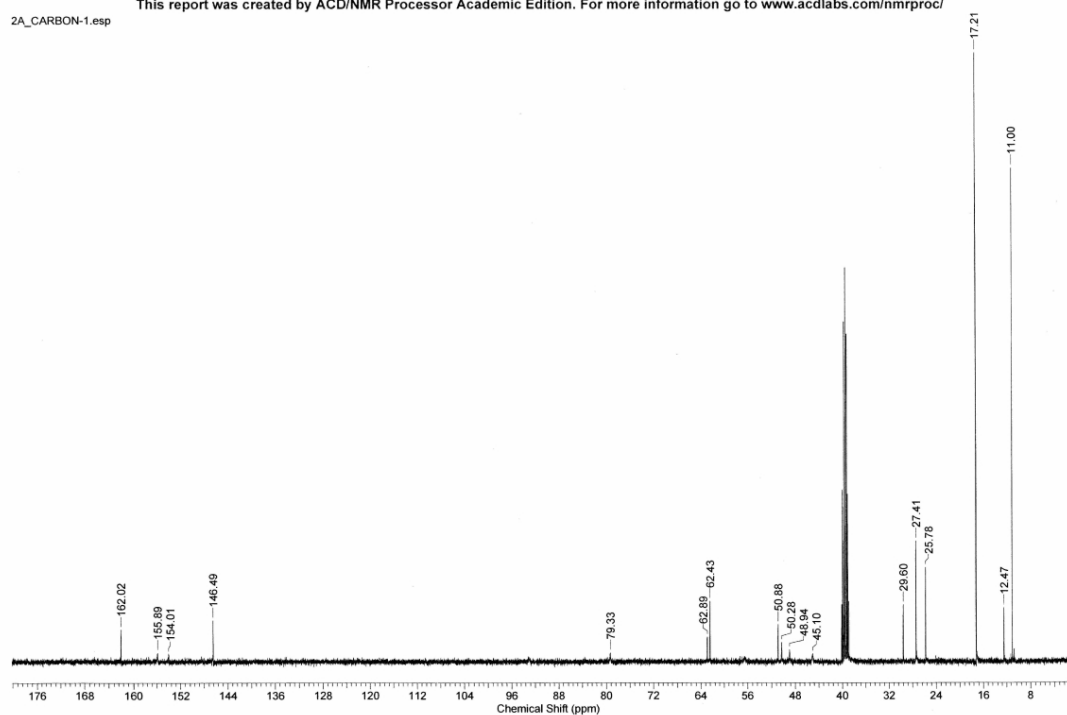

Supplementary Figure 31.  $^1\text{H}$  and  $^{13}\text{C}$  NMR spectra for **2a**.

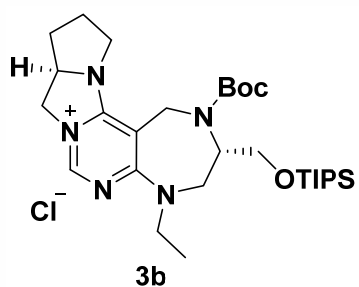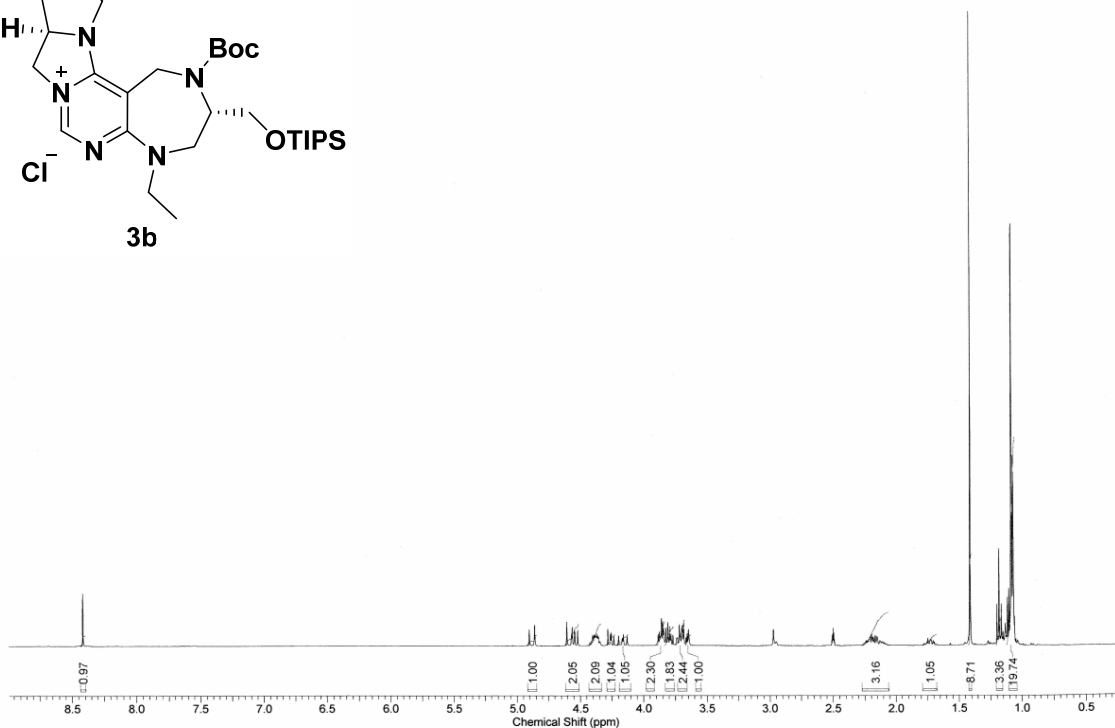

This report was created by ACD/NMR Processor Academic Edition. For more information go to [www.acdlabs.com/nmrproc/](http://www.acdlabs.com/nmrproc/)

3B\_CARBON-1.JDF

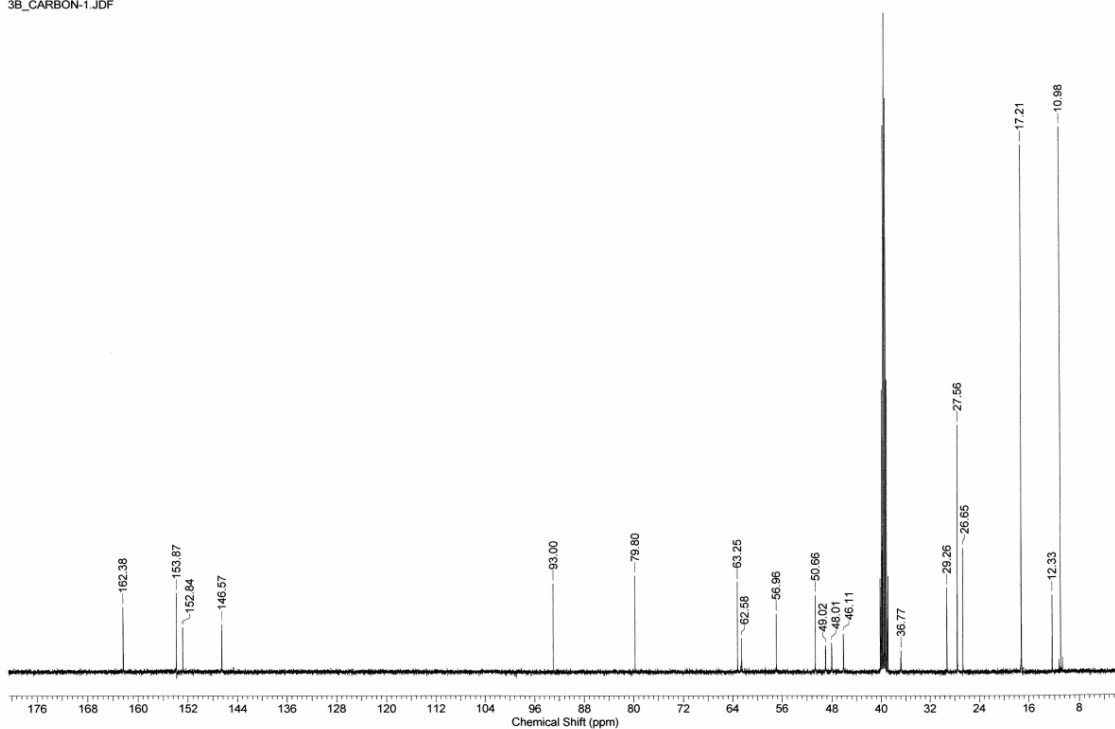

Supplementary Figure 32.  $^1\text{H}$  and  $^{13}\text{C}$  NMR spectra for **3b**.

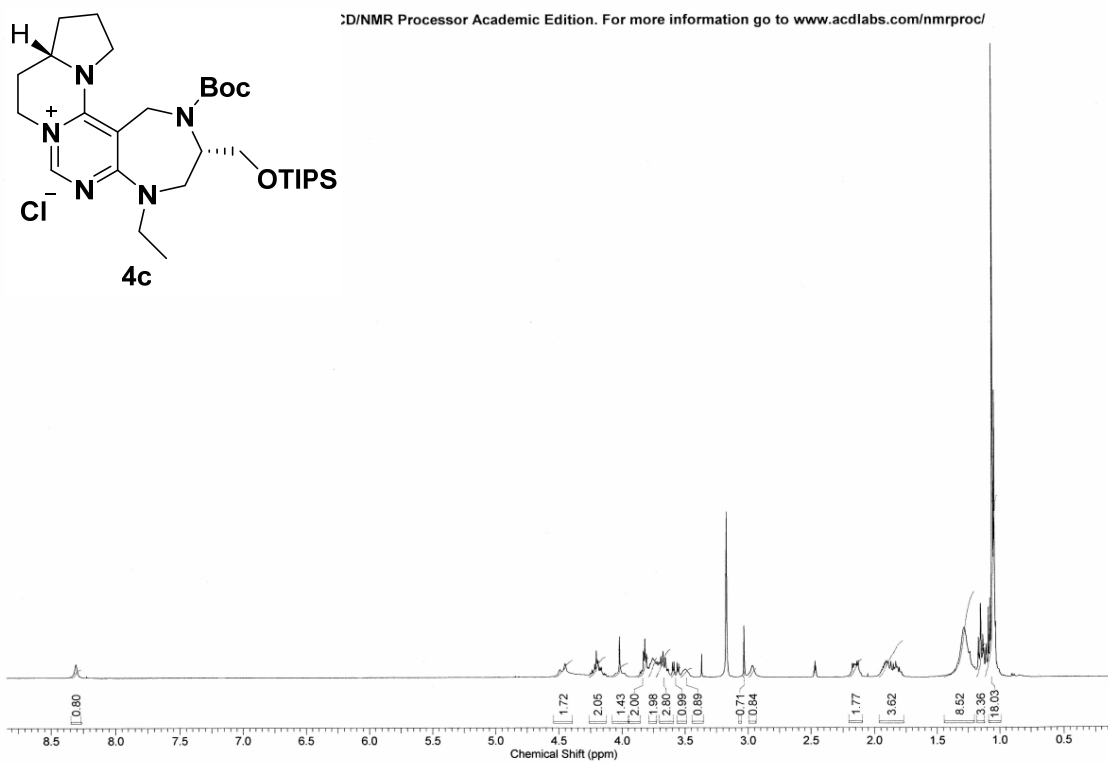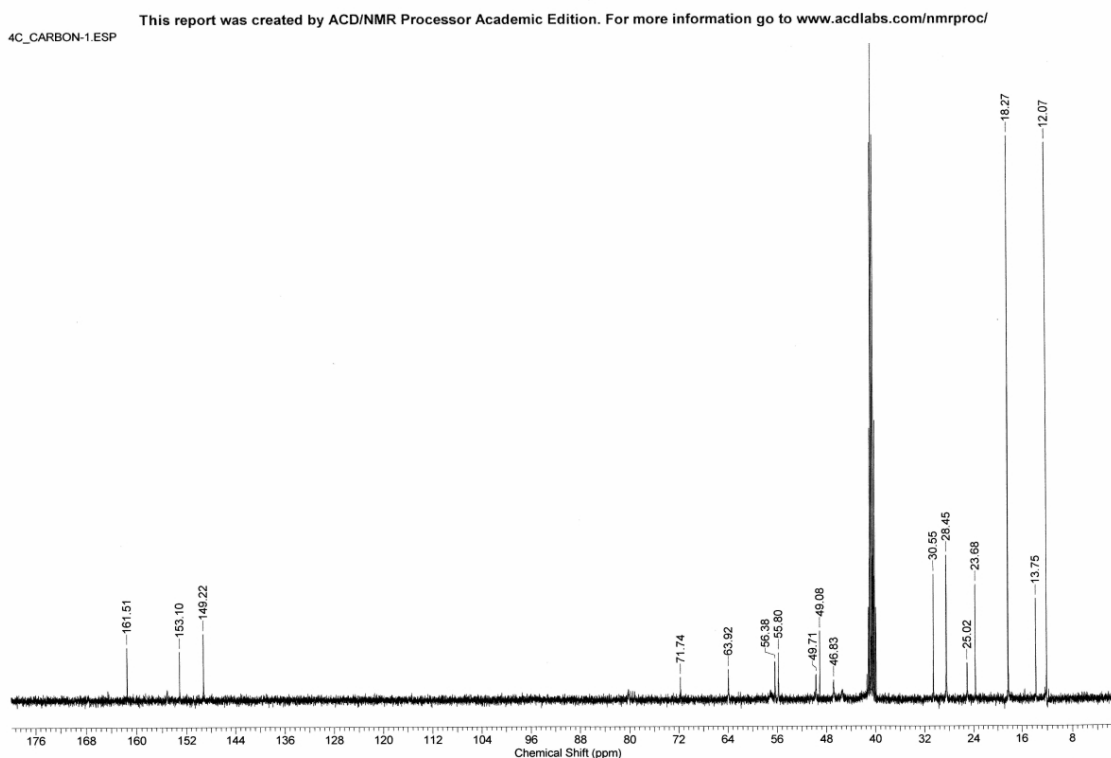

**Supplementary Figure 33.**  $^1\text{H}$  and  $^{13}\text{C}$  NMR spectra for **4c**.

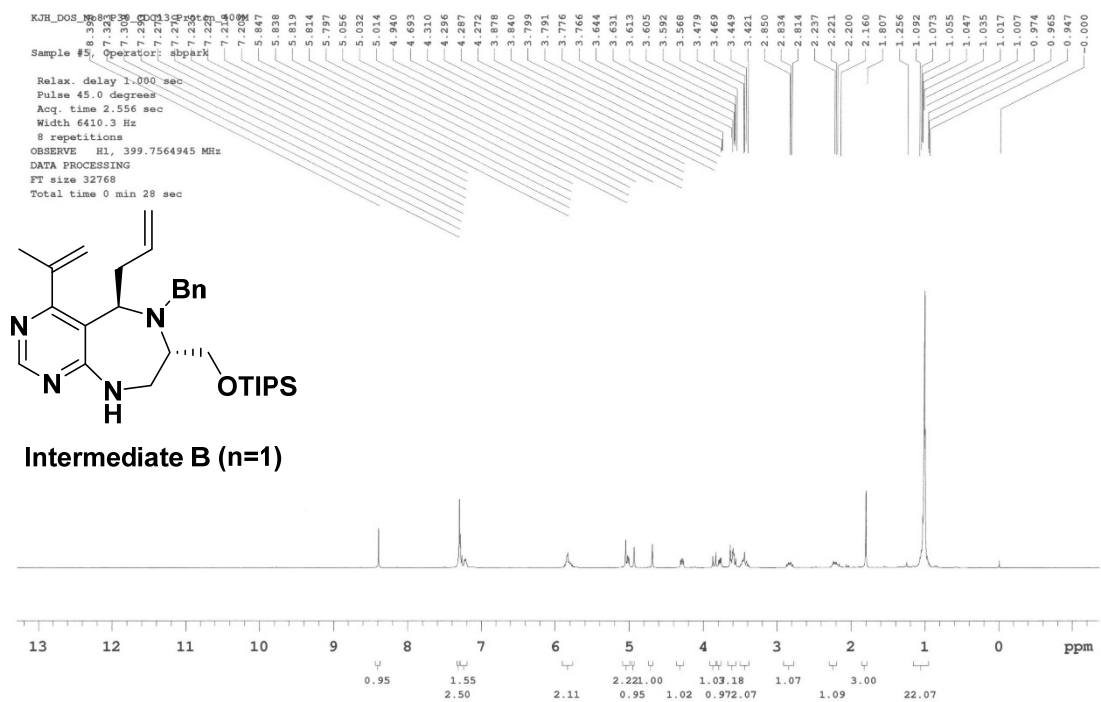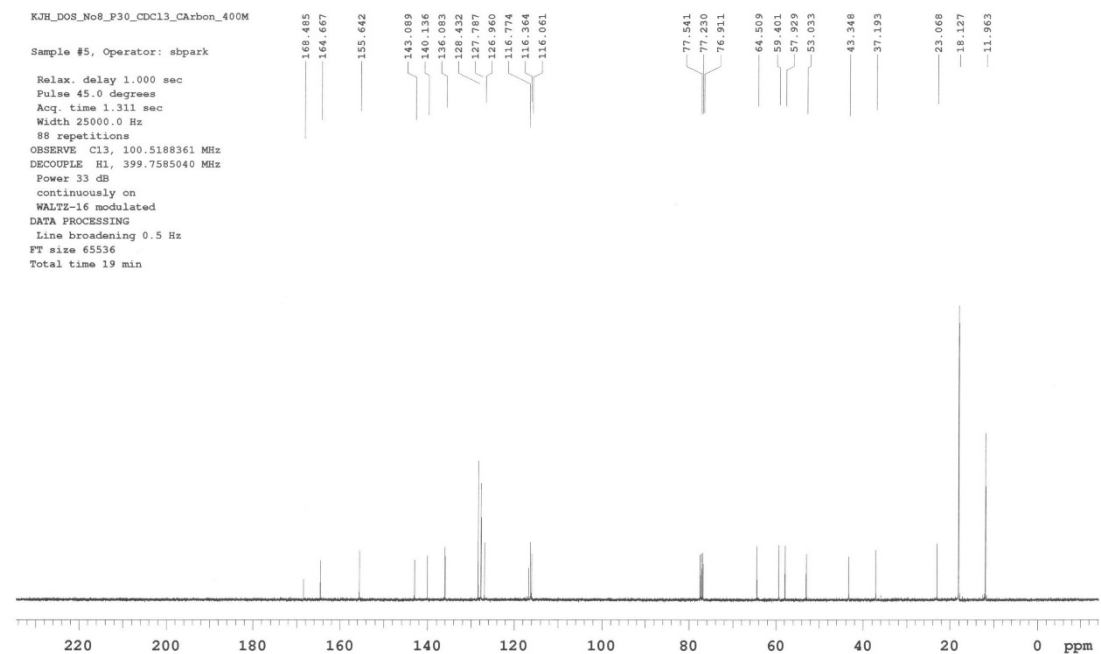

Supplementary Figure 34.  $^1\text{H}$  and  $^{13}\text{C}$  NMR spectra for Intermediate B (n=1).

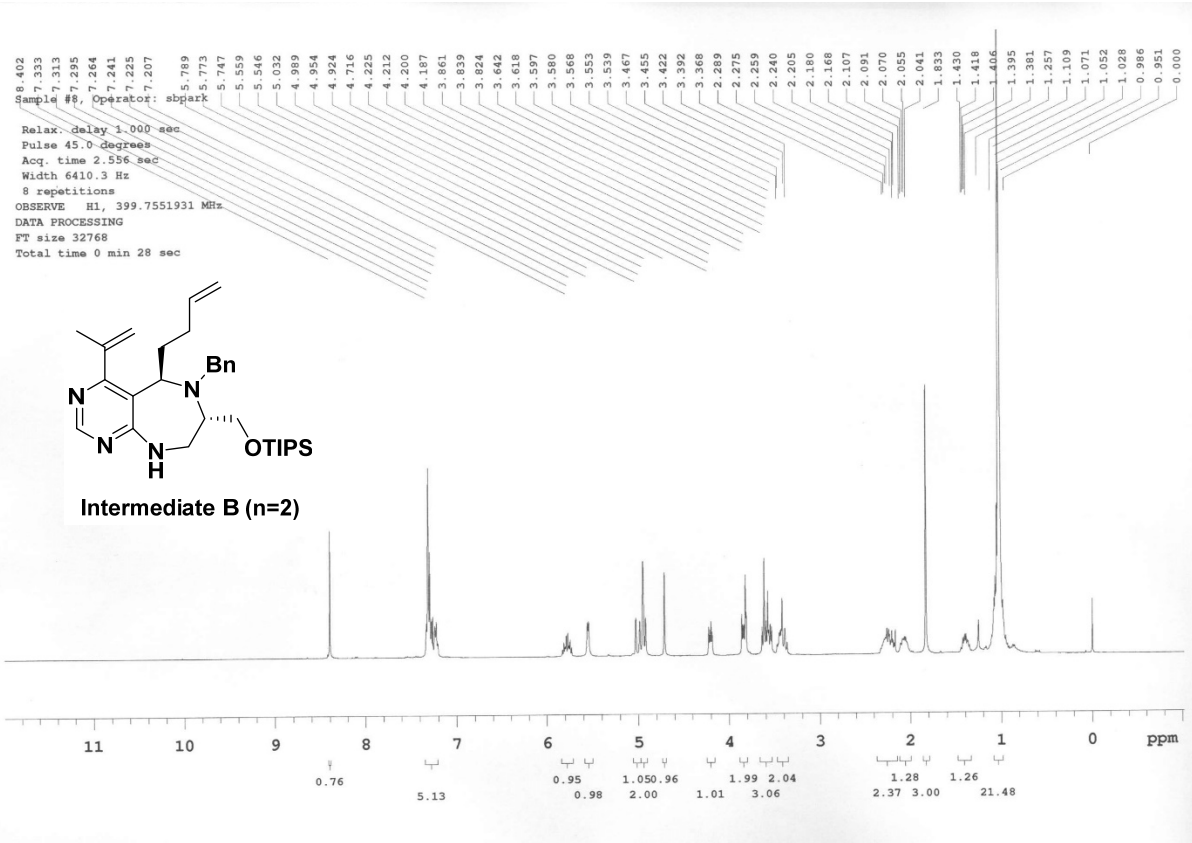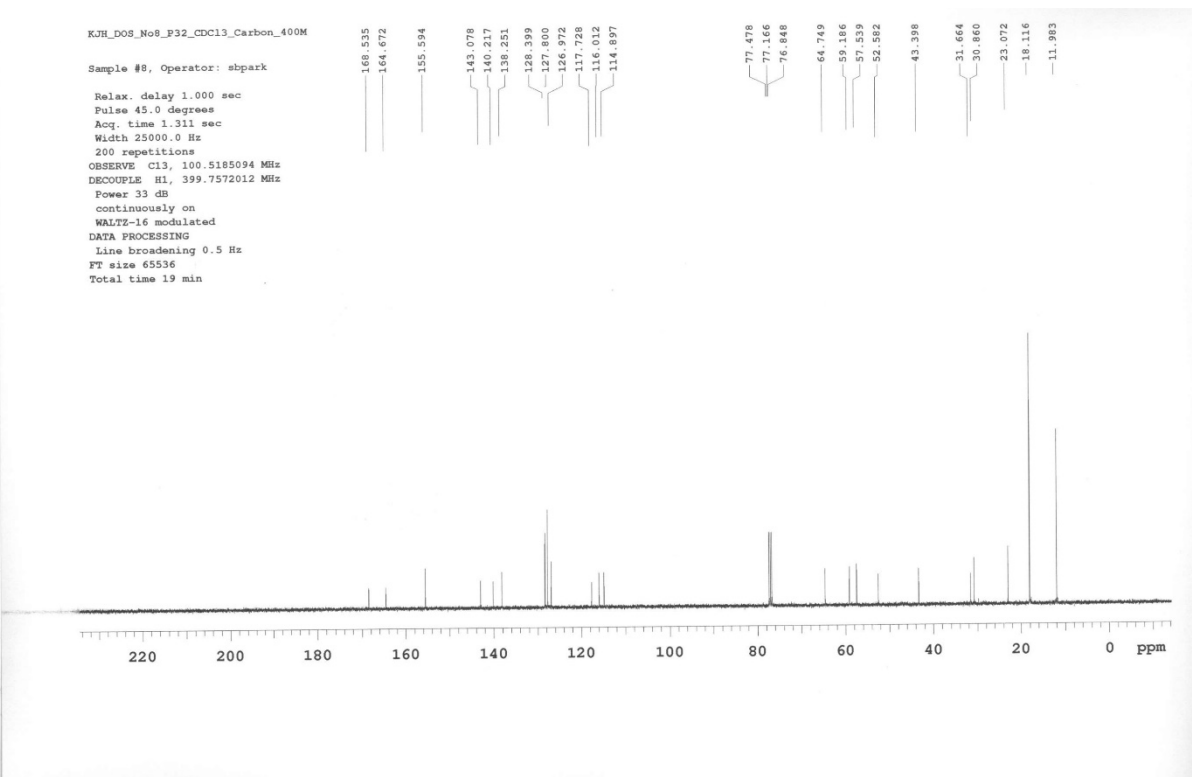

Supplementary Figure 35. <sup>1</sup>H and <sup>13</sup>C NMR spectra for **Intermediate B (n=2)**.

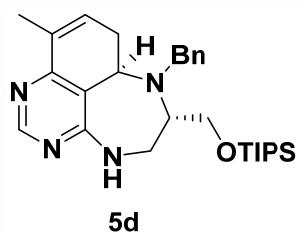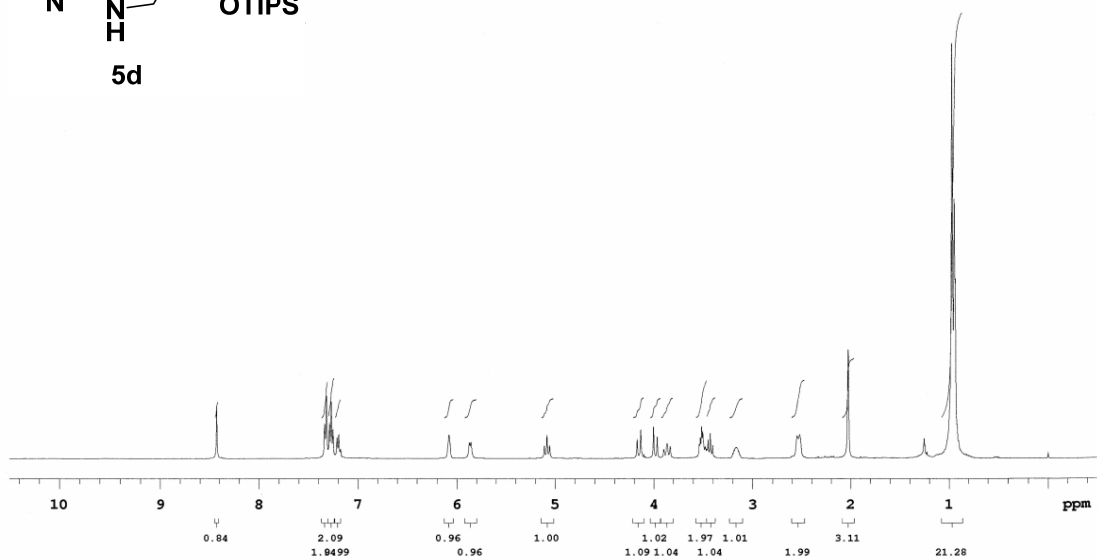

5d

Sample Name:  
KJH\_DOS\_No8\_F31\_CDCl3\_400M\_Carbon  
Data Collected on:  
Agilent-VNMR-vnmrs400  
Archive directory:  
/home/vnmr1/vnmrsys/data/sbspark  
Sample directory:  
CYN\_20150414\_03006\_20150414\_01  
FidFile: KJH\_DOS\_No8\_F31\_CDCl3\_Carbon\_400M\_

Pulse Sequence: CARBON (s2pul)  
Solvent: dms  
Data collected on: Apr 14 2015

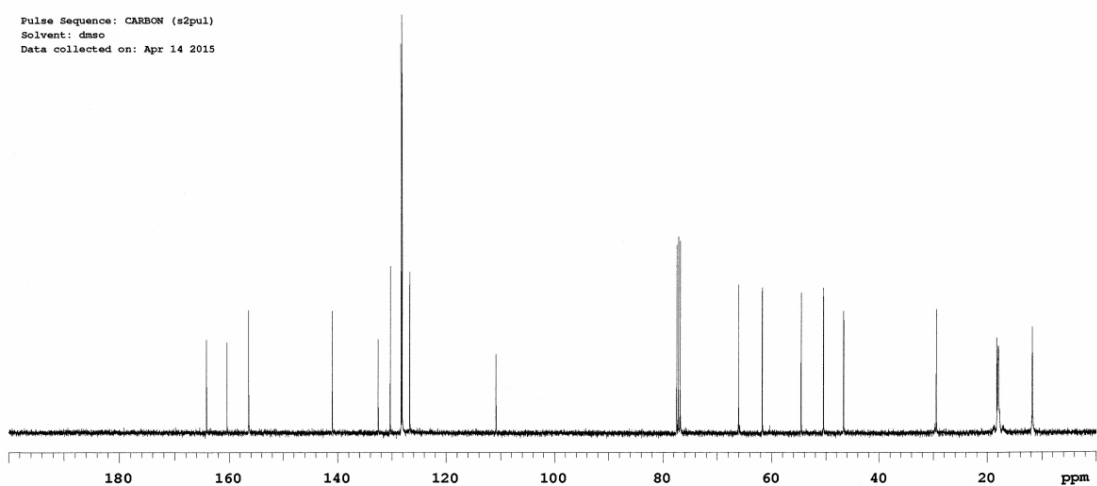

Supplementary Figure 36.  $^1\text{H}$  and  $^{13}\text{C}$  NMR spectra for **5d**.

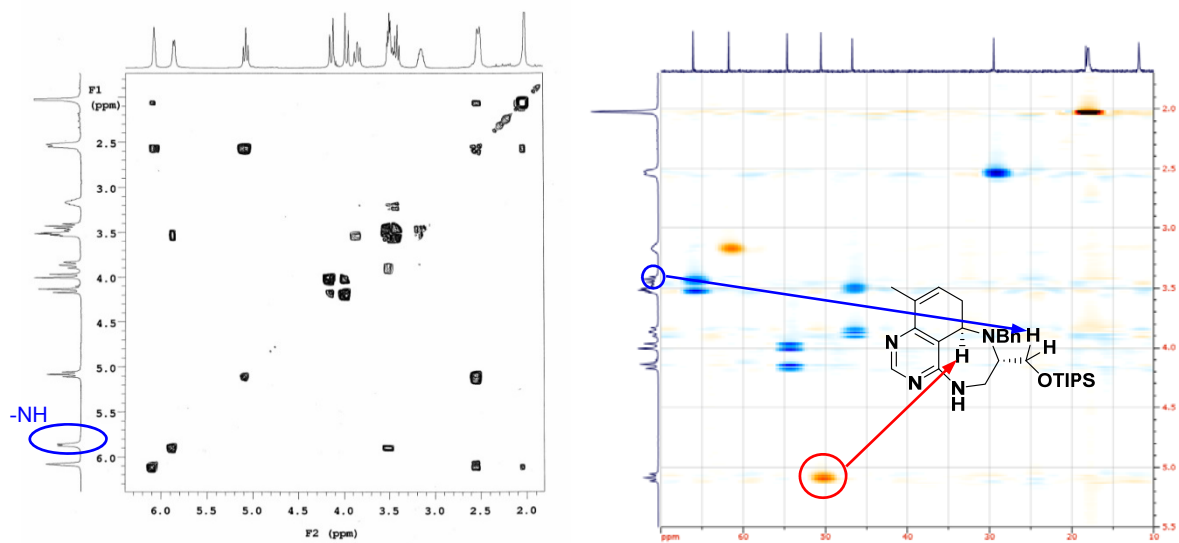

KJH\_DOS\_No8\_P31\_CDCL3\_400M\_proton  
 Selective band center: 5.09 (ppm); width: 32.9 (Hz)

Sample Name:  
 5d  
 Data Collected on:  
 Agilent-NMR-vnmrs400  
 Archive directory:  
 /home/vmar1/vmrsys/data/chulbom  
 Sample directory:  
 15-P56-2nd-17h\_20150404\_01  
 FidFile: KJH\_DOS\_No8\_P31\_CDCL3\_NOE\_400M\_

Pulse Sequence: NOESY1D  
 Solvent: cdcl3  
 Data collected on: Apr 14 2015

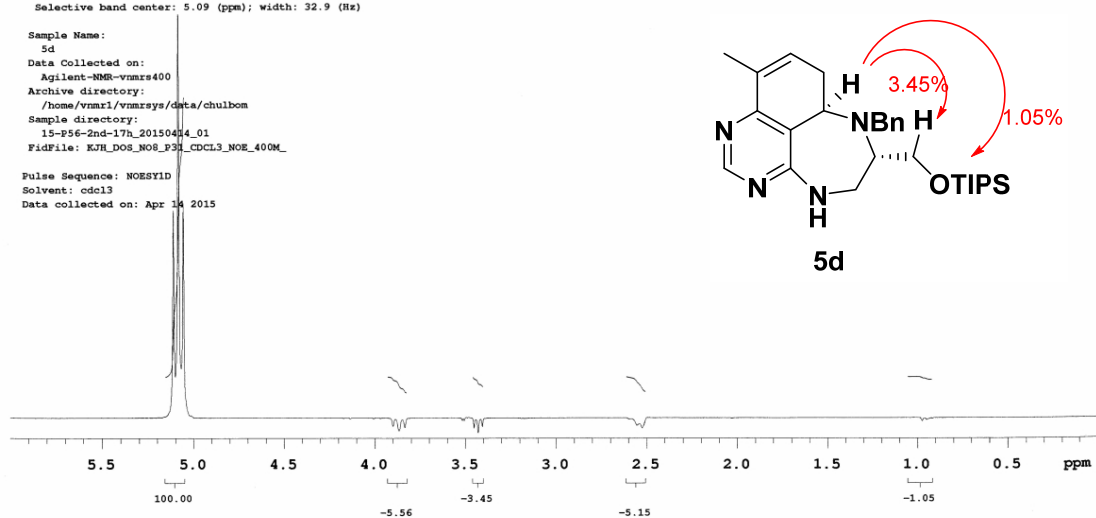

Supplementary Figure 37. HSQC and NOE spectra for **5d**.



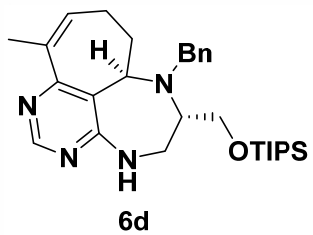

Pulse Sequence: zgpg30 (zgpg30)  
 Solvent: cdcl3  
 Data collected on: Apr 16 2015

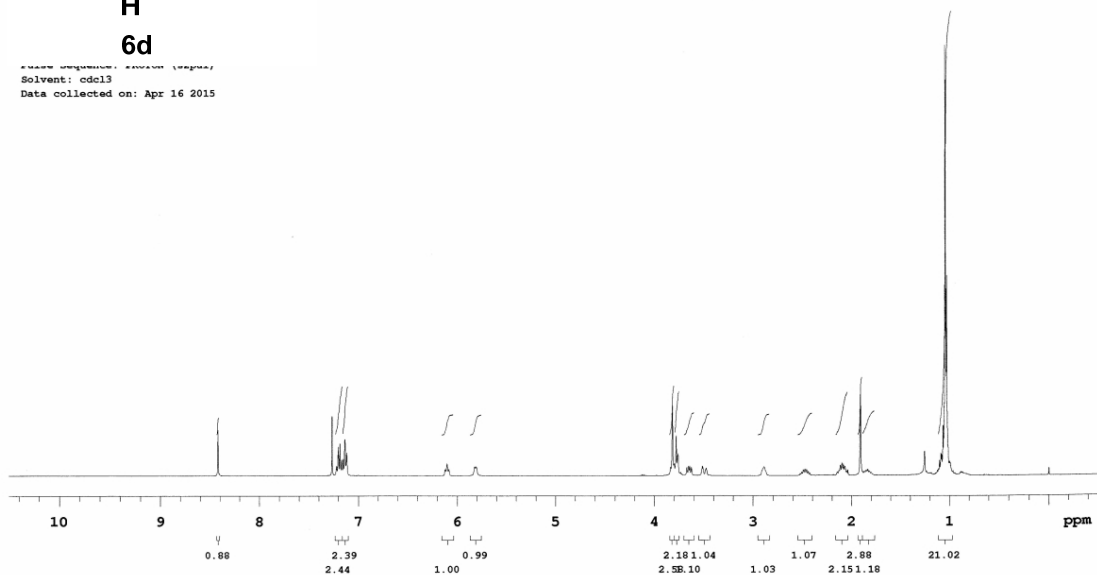

6d

Sample Name:  
 KJH\_DOS\_No8\_P34\_CDCL3\_Carbon\_400M  
 Data Collected on:  
 Agilent-NMR-vmrs400  
 Archive directory:  
 /home/vmm1/vmrsys/data/sbparc  
 Sample directory:  
 CYN\_20150414\_03006\_again\_20150414\_01  
 FidFile: KJH\_DOS\_No8\_P34\_CDCL3\_Carbon\_400M\_

Pulse Sequence: CARBON (s2pul)  
 Solvent: cdcl3  
 Data collected on: Apr 16 2015

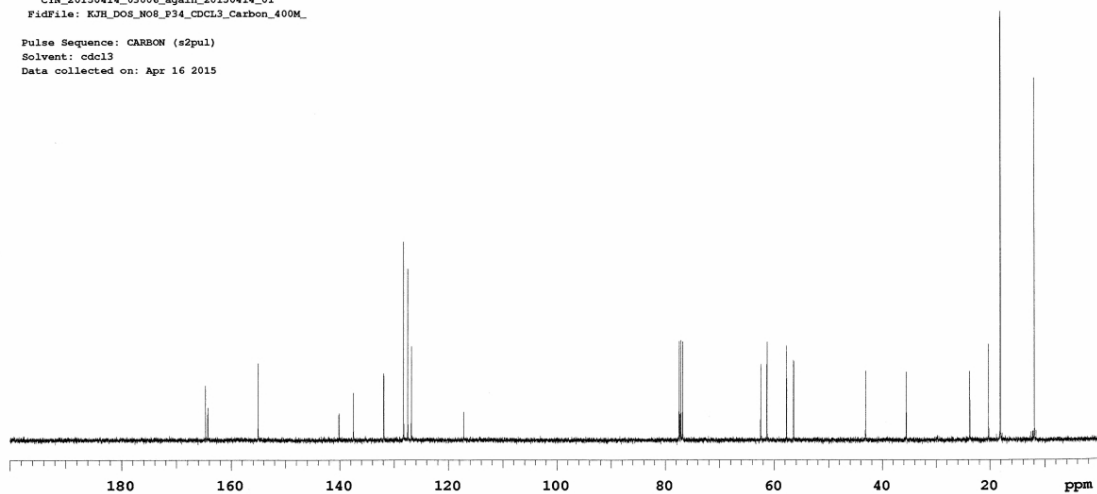

Supplementary Figure 38.  $^1\text{H}$  and  $^{13}\text{C}$  NMR spectra for **6d**.

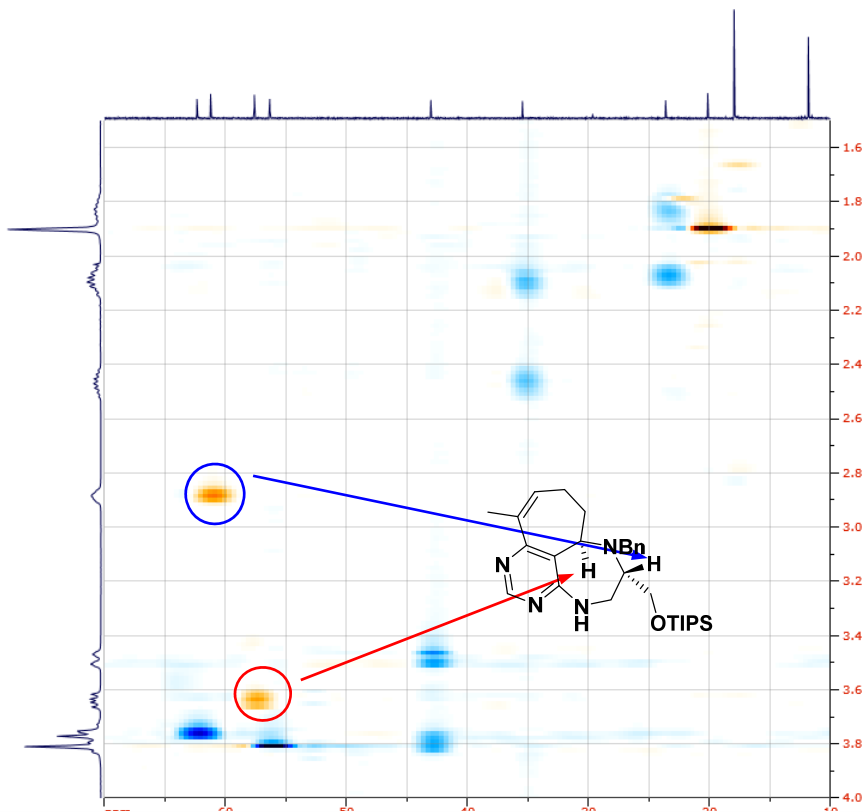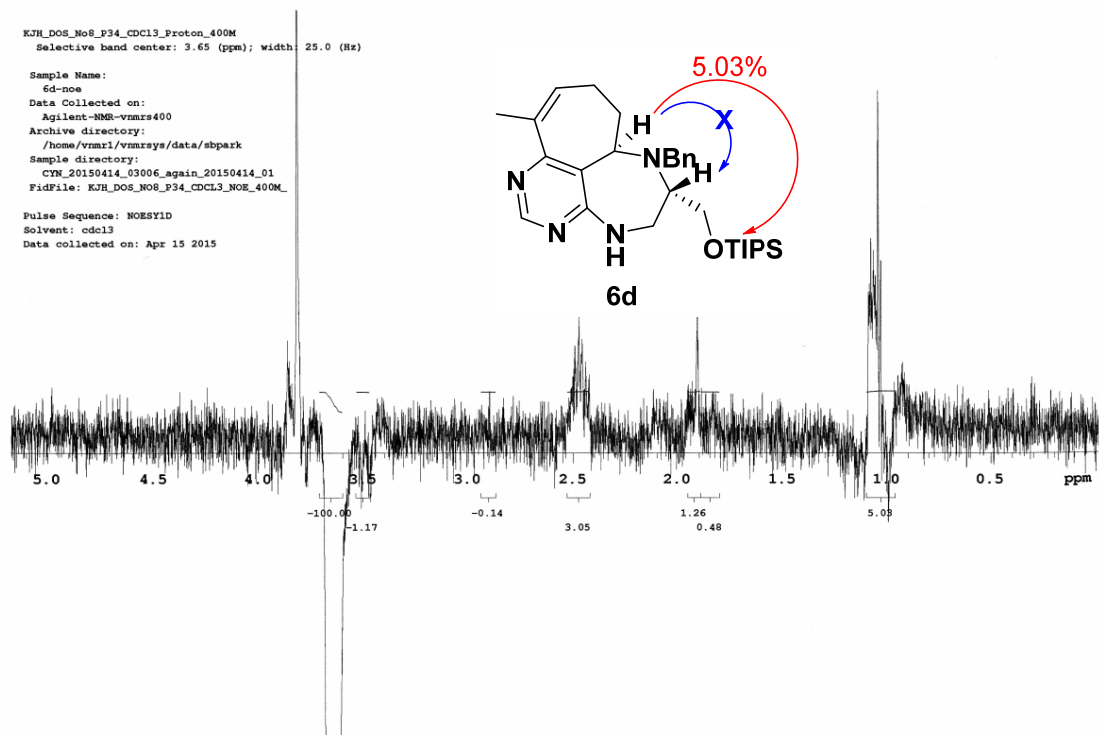

Supplementary Figure 39. HSQC and NOE spectra for 6d.

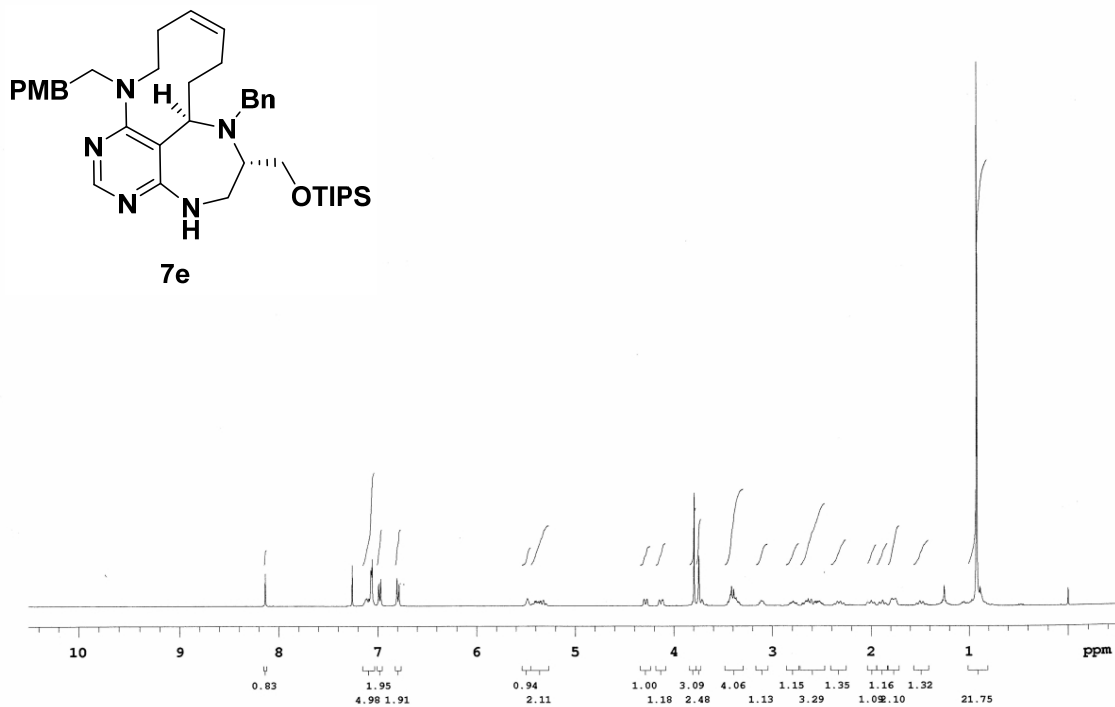

7e

Sample Name:  
KJH\_DOS\_No7\_P56\_CDCl3\_carbon\_400M  
Data Collected on:  
Agilent-NMR-vnmrs400  
Archive directory:  
/home/vnmr1/vnmrsys/data/sbpark  
Sample directory:  
EMJ\_2-78\_1H\_Methanol\_20141008\_20141008\_01  
FidFile: KJH\_DOS\_No7\_P56\_CDCl3\_Carbon\_400M  
Pulse Sequence: CARBON (s2pul)  
Solvent: cd3od  
Data collected on: Oct 9 2014

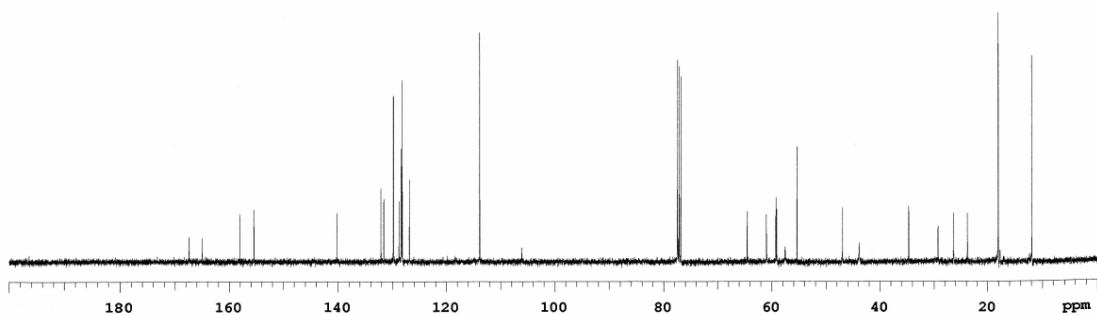

Supplementary Figure 40.  $^1\text{H}$  and  $^{13}\text{C}$  NMR spectra for **7e**.

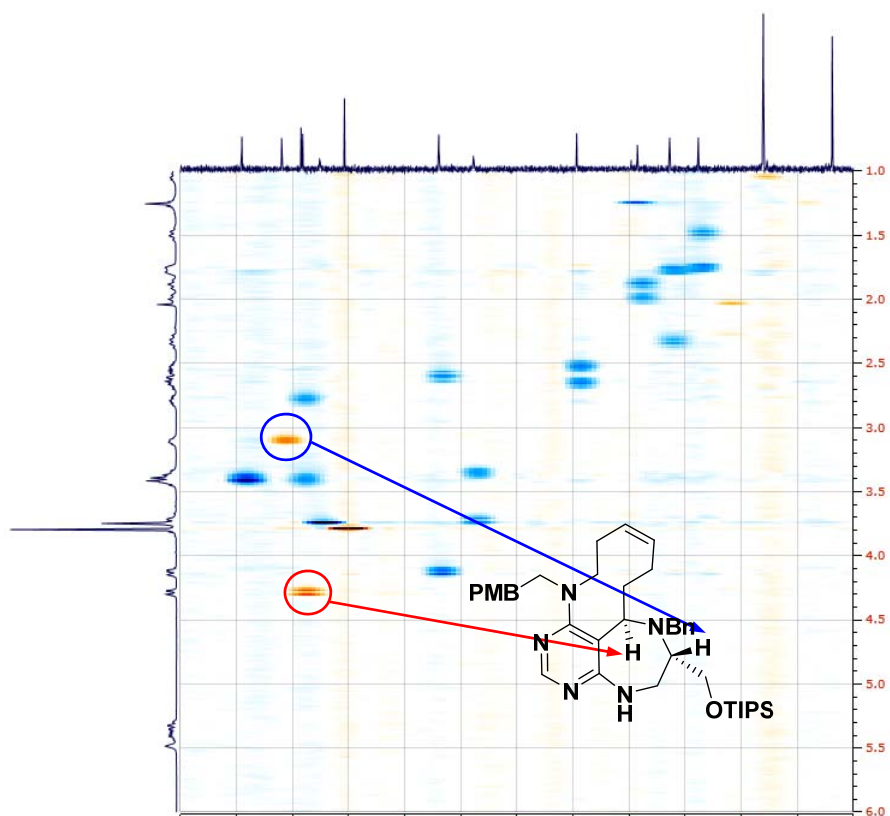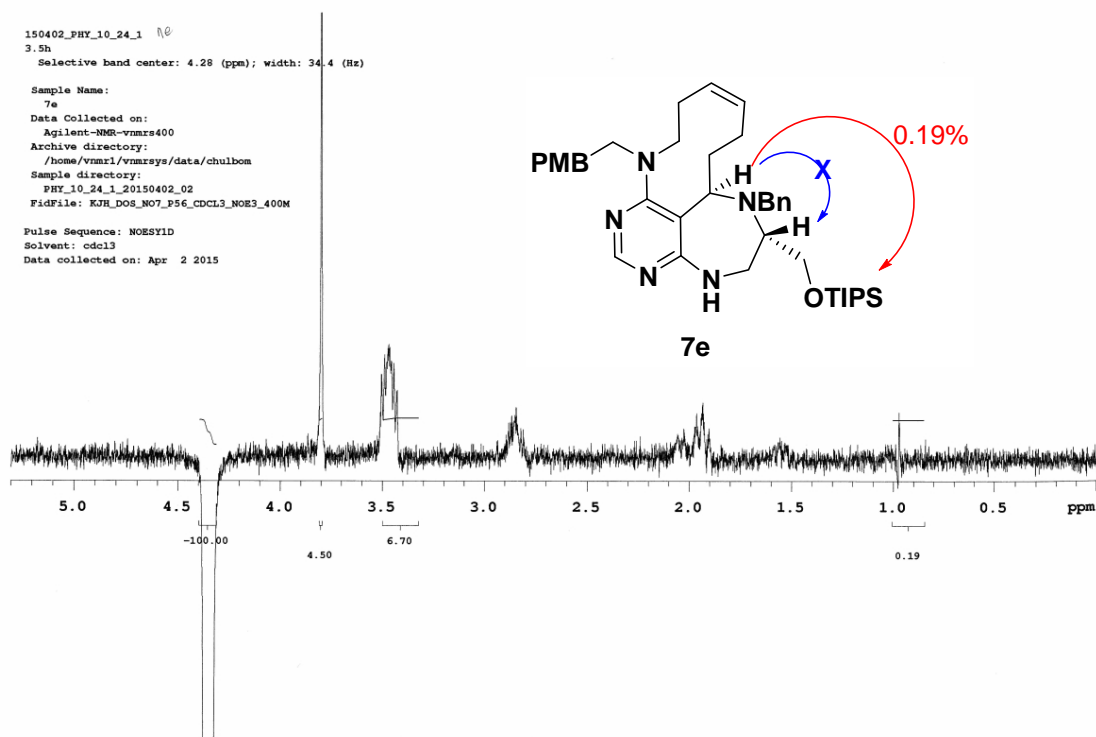

Supplementary Figure 41. HSQC and NOE spectra for 7e.



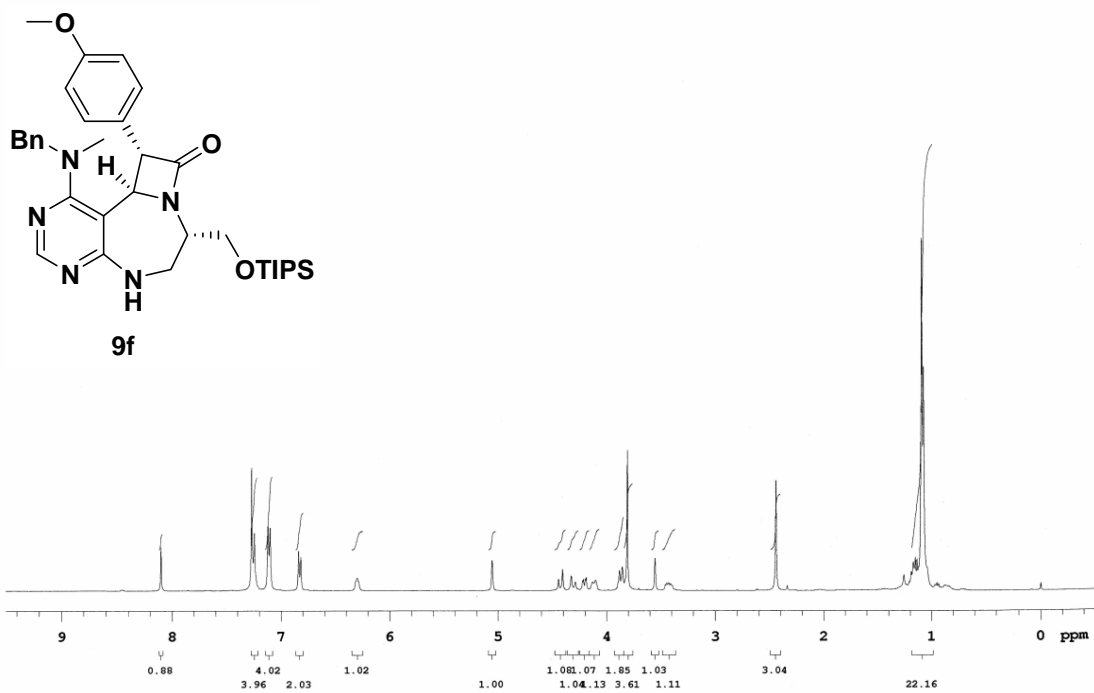

9f

Sample Name: KJH\_DOS\_No7\_F100\_Major  
 Data Collected on: Agilent-NMR-vmrs400  
 Archive directory: /home/vmmr1/vmrsys/data/sbparc  
 Sample directory: KJH\_DOS\_No7\_F100\_Major\_20141205\_01  
 FidFile: KJH\_DOS\_No7\_F101\_CDCL3\_Carbon\_400M\_

Pulse Sequence: CARBON (s2pul1)  
 Solvent: cdcl3  
 Data collected on: Dec 8 2014

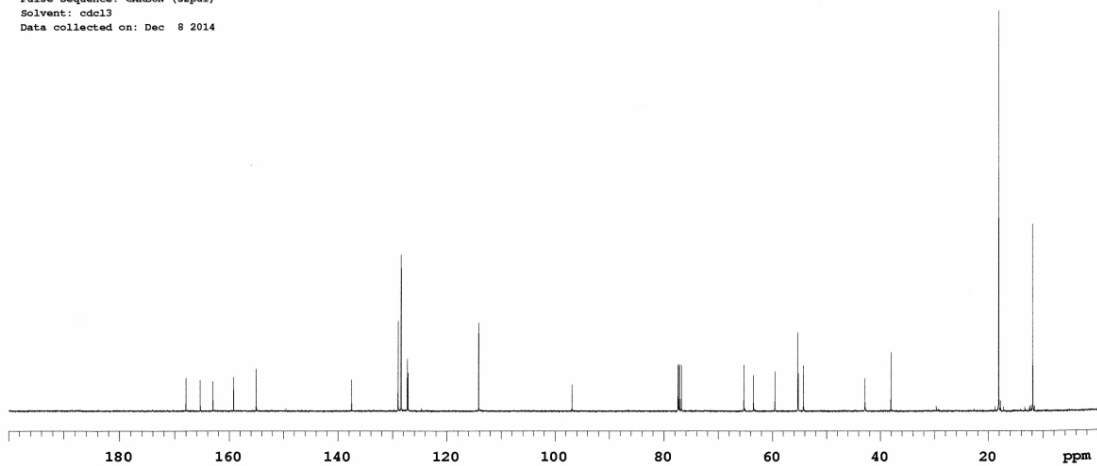

Supplementary Figure 43.  $^1\text{H}$  and  $^{13}\text{C}$  NMR spectra for **9f**.

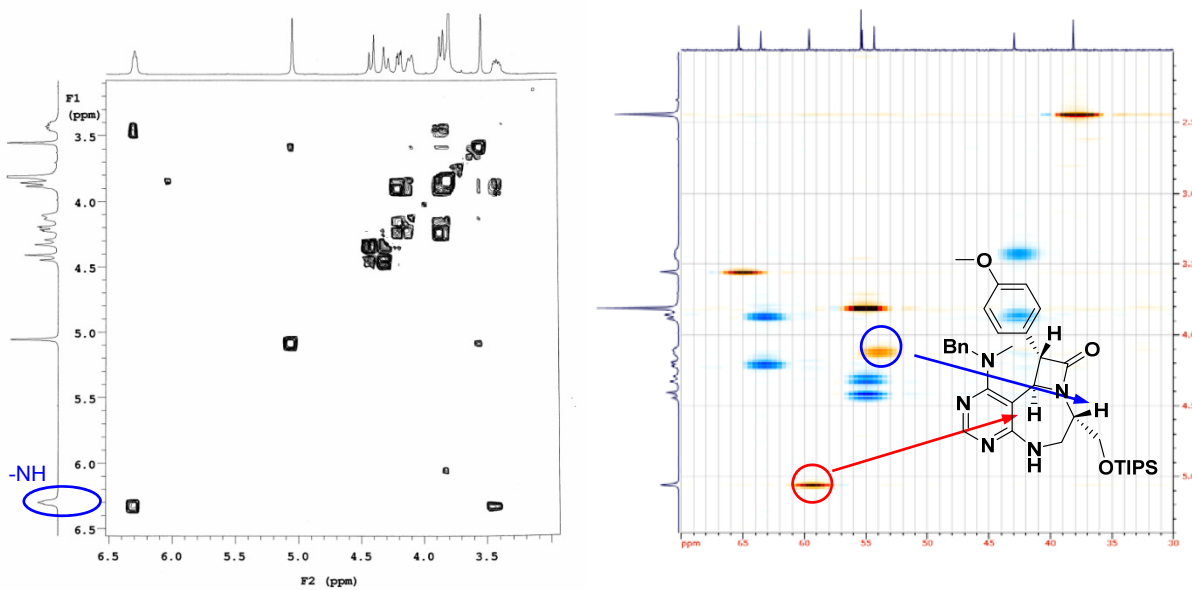

KJH\_DOS\_No7\_F101\_CDCL3\_proton\_400M  
 Selective band center: 5.06 (ppm); width: 9.8 (Hz)

Sample Name:  
 9f-noe

Data Collected on:  
 Agilent-NMR-vnmrs400

Archive directory:  
 /home/vnmr1/vnmrsys/data/chulbon

Sample directory:  
 SHH\_12059\_B\_20141205\_02

FidFile: KJH\_DOS\_No7\_F101\_CDCL3\_NOE2\_400M\_

Pulse Sequence: NOESY1D  
 Solvent: cdcl3  
 Data collected on: Dec 8 2014

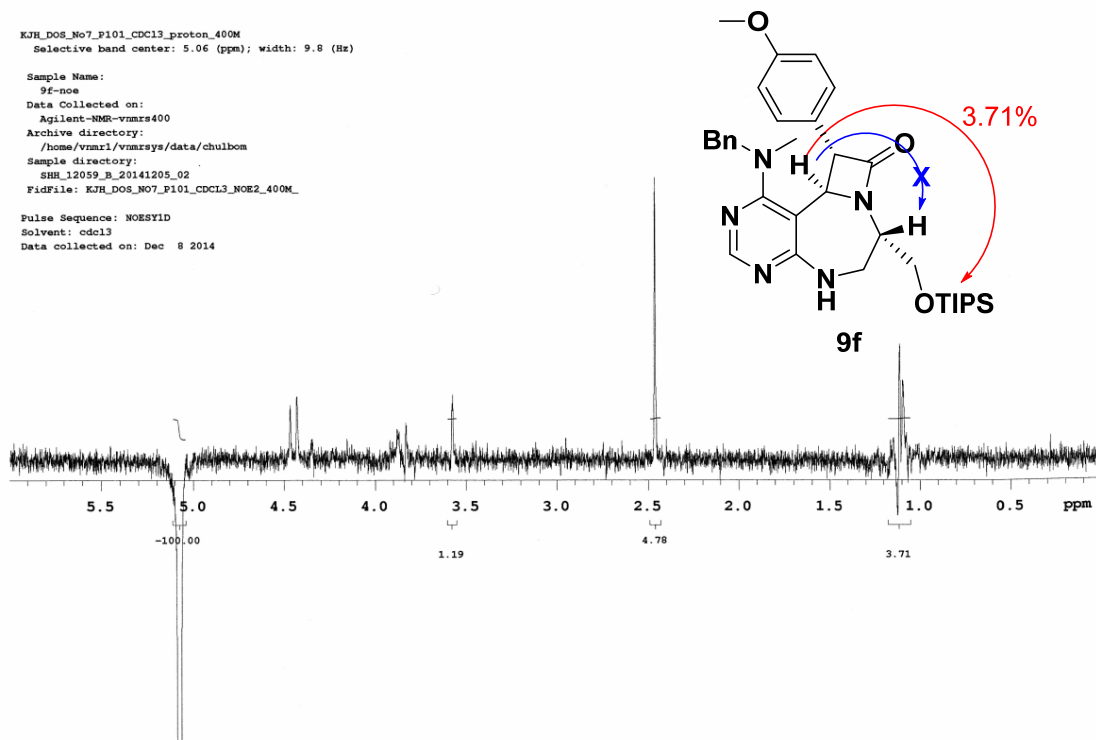

Supplementary Figure 44. COSY, HSQC and NOE spectra for **9f**.

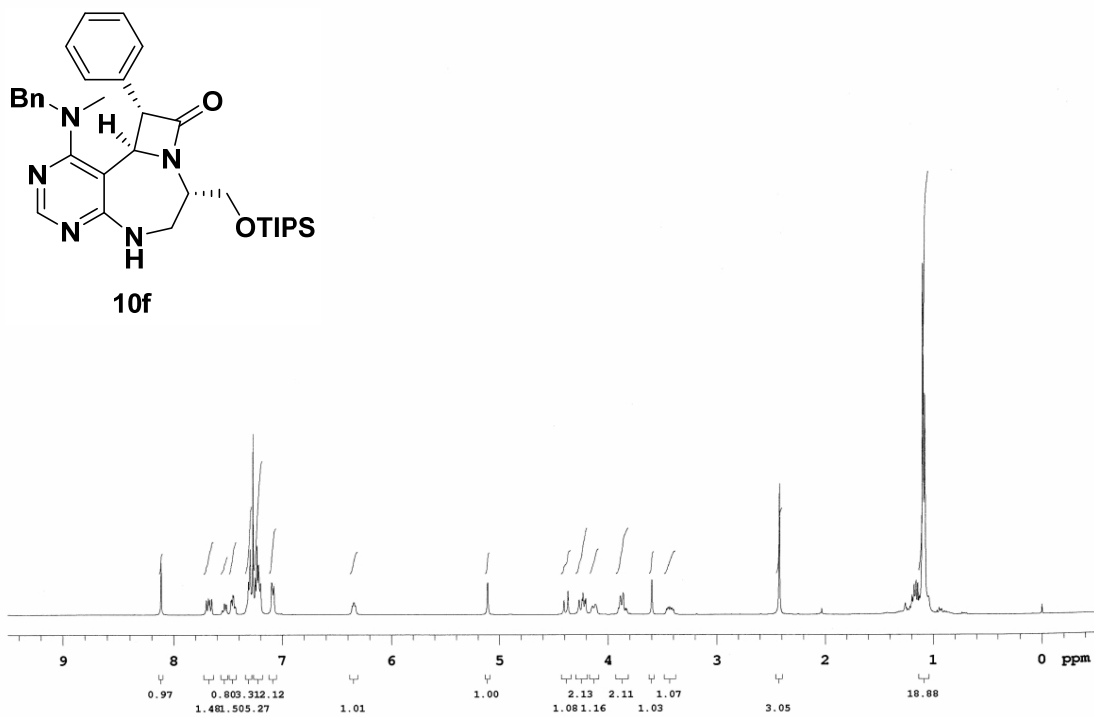

10f

Sample Name:  
 KJH\_DOS\_NO7\_F102\_CDCl3\_Carbon\_400M  
 Data Collected on:  
 Agilent-NMR-vmrs400  
 Archive directory:  
 /home/vmr1/vmrsys/data/sbparc  
 Sample directory:  
 KC\_bwalbp\_141126\_20141126\_01  
 FidFile: KJH\_DOS\_NO7\_F102\_CDCl3\_Carbon\_400M\_

Pulse Sequence: CARBON (s2pul)  
 Solvent: cdcl3  
 Data collected on: Dec 9 2014

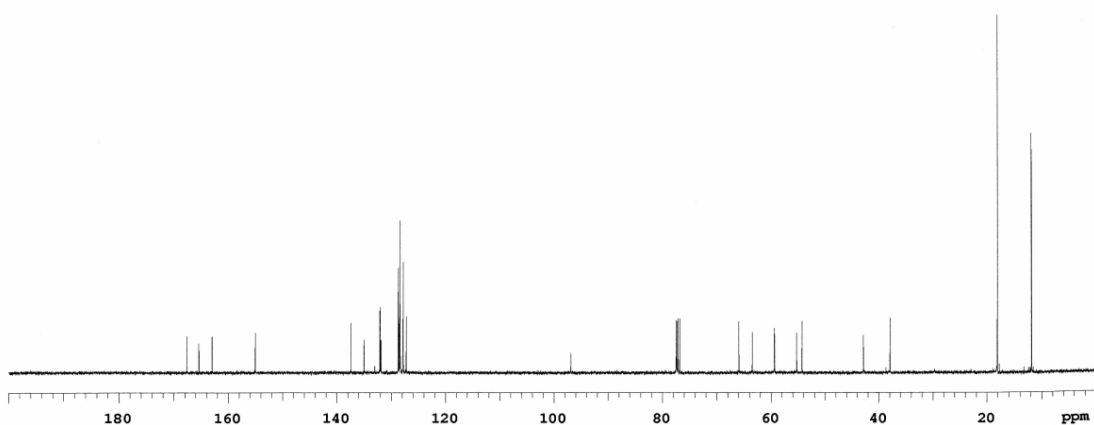

Supplementary Figure 45.  $^1\text{H}$  and  $^{13}\text{C}$  NMR spectra for **10f**.



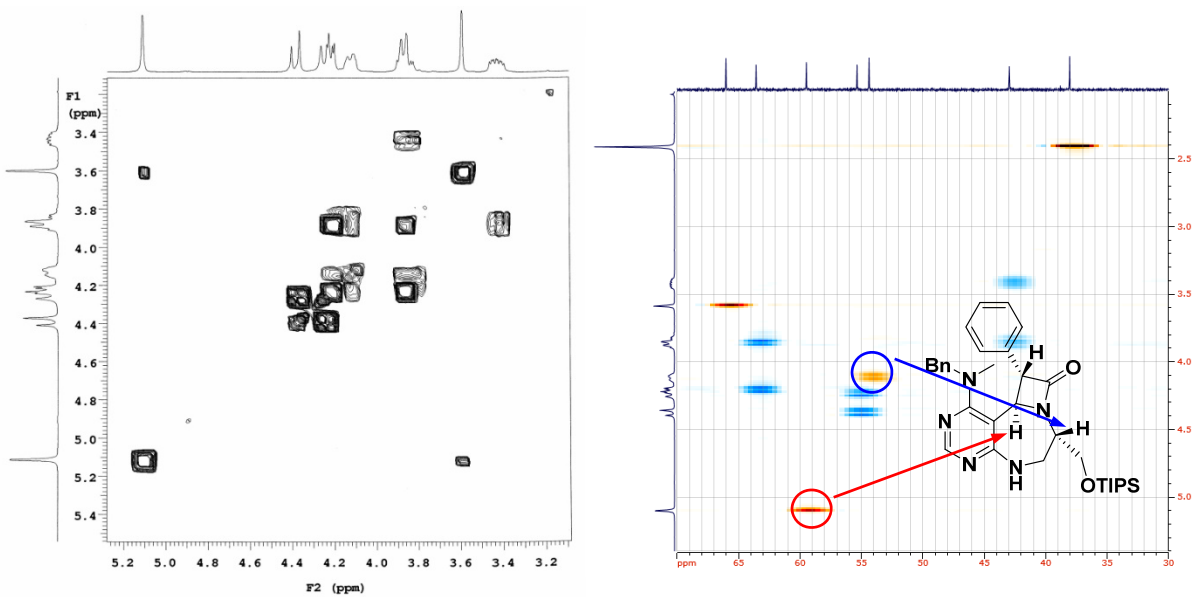

KJH\_DOS\_NOT\_F102\_CDCL3\_Proton\_400M  
 Selective band center: 5.10 (ppm); width: 22.6 (Hz)

Sample Name:  
 10f-noe

Data Collected on:  
 Agilent-NMR-vmrs400

Archive directory:  
 /home/vmmr1/vmrsys/data/chulbon

Sample directory:  
 15-P14-crude\_20141209\_01

FidFile: KJH\_DOS\_NOT\_F102\_CDCL3\_NOE\_400M\_

Pulse Sequence: NOESY1D  
 Solvent: cdcl3  
 Data collected on: Dec 9 2014

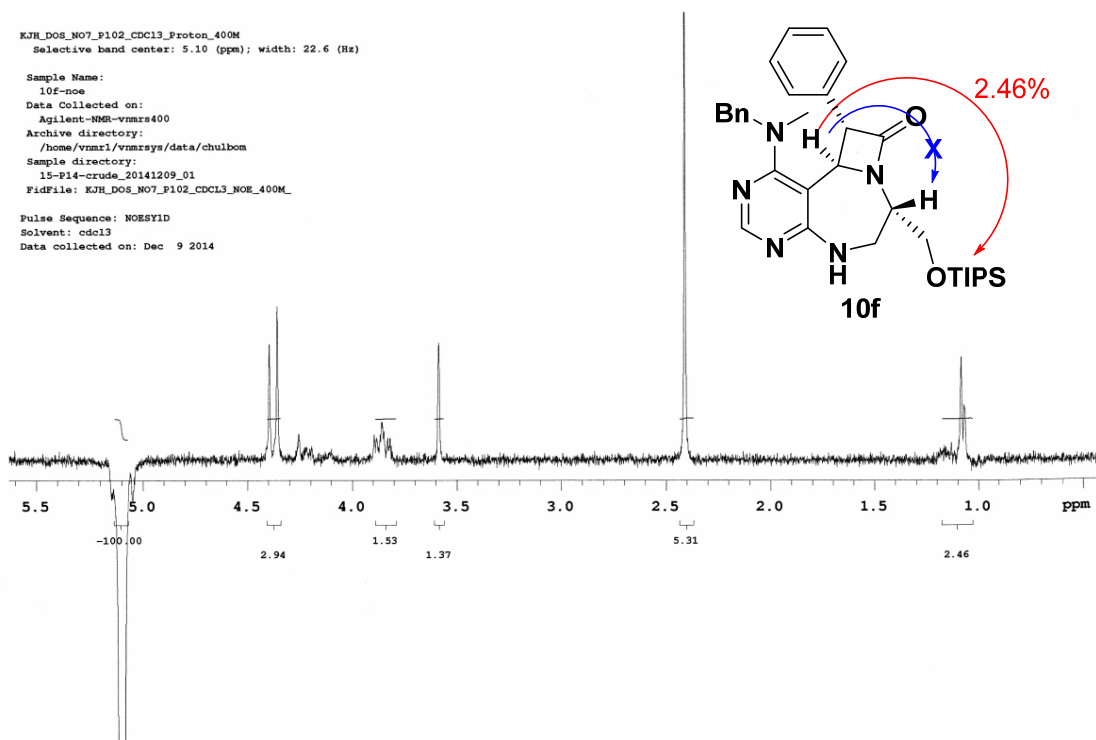

Supplementary Figure 46. COSY, HSQC and NOE spectra for 10f.

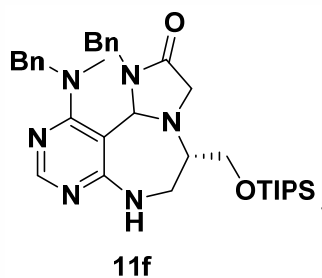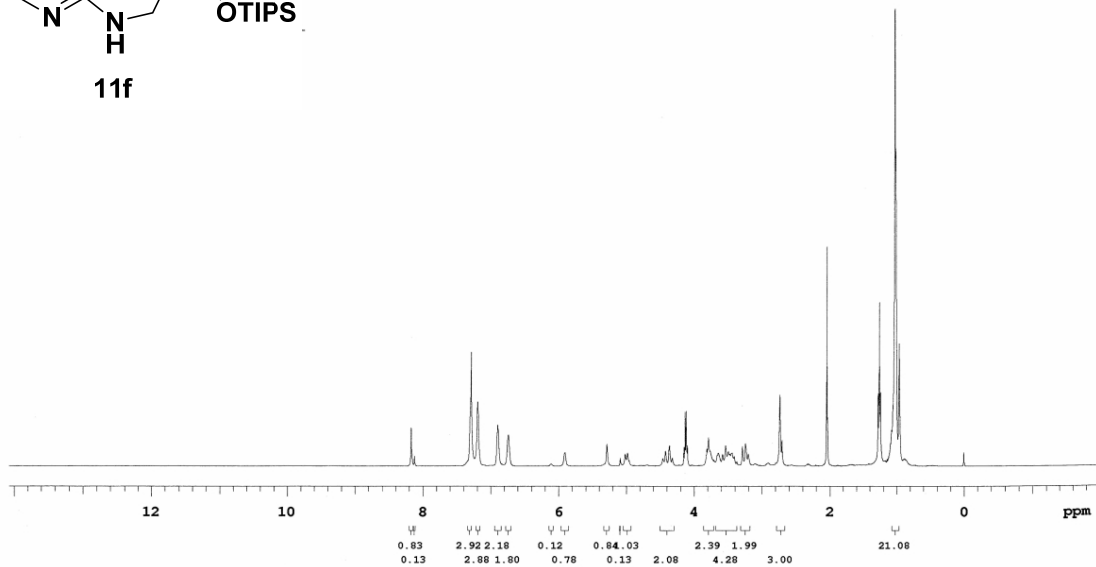

11f

Sample Name:  
 KJH\_DOS\_No8\_P28\_CDCL3\_Carbon\_400M  
 Data Collected on:  
 Agilent-NMR-vnmrs400  
 Archive directory:  
 /home/vmar1/vnmrsys/data/chulbon  
 Sample directory:  
 JDS\_15\_026\_2\_20150416\_01  
 FidFile: KJH\_DOS\_No8\_P28\_CDCL3\_Carbon\_400M\_

Pulse Sequence: CARBON (s2pul)  
 Solvent: cdcl3  
 Data collected on: Apr 22 2015

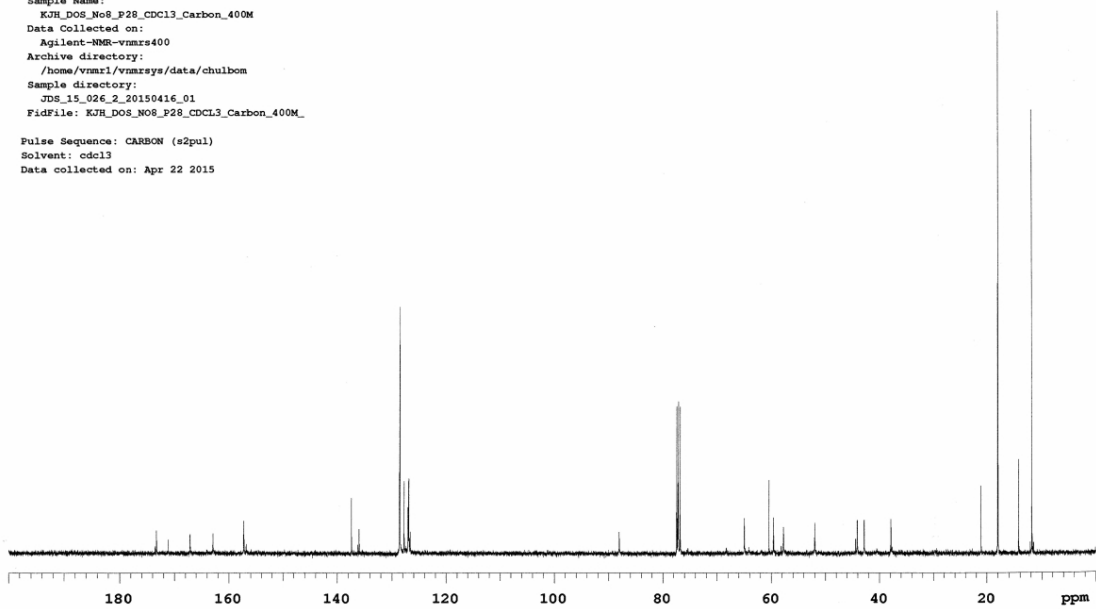

**Supplementary Figure 47.**  $^1\text{H}$  and  $^{13}\text{C}$  NMR spectra for **11f**.

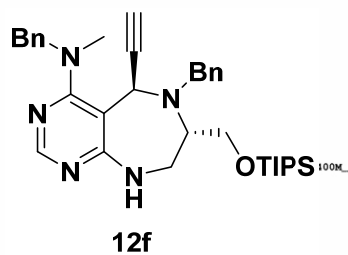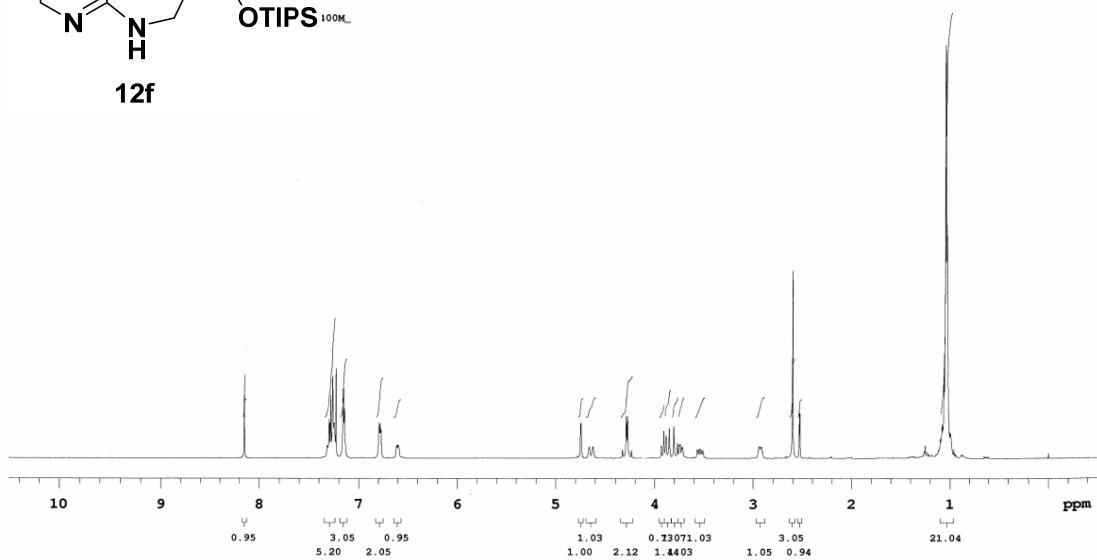

12f

Sample Name:  
KJH2  
Data Collected on:  
Agilent-NMR-vmrs400  
Archive directory:  
/home/vmrs1/vmrsys/data/sbparc  
Sample directory:  
KJH2\_20141204\_01  
FidFile: KJH\_DOS\_NO7\_F100\_CDCL3\_Major\_Carbon\_400M\_

Pulse Sequence: CARBON (s2pul)  
Solvent: cdcl3  
Data collected on: Dec 4 2014

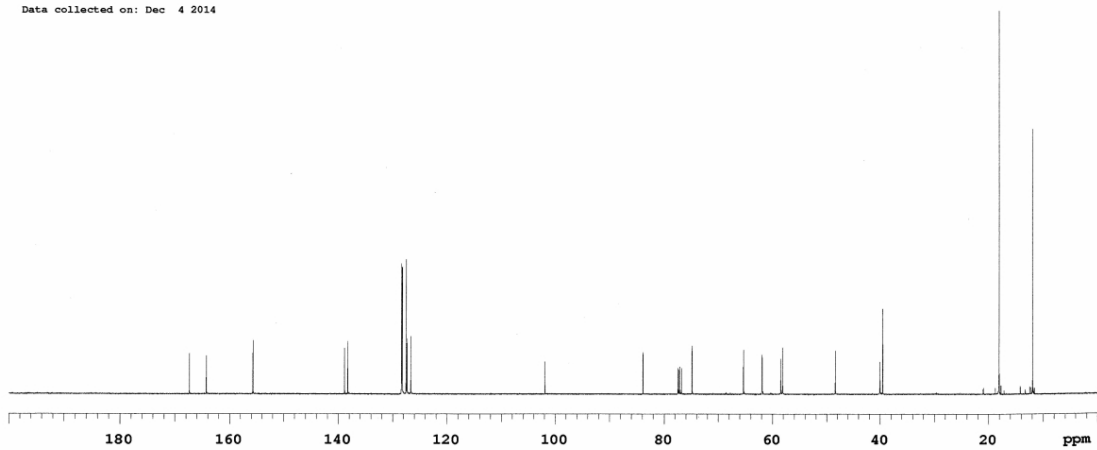

**Supplementary Figure 48.**  $^1\text{H}$  and  $^{13}\text{C}$  NMR spectra for **12f**.

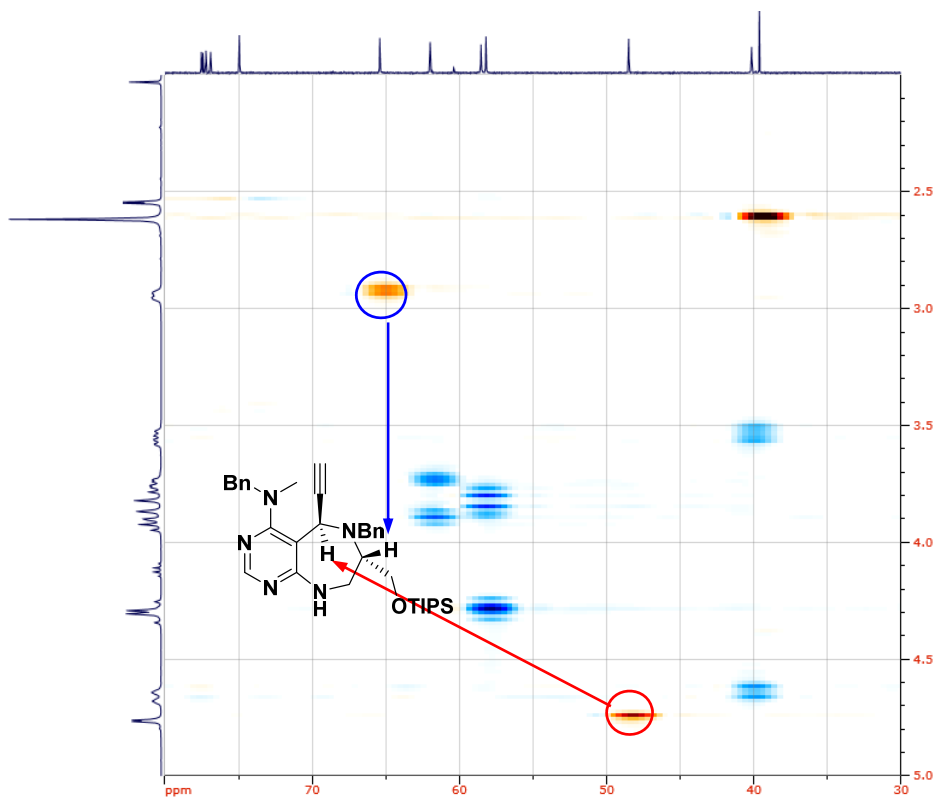

KJH\_DOS\_NOT\_P100\_Major\_CDCL3\_NOE\_400M  
 Selective band center: 4.77 (ppm); width: 12.7 (Hz)  
 Sample Name:  
 12f\_noe  
 Data Collected on:  
 Agilent-NMR-vmrs400  
 Archive directory:  
 /home/vmr1/vmrsys/data/chulbon  
 Sample directory:  
 14\_20141202\_01  
 FidFile: KJH\_DOS\_NOT\_P100\_CDCL3\_Major\_NOE\_400M  
 Pulse Sequence: NOESY1D  
 Solvent: cdcl3  
 Data collected on: Dec 4 2014

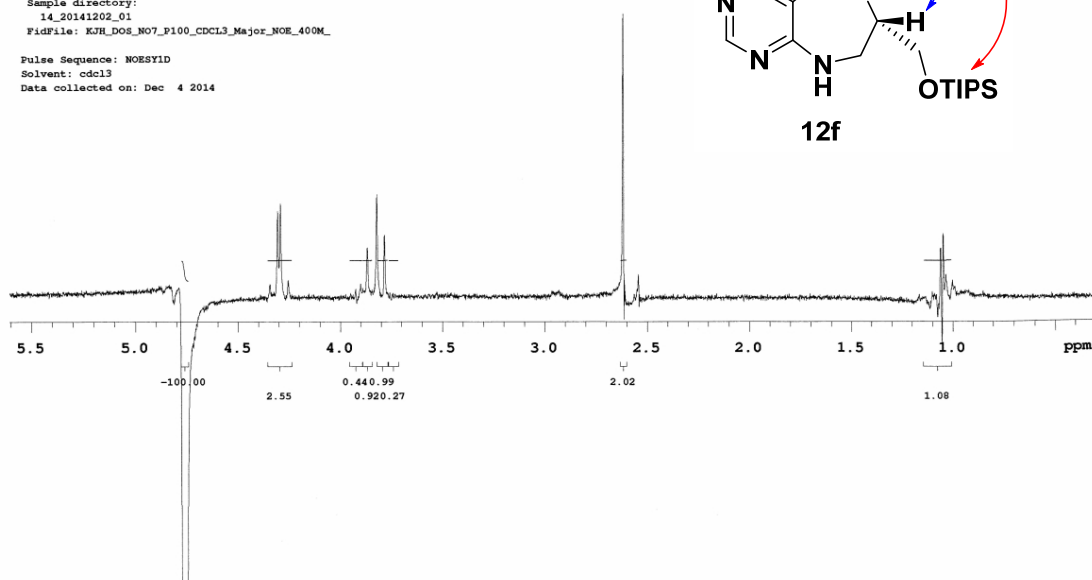

**Supplementary Figure 49.** HSQC and NOE spectra for **12f**.

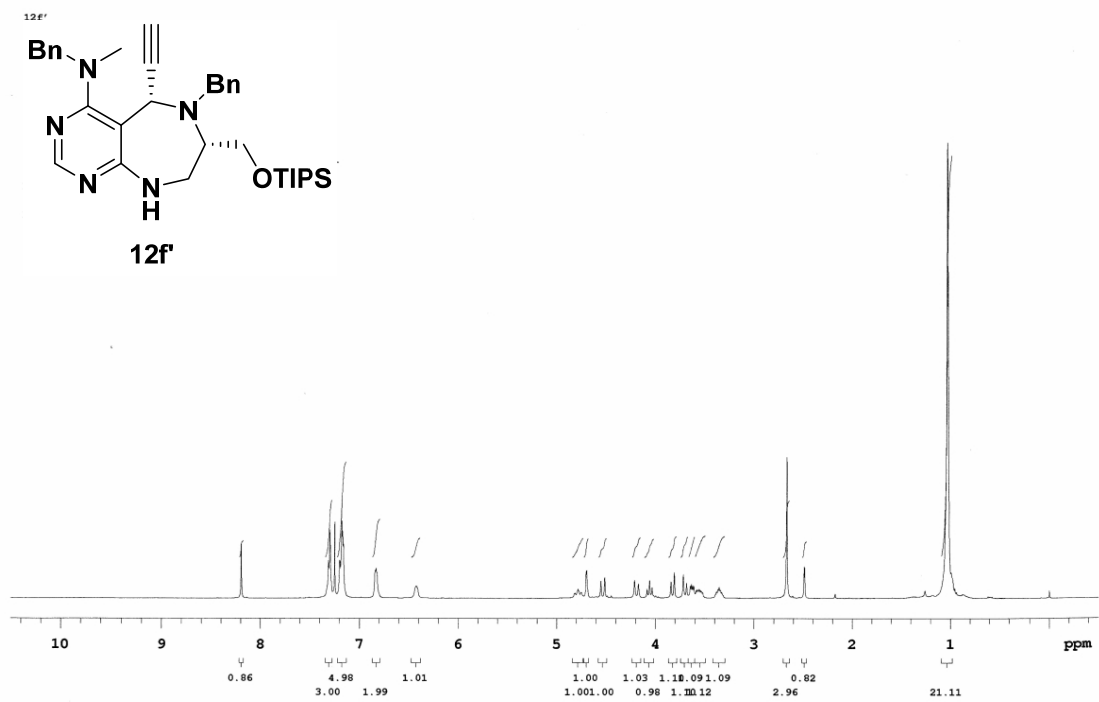

KJH\_DOS\_N07\_P97\_CDCL3\_carbon\_400M

Sample Name:  
12f'

Data Collected on:  
Agilent-NMR-vmrs400

Archive directory:  
/home/vmr1/vmrsys/data/sbark

Sample directory:  
KC\_bvalbp\_141126\_20141126\_01

FidFile: KJH\_DOS\_N07\_P100\_CDCL3\_carbon\_400M\_

Pulse Sequence: CARBON (s2pul)

Solvent: cdcl3

Data collected on: Dec 3 2014

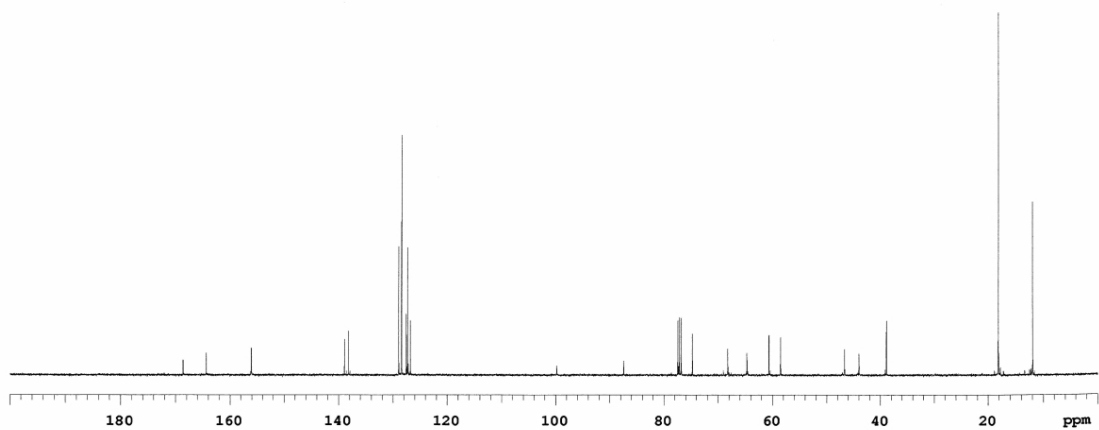

Supplementary Figure 50.  $^1\text{H}$  and  $^{13}\text{C}$  NMR spectra for **12f'**.

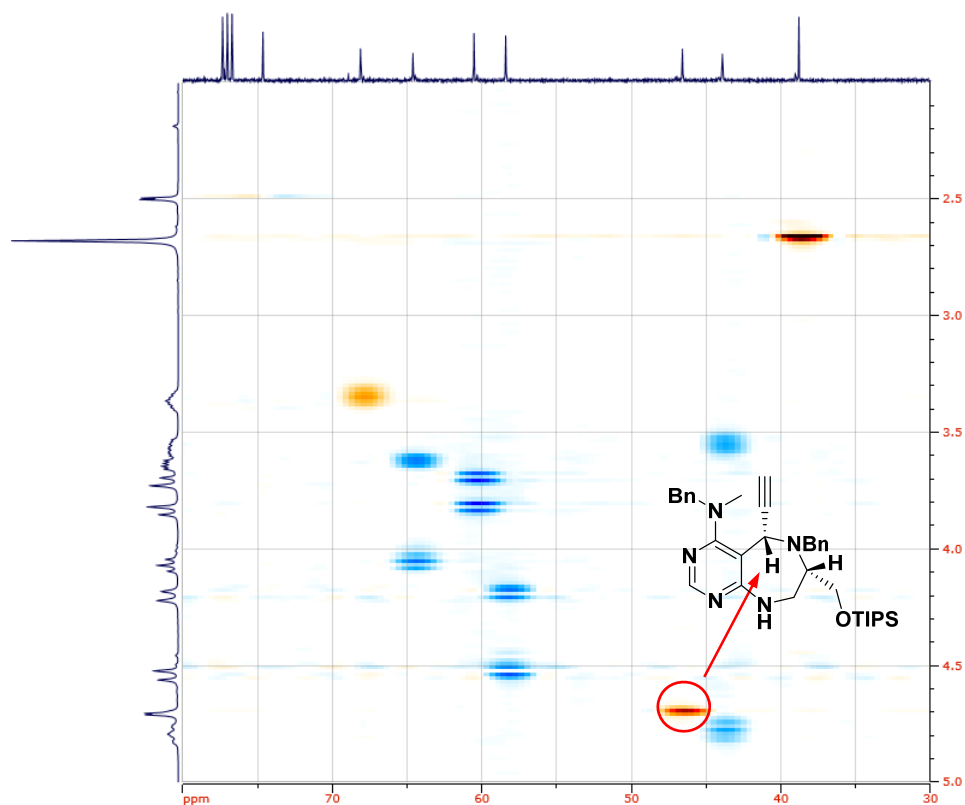

KJH\_DOS\_NO7\_P100\_CDCL3\_proton\_400M  
 Selective band center: 4.71 (ppm); width: 14.9 (Hz)

Sample Name:  
 12f'\_noe

Data Collected on:  
 Agilent-NMR-vmrs400

Archive directory:  
 /home/vmm1/vmrsys/data/sbark

Sample directory:  
 KC\_bvalbp\_141126\_20141126\_01

FidFile: KJH\_DOS\_NO7\_P100\_CDCL3\_NOE2\_NEW\_400M

Pulse Sequence: NOESY1D  
 Solvent: cdcl3  
 Data collected on: Dec 9 2014

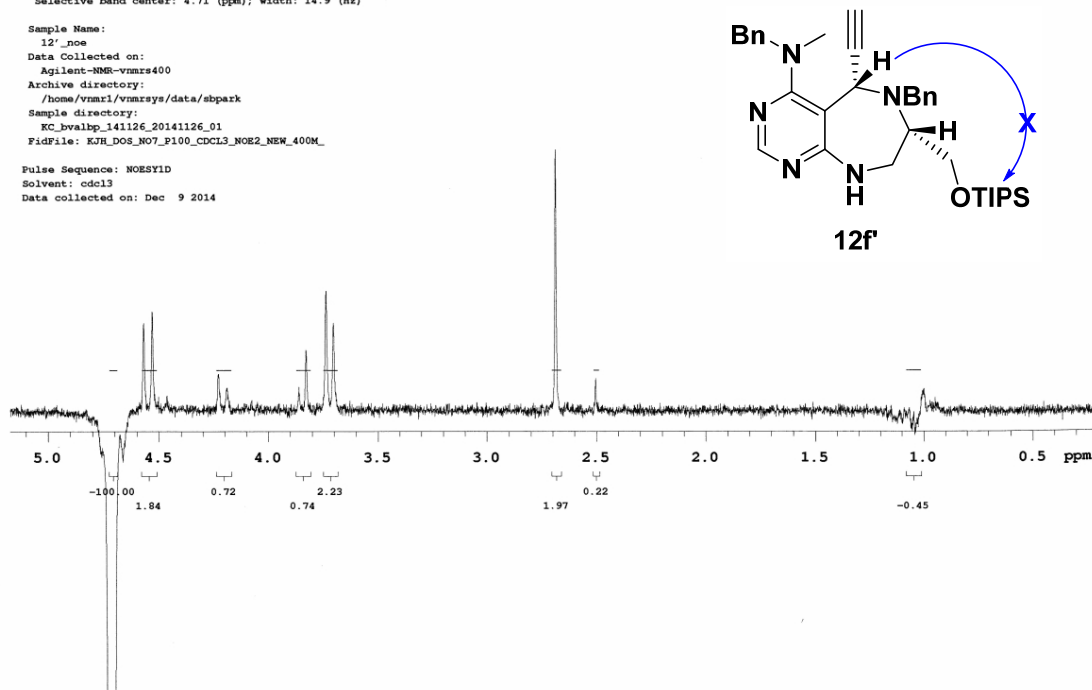

Supplementary Figure 51. HSQC and NOE spectra for **12f'**.

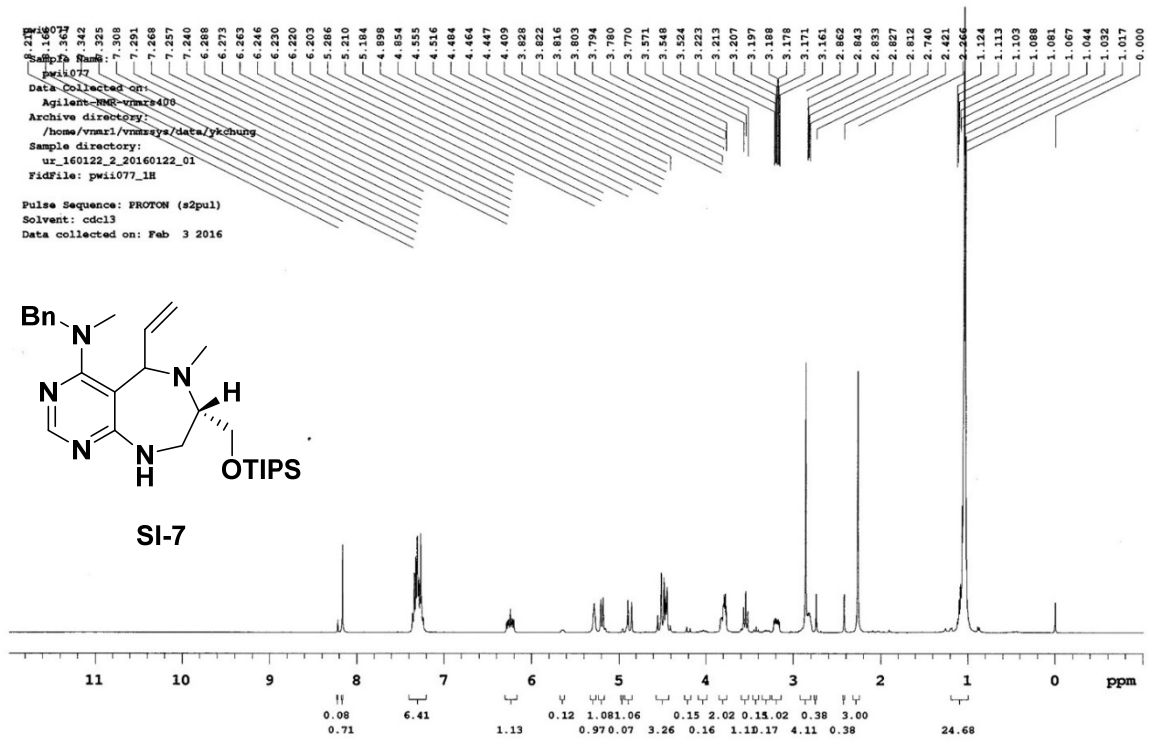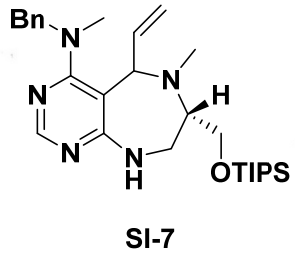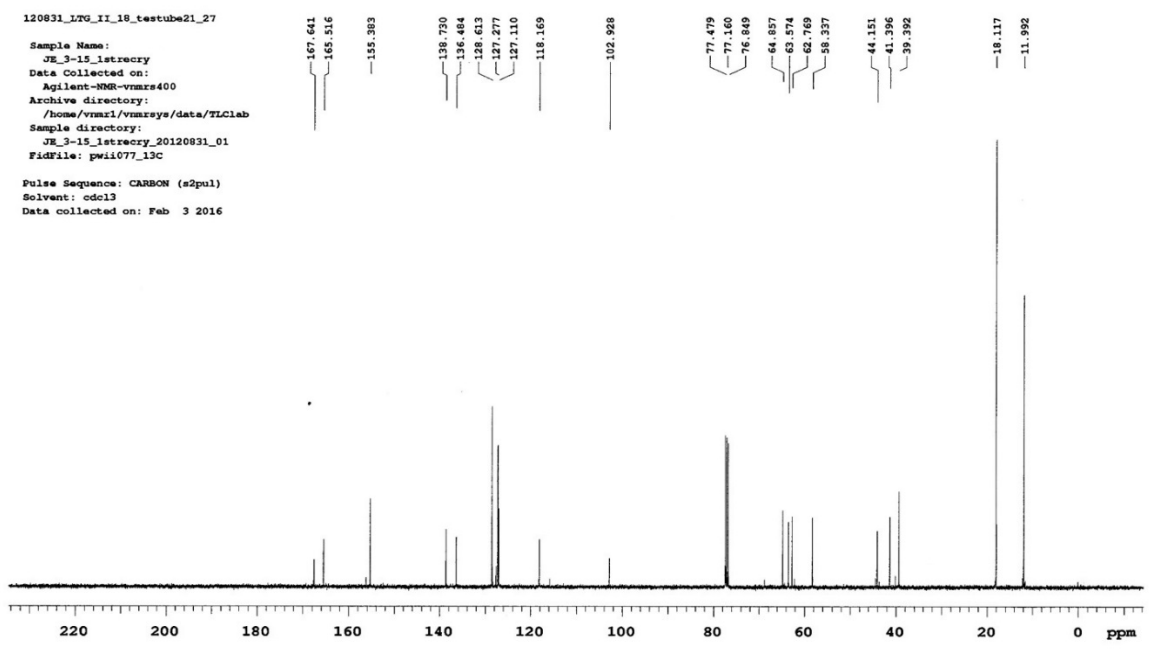

Supplementary Figure 52. <sup>1</sup>H and <sup>13</sup>C NMR spectra for SI-7.

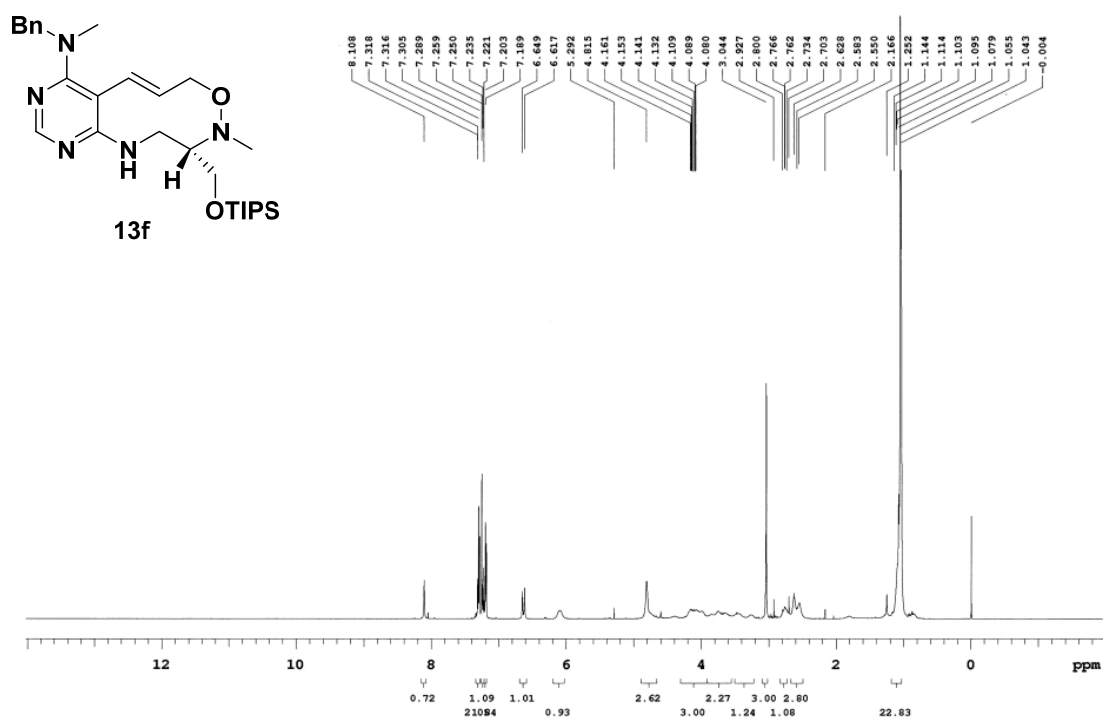

Supplementary Figure 53.  $^1\text{H}$  NMR spectra for **13f**.



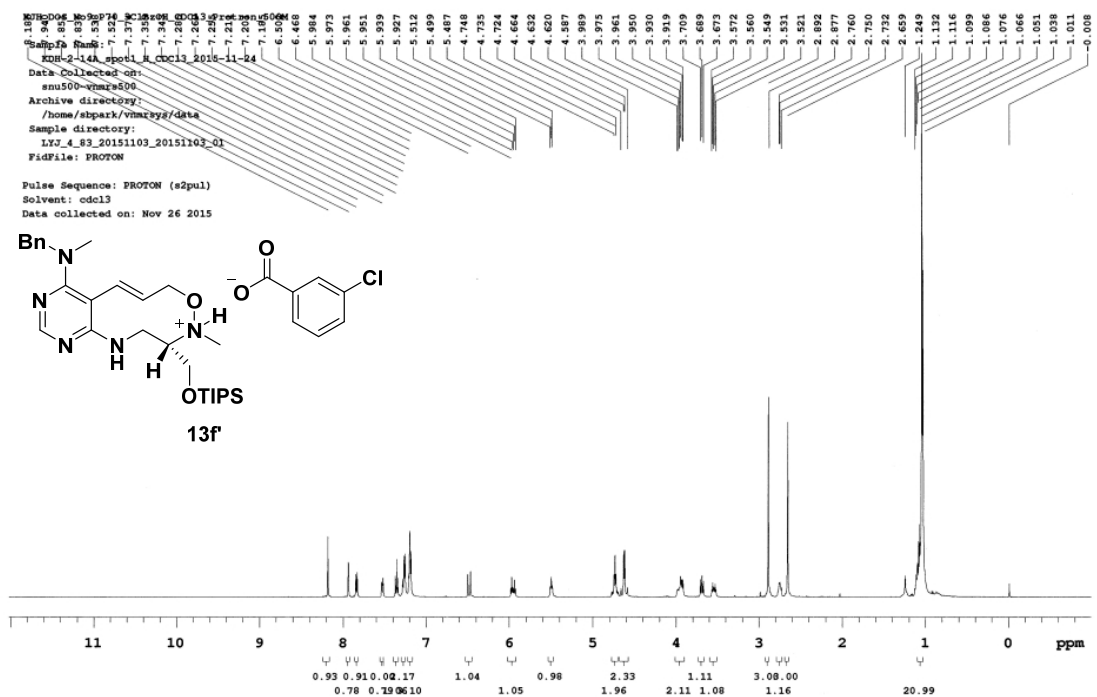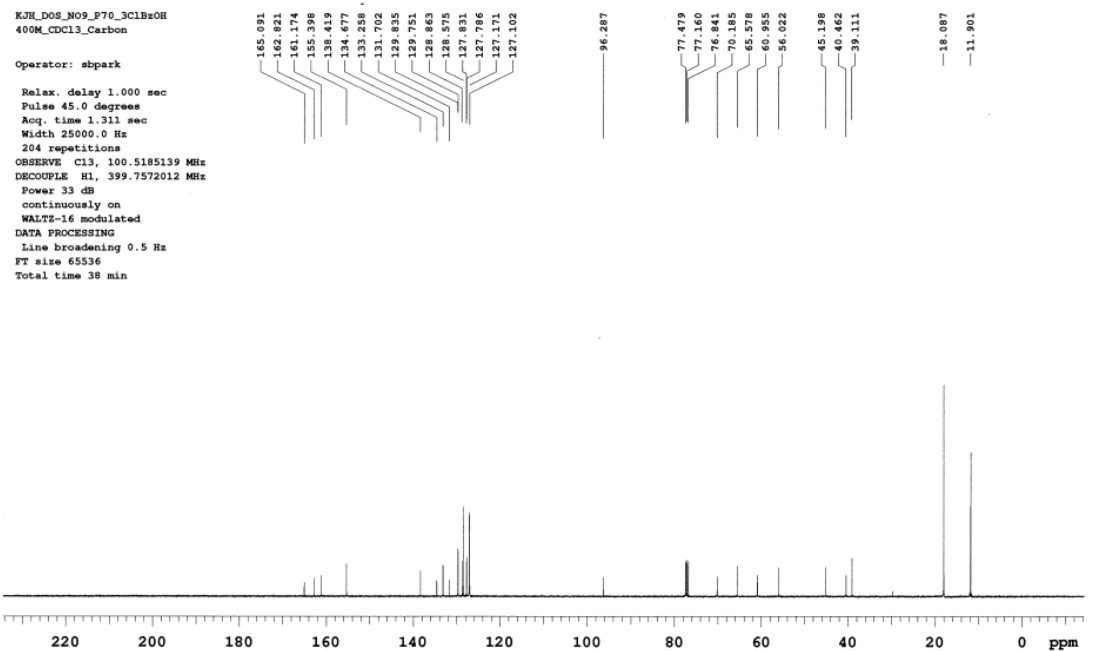

Supplementary Figure 54. <sup>1</sup>H and <sup>13</sup>C NMR spectra for **13f'**.

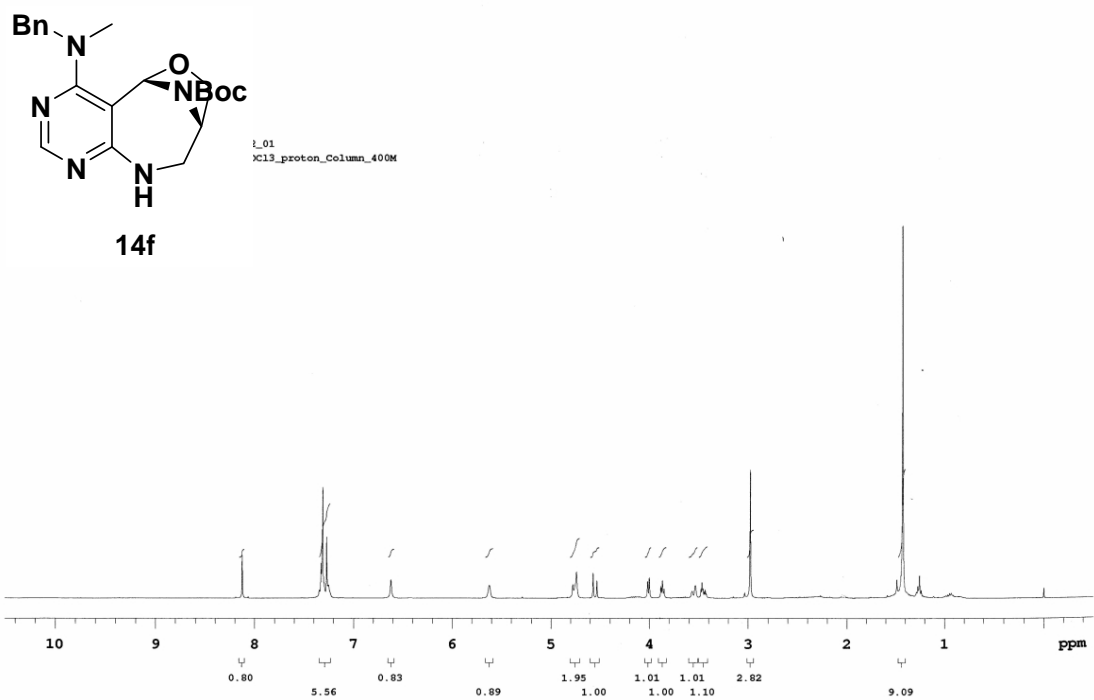

13f

Sample Name:  
13f

Data Collected on:  
Agilent-NMR-vnmrs400

Archive directory:  
/home/vnmr1/vnmrsys/data/dykchen

Sample directory:  
aj\_3-65\_f2\_20140704\_01

FidFile: KJH\_DOS\_NO6\_P106\_Product\_CDC13\_carbon\_Column\_400M

Pulse Sequence: CARBON (s2pul)

Solvent: cd3cn

Data collected on: Jul 5 2014

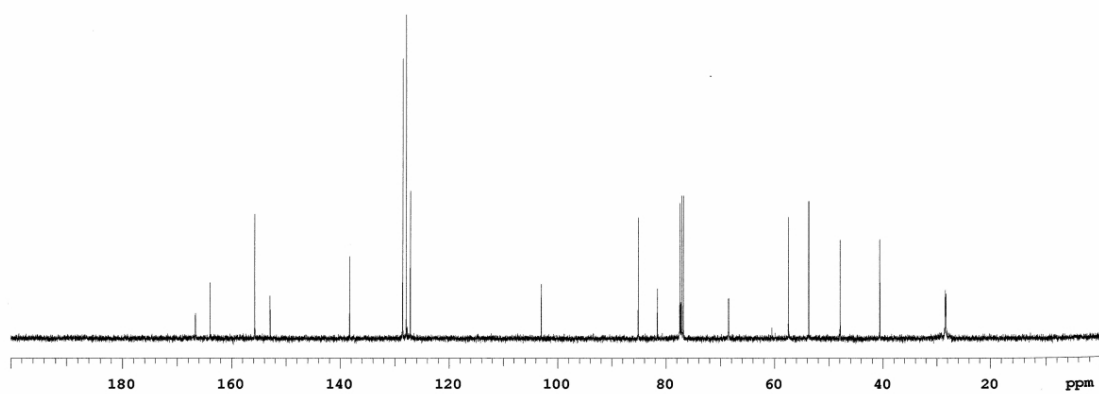

**Supplementary Figure 55.**  $^1\text{H}$  and  $^{13}\text{C}$  NMR spectra for **14f**.

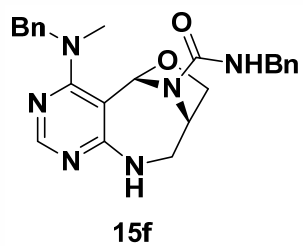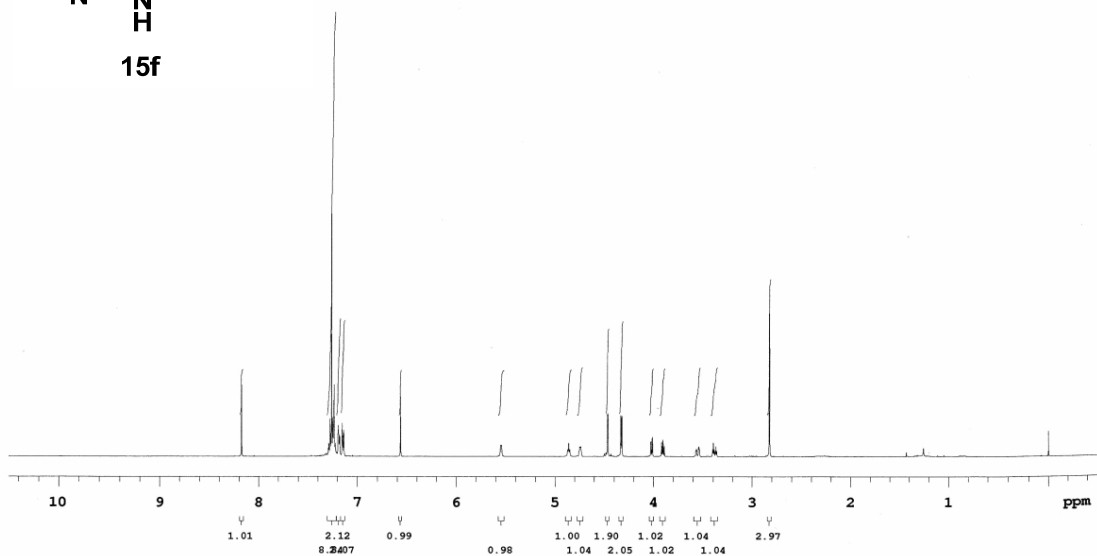

14f

Sample Name:  
 14f  
 Data Collected on:  
 Agilent-NMR-vmrs400  
 Archive directory:  
 /home/vmr1/vmrsys/data/sbparc  
 Sample directory:  
 KM7\_2-43\_P2\_FX\_1H\_Acetone\_20140702\_01  
 FidFile: KJH\_DOS\_NO6\_F109\_Product\_CDCl3\_Carbon\_400M  
  
 Pulse Sequence: CARBON (s2pul)  
 Solvent: cdcl3  
 Data collected on: Jul 8 2014

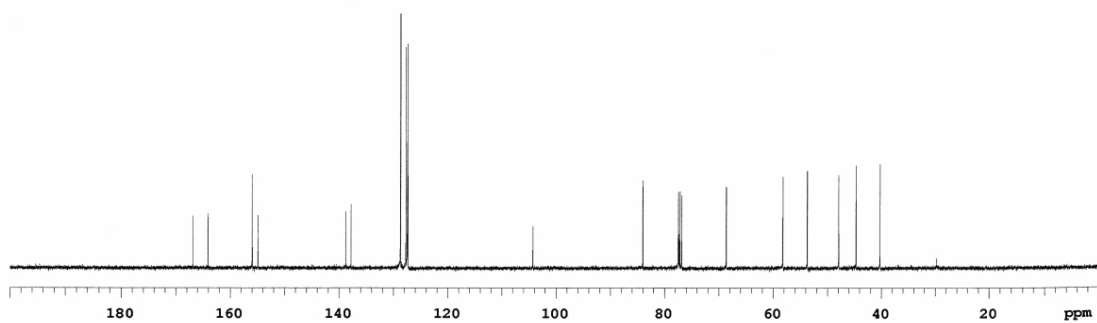

Supplementary Figure 56.  $^1\text{H}$  and  $^{13}\text{C}$  NMR spectra for **15f**.

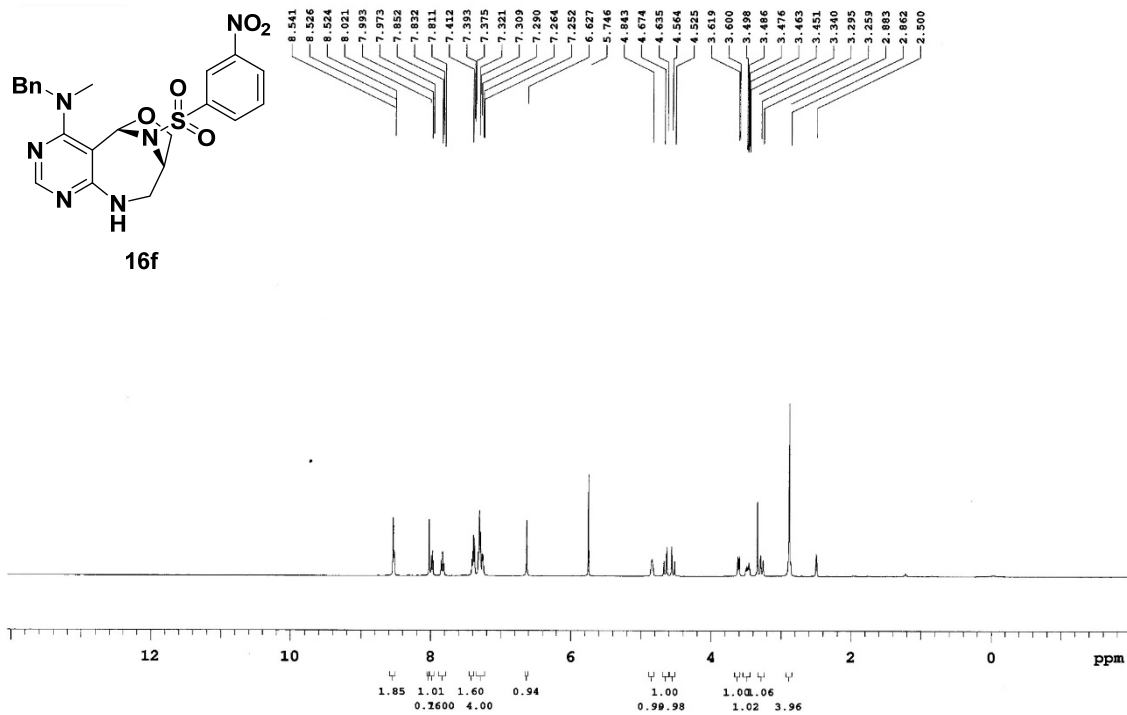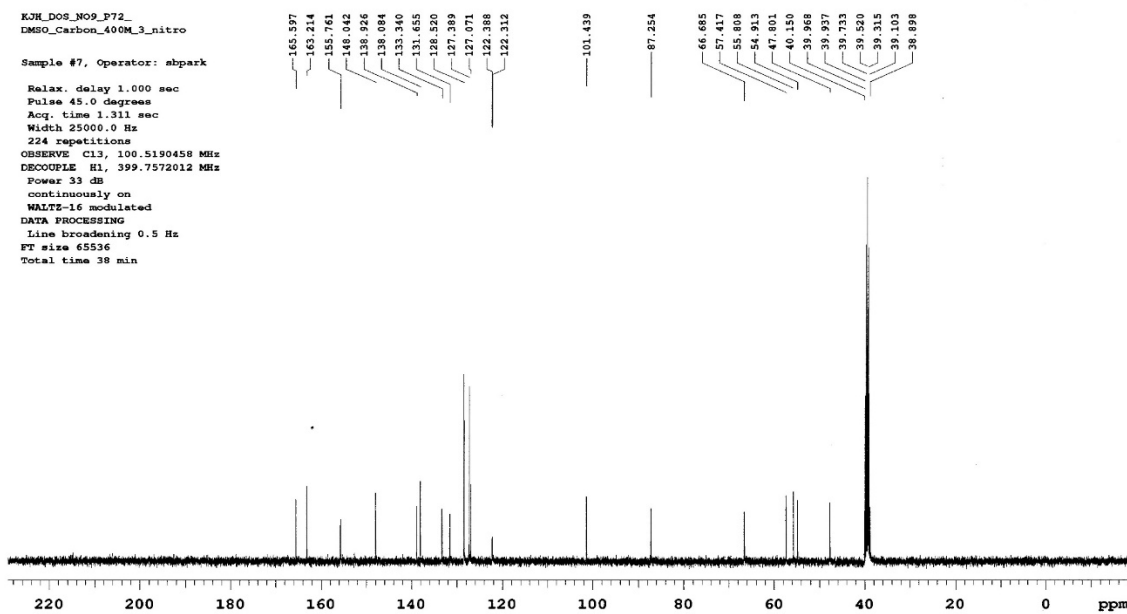

Supplementary Figure 57. <sup>1</sup>H and <sup>13</sup>C NMR spectra for **16f**.

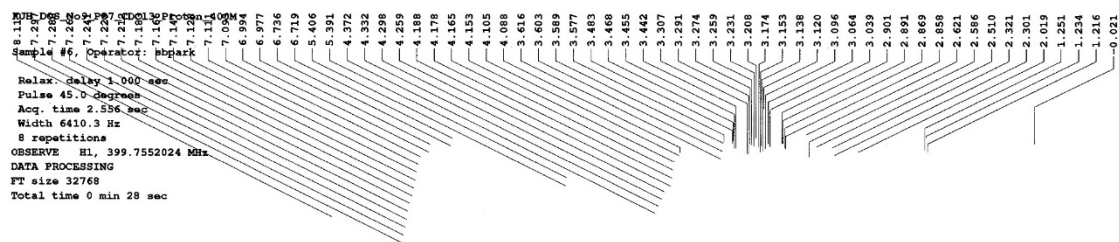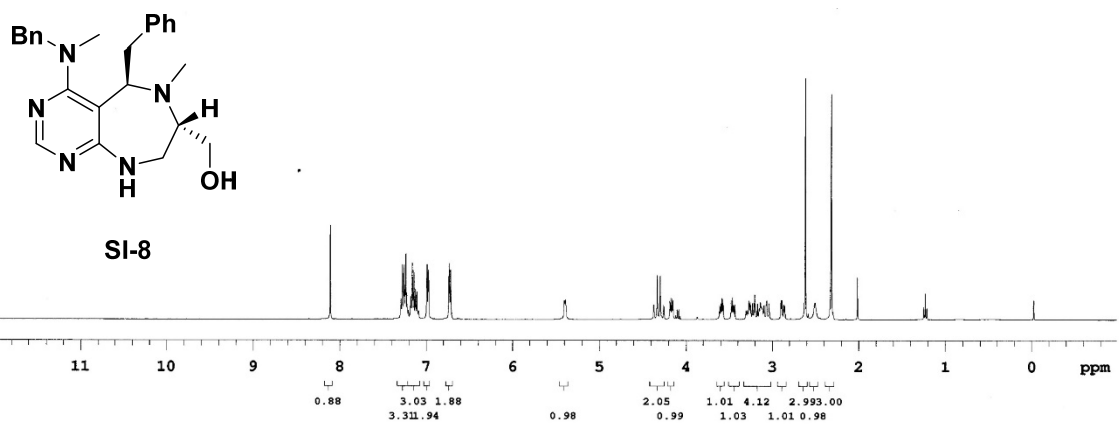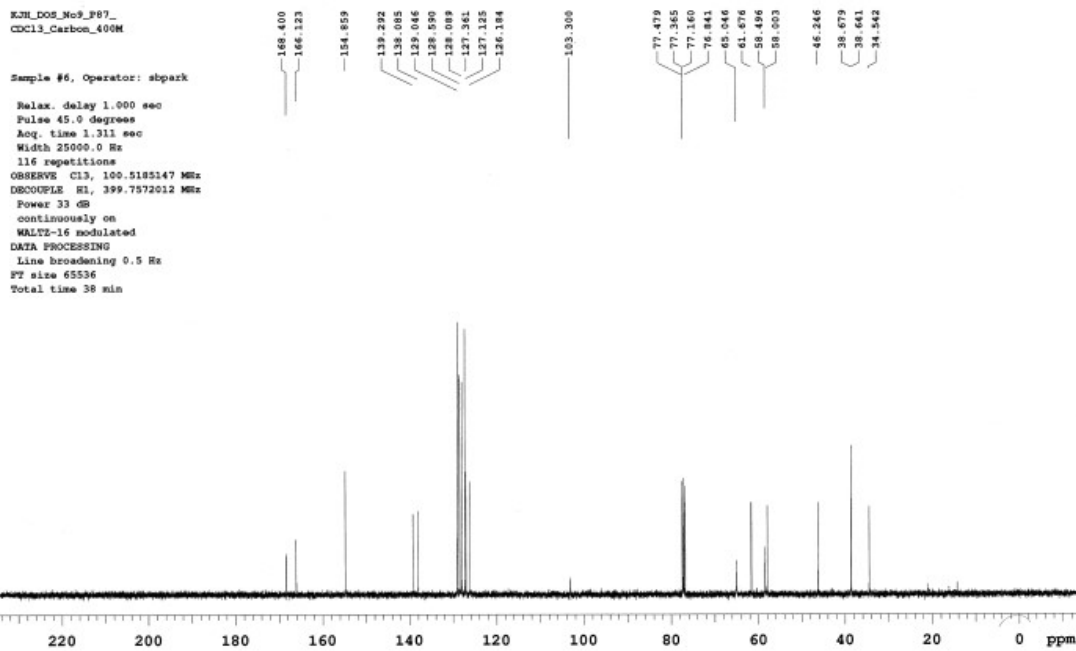

Supplementary Figure 58. <sup>1</sup>H and <sup>13</sup>C NMR spectra for SI-8.

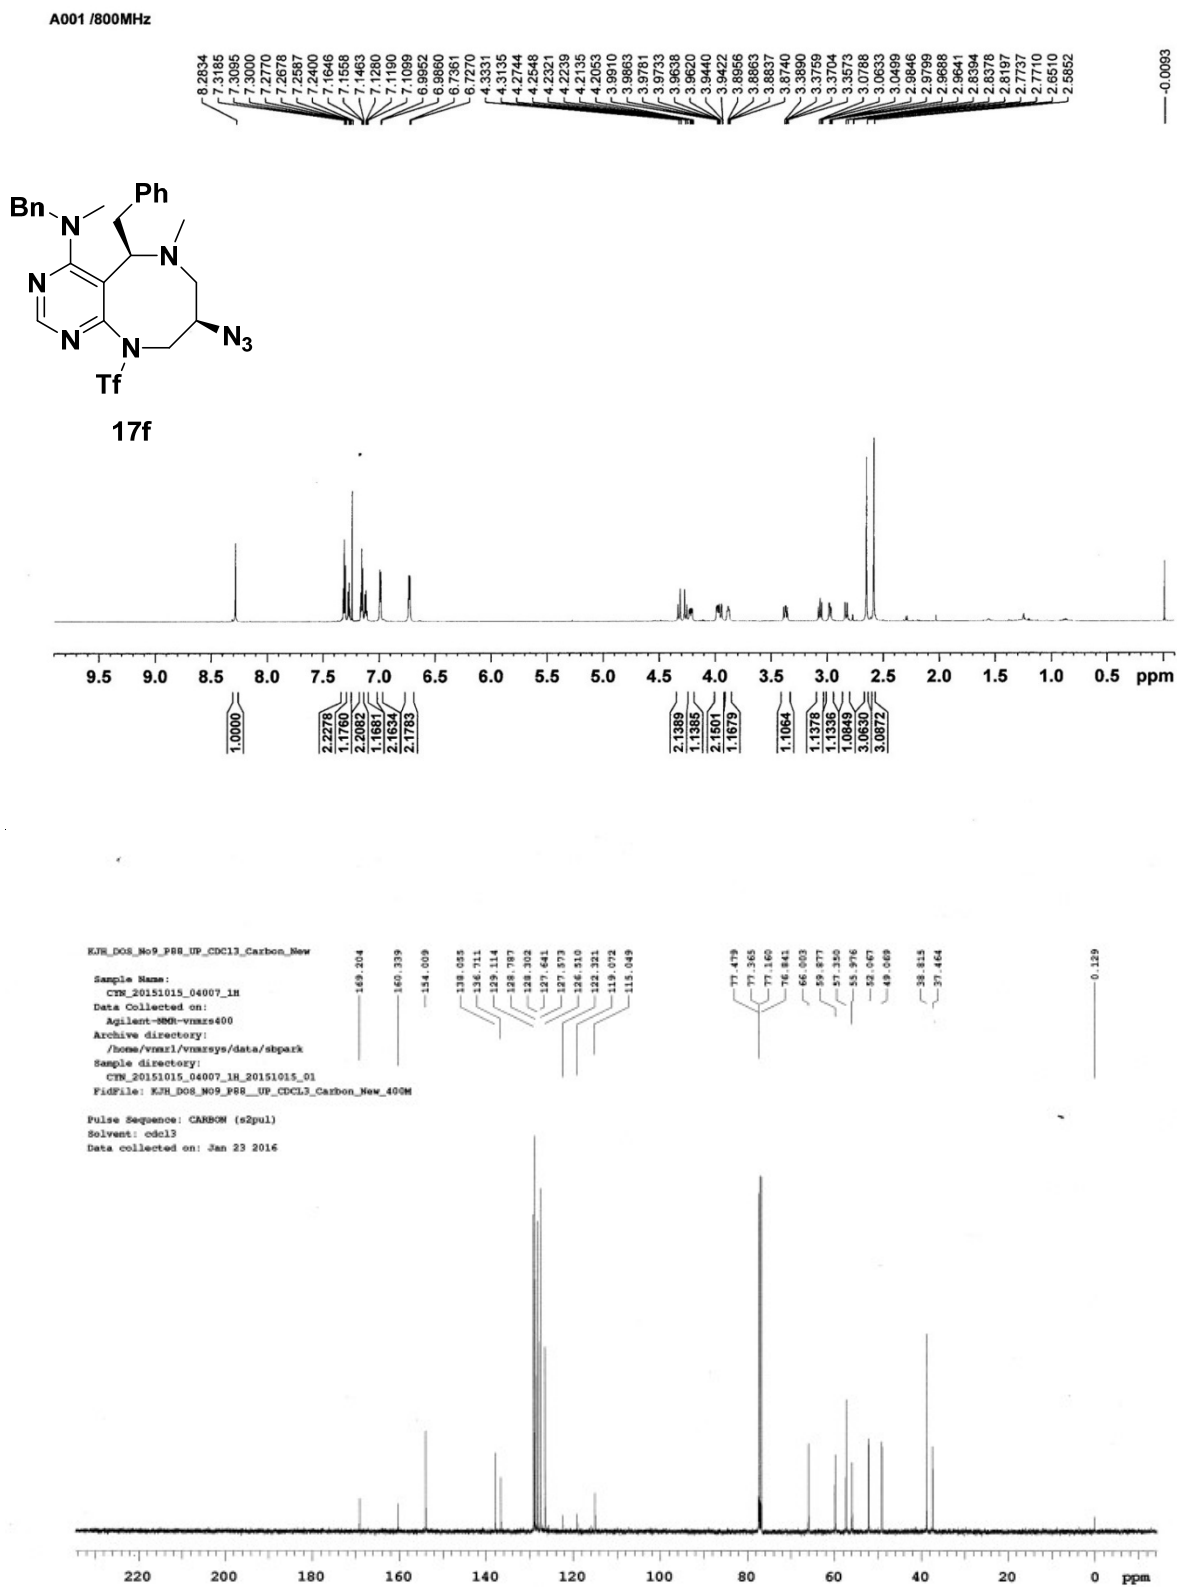

Supplementary Figure 59. <sup>1</sup>H and <sup>13</sup>C NMR spectra for **17f**.

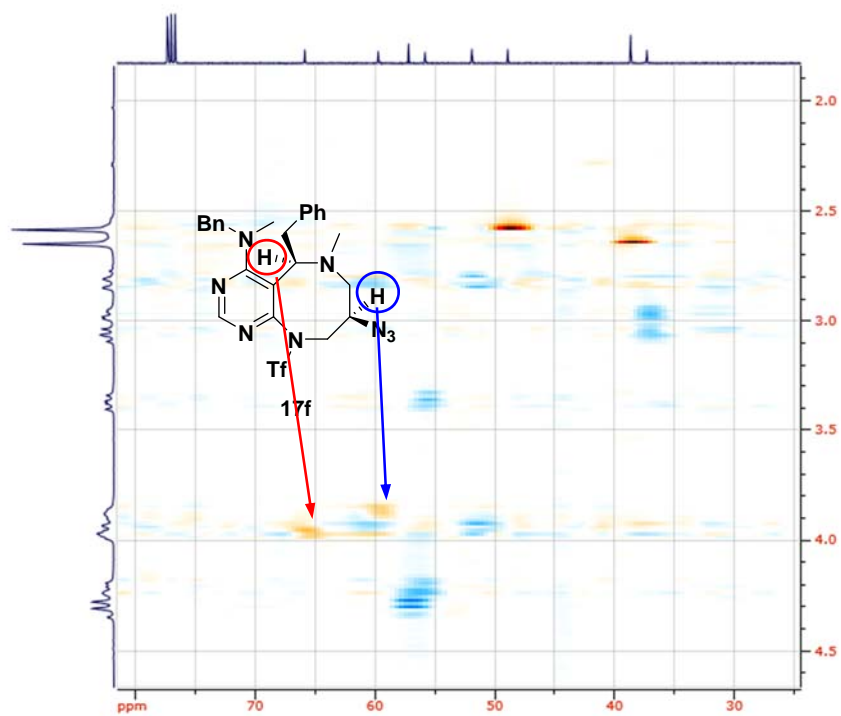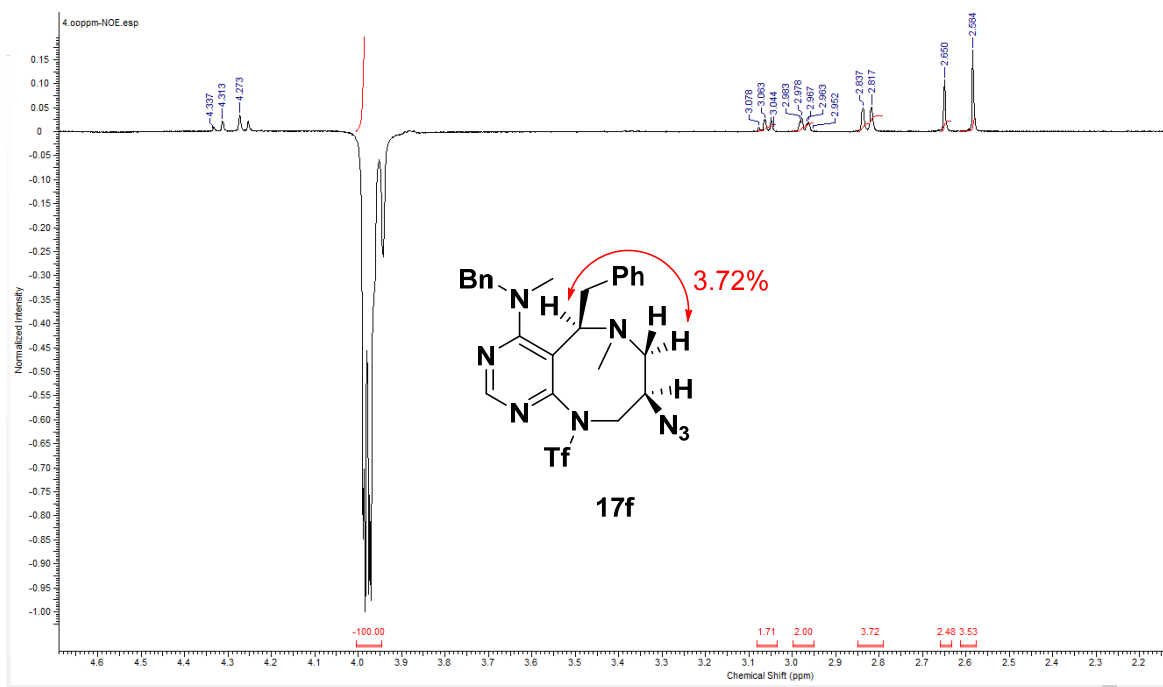

pwii075up\_noe\_3.88  
Selective band center: 3.88 (ppm); width: 32.9 (Hz)

Sample Name:  
Smemb\_noe1  
Date Collected on:  
Agilent-NMR-vnmr400  
Archive directory:  
/home/vmr1/vnmrsys/data/dykchen  
Sample directory:  
S\_C\_Kwon\_No\_2\_p\_94\_product\_20121006\_02  
FidFile: pwii075up\_noe1

Pulse Sequence: NOESY1D  
Solvent: cdcl3  
Data collected on: Feb 3 2016

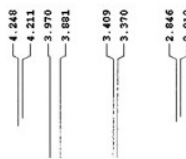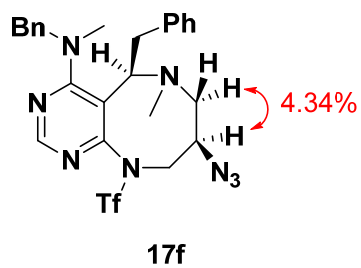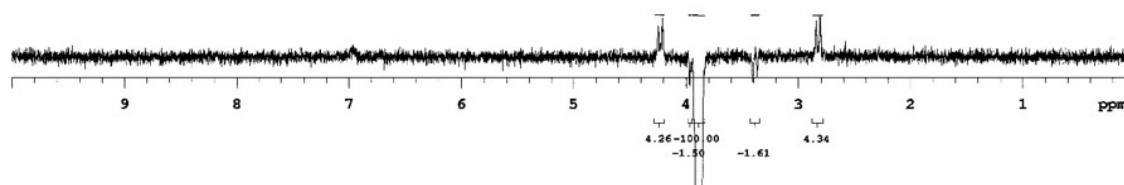

Supplementary Figure 60. HSQC and NOE spectra for 17f.



KJH\_DOS\_No9\_P88\_Down  
 CDCl3\_Proton\_500M

Sample Name:  
 CYN\_20160113\_04081\_1H

Data Collected on:  
 snu500-vnmrs500

Archive directory:  
 Sample directory:

FidFile: KJH\_DOS\_No9\_P88\_down\_CDCl3\_Proton\_500M

Pulse Sequence: PROTON (s2pul)  
 Solvent: cdcl3  
 Data collected on: Jan 14 2016

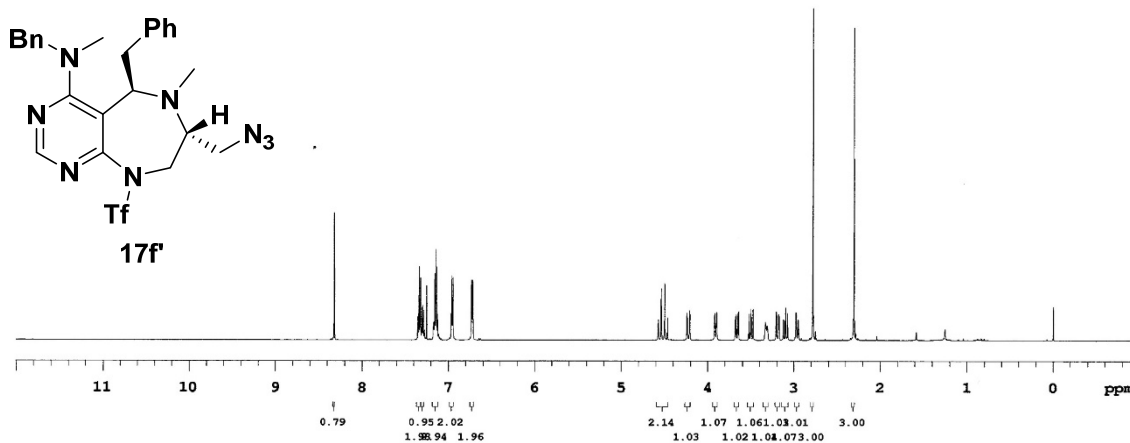

Gradient Shimming

Sample Name:

Data Collected on:  
 Agilent-NMR-vnmrs400

Archive directory:  
 Sample directory:

FidFile: pwii075down\_13C

Pulse Sequence: CARBON (s2pul)  
 Solvent: cd2cl2  
 Data collected on: Jan 22 2016

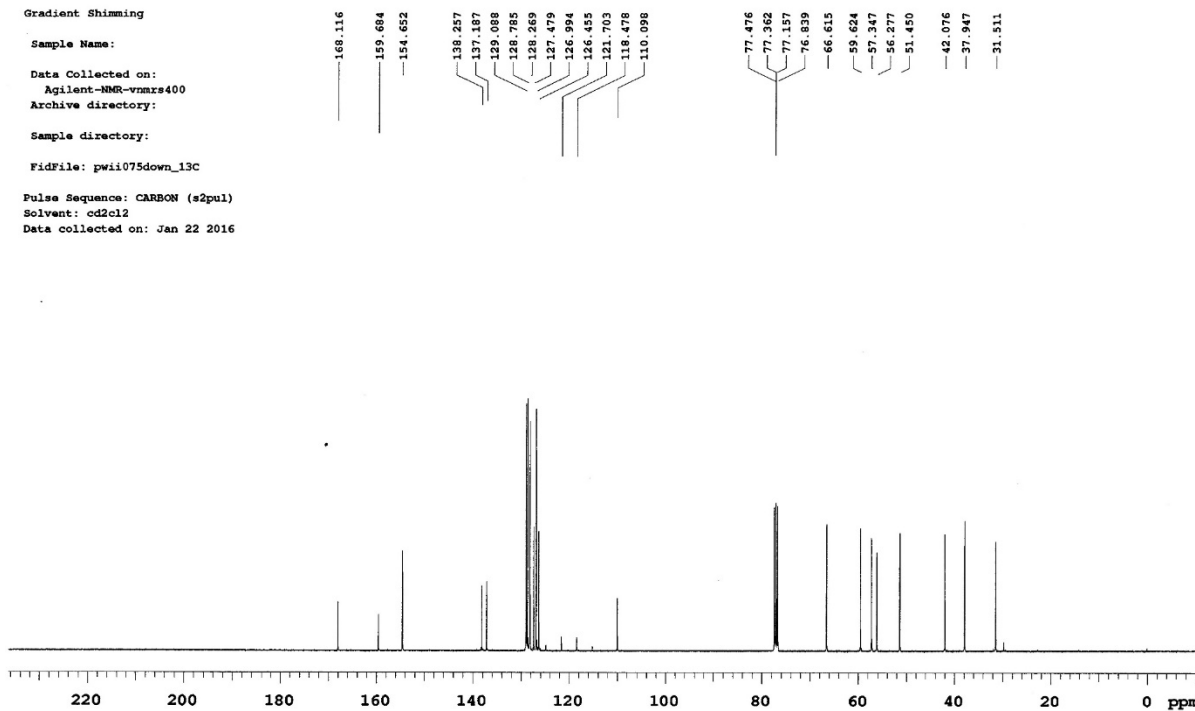

Supplementary Figure 61. <sup>1</sup>H and <sup>13</sup>C NMR spectra for **17f'**.

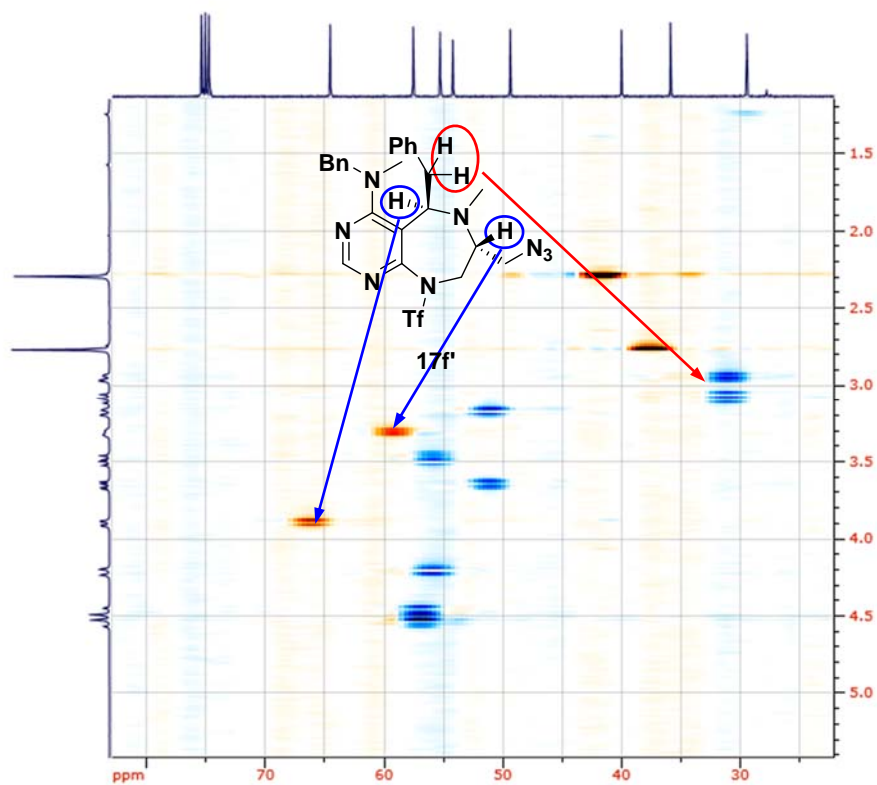

Selective band center: 3.31 (ppm); width: 36.8 (Hz)

Sample Name:  
pwii075down  
Data Collected on:  
Agilent-NMR-vnmr400  
Archive directory:  
/home/vnmr1/vnmrsys/data/ykchung  
Sample directory:  
or\_160122\_2\_20160122\_01  
FidFile: pwii075down\_IDNOE\_2

Pulse Sequence: NOESY1D  
Solvent: cdcl3  
Data collected on: Jan 22 2016

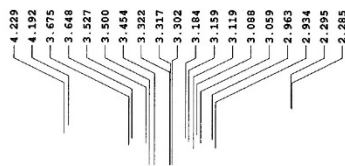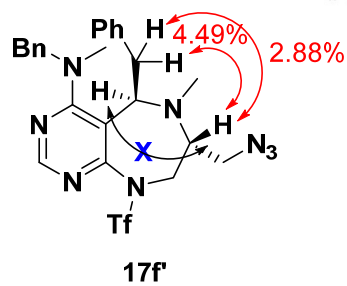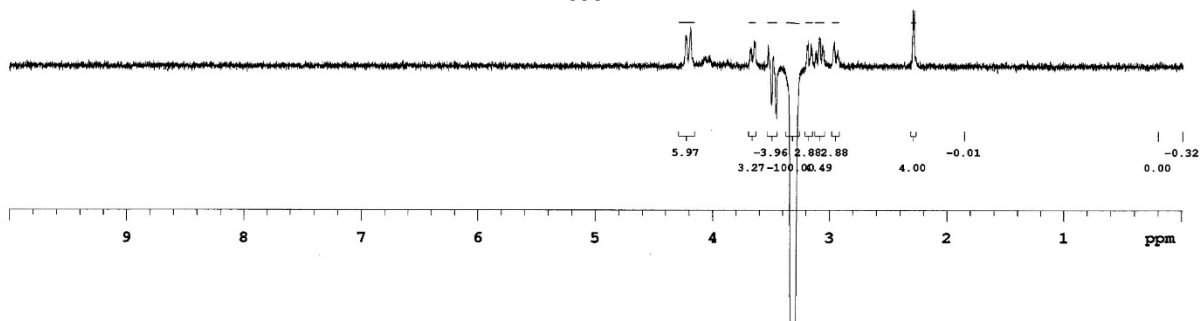

Supplementary Figure 62. HSQC and NOE spectra for 17f'.

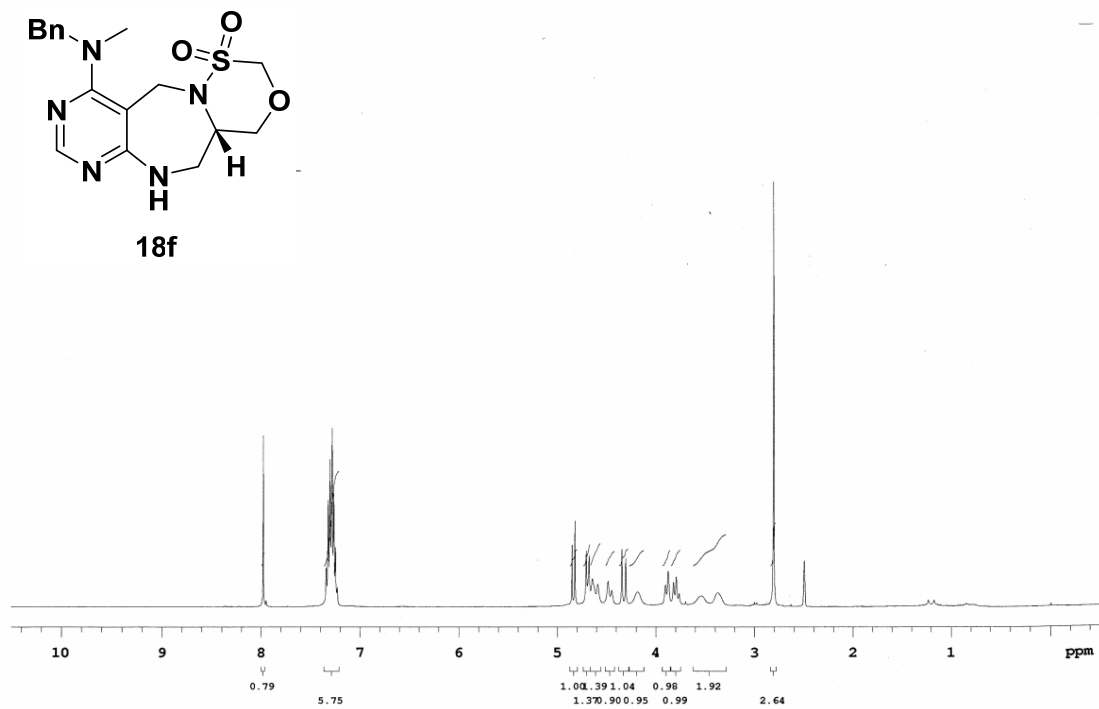

16f

Sample Name:  
KJH\_DOS\_No7\_F107\_DMSO\_400M\_carbon  
Data Collected on:  
Agilent-NMR-vmrs400  
Archive directory:  
/home/vmr1/vmrsys/data/sbark  
Sample directory:  
LY2\_3\_118\_20141223\_20141223\_01  
FidFile: KJH\_DOS\_No7\_F107\_CDCL3\_DMSO\_400M\_Carbon  
Pulse Sequence: CARBON (s2pul)  
Solvent: cdcl3  
Data collected on: Dec 23 2014

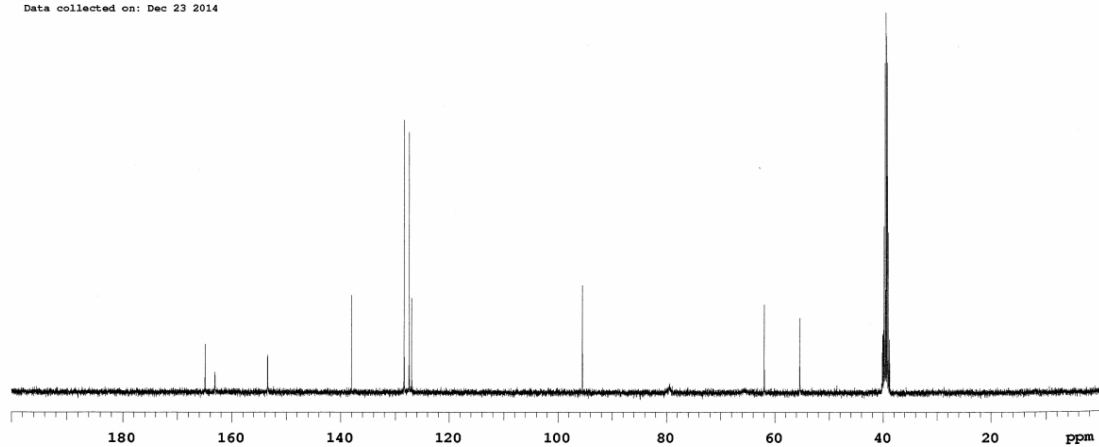

Supplementary Figure 63.  $^1\text{H}$  and  $^{13}\text{C}$  NMR spectra for **18f**.

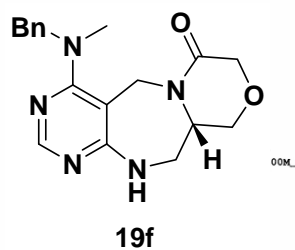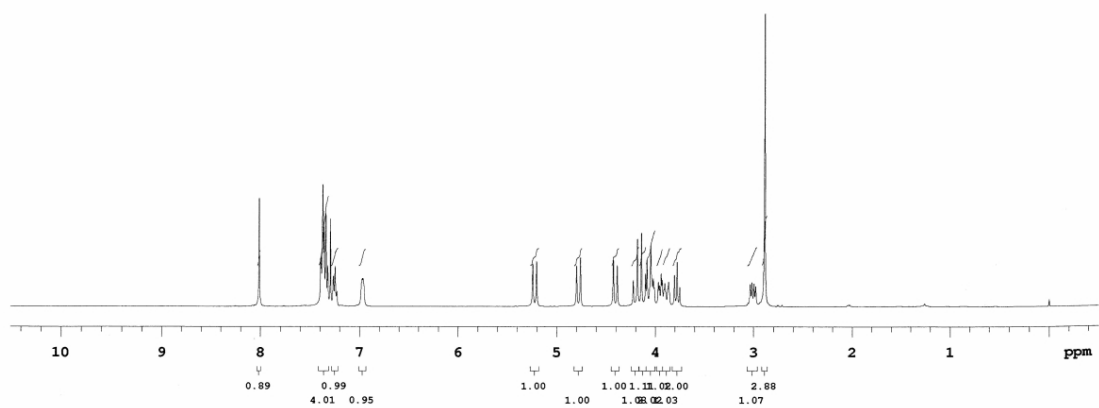

19f

Sample Name:  
 KJH\_DOS\_No8\_P46\_CDCL3\_Carbon\_400M  
 Data Collected on:  
 Agilent-NMR-vnmrs400  
 Archive directory:  
 /home/vnmr1/vnmrsys/data/chulbon  
 Sample directory:  
 13017\_b\_20150427\_01  
 FidFile: KJH\_DOS\_No8\_P46\_CDCL3\_carbon\_400M\_

Pulse Sequence: CARBON (s2pul)  
 Solvent: dmsc  
 Data collected on: Apr 28 2015

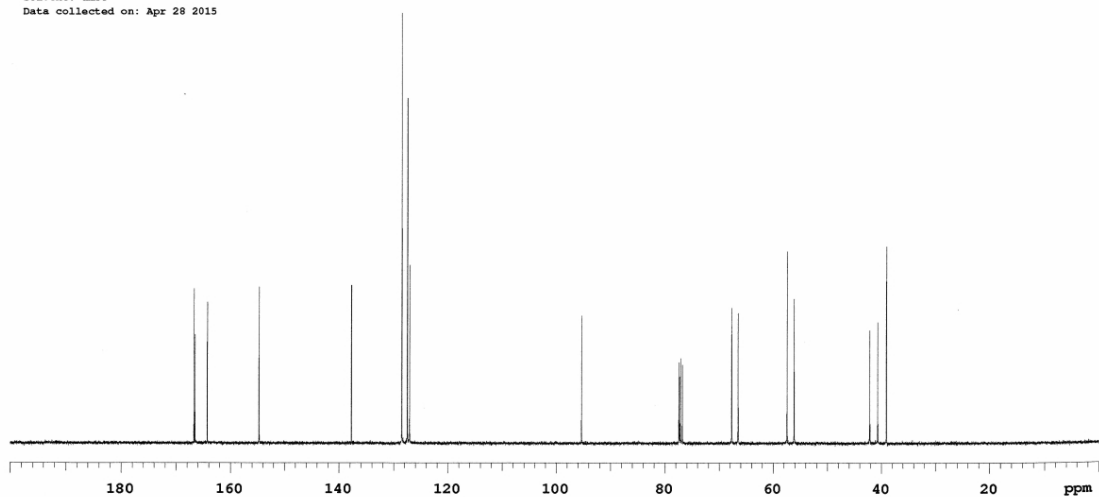

**Supplementary Figure 64.**  $^1\text{H}$  and  $^{13}\text{C}$  NMR spectra for **19f**.

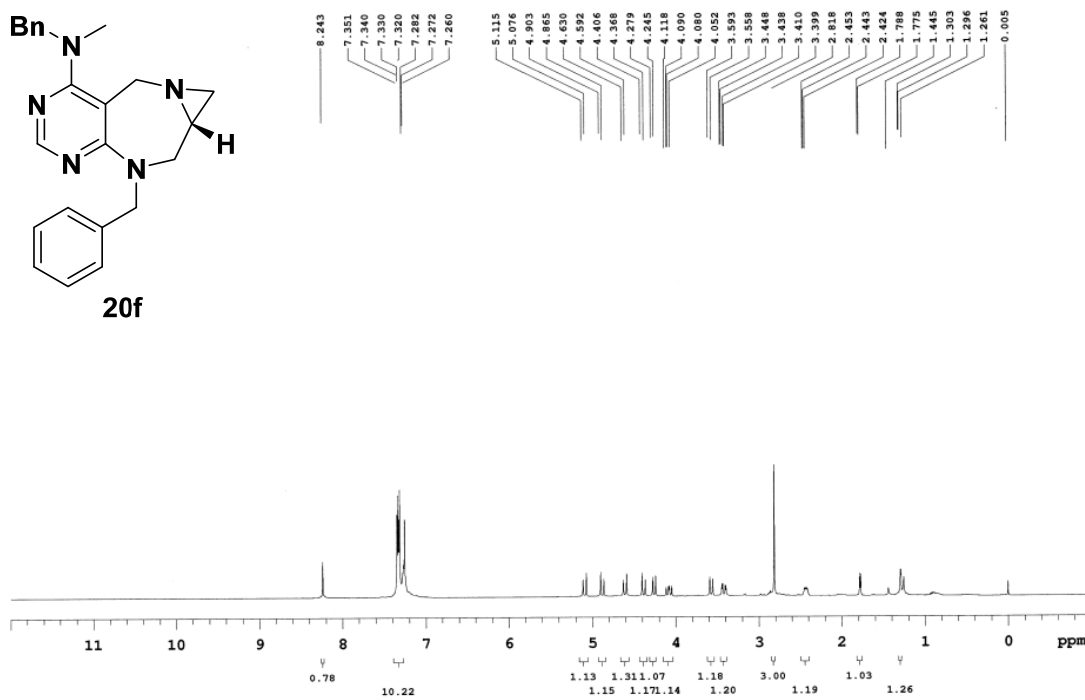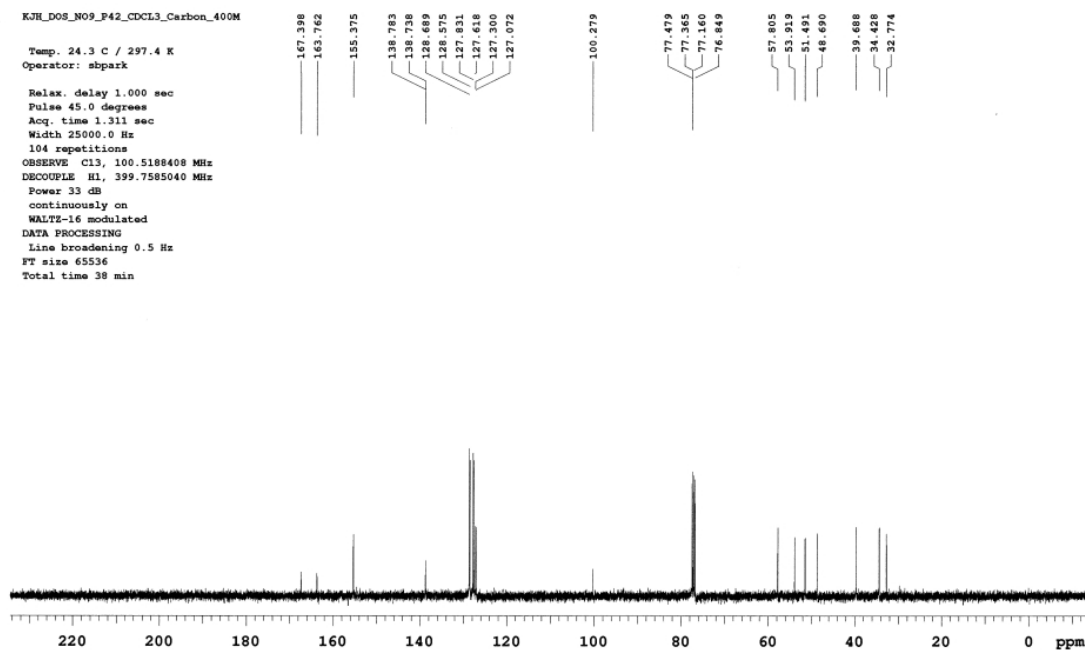

Supplementary Figure 65. <sup>1</sup>H and <sup>13</sup>C NMR spectra for **20f**.

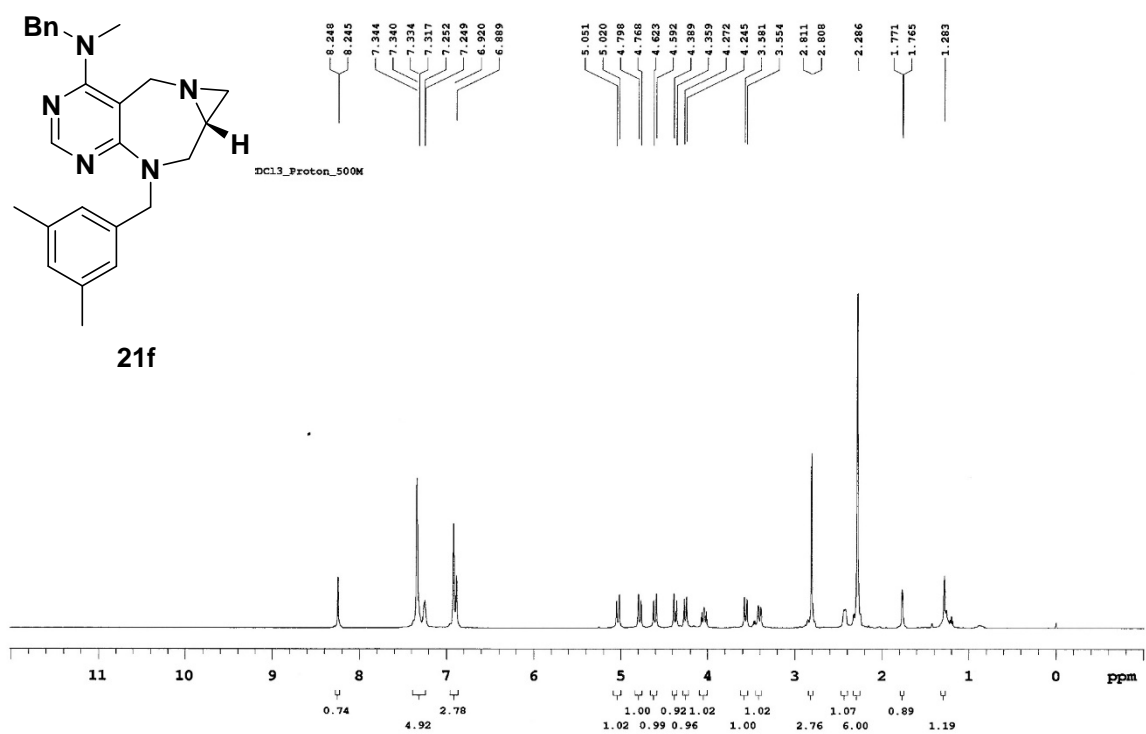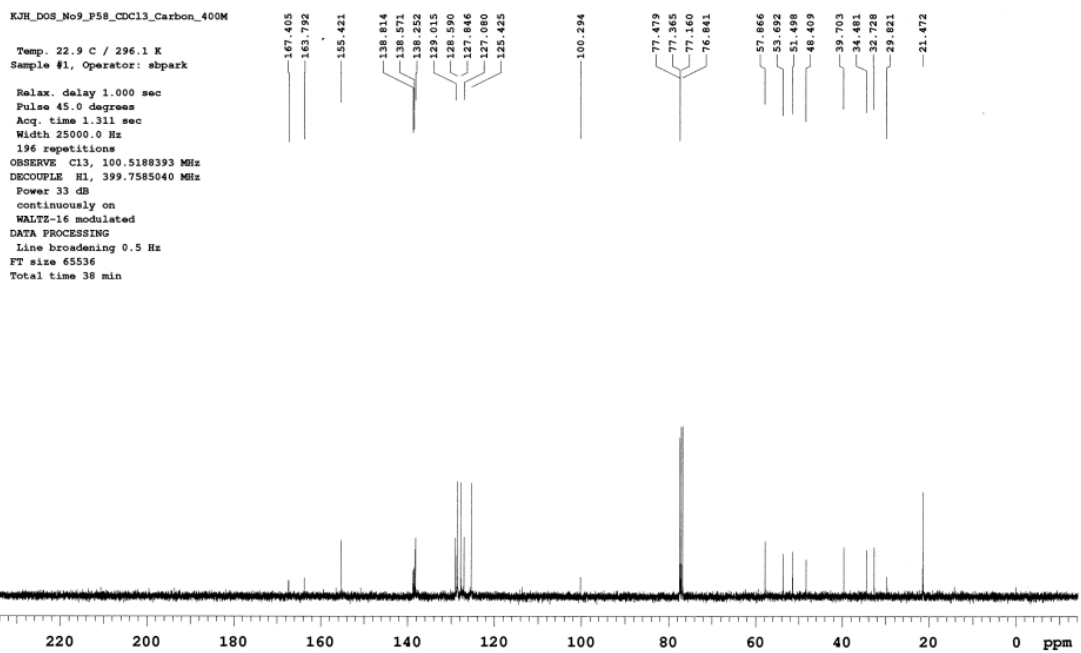

Supplementary Figure 66. <sup>1</sup>H and <sup>13</sup>C NMR spectra for **21f**.

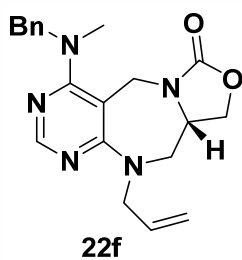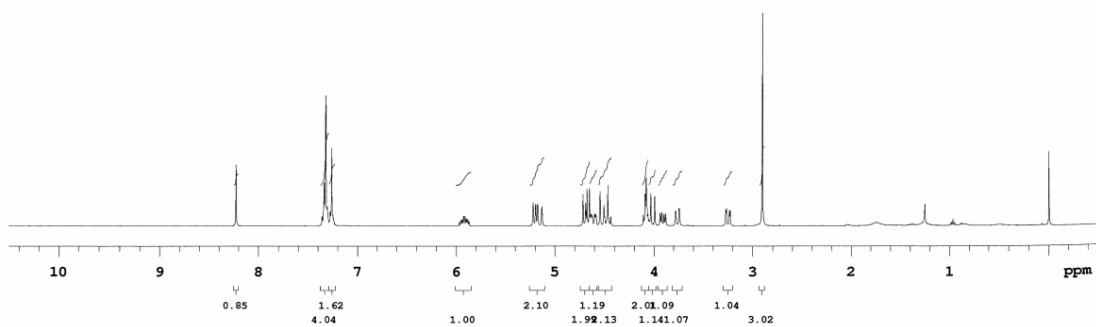

Sample Name: 19f  
 Data Collected on: Agilent-NMR-vnmrs400  
 Archive directory: /home/vnmr1/vnmrsys/data/sbpark  
 Sample directory: JAR-V-9\_re\_13c\_20140402\_20150402\_01  
 FidFile: CARBON\_01

Pulse Sequence: CARBON (s2pul)  
 Solvent: cdcl3  
 Data collected on: Apr 2 2015

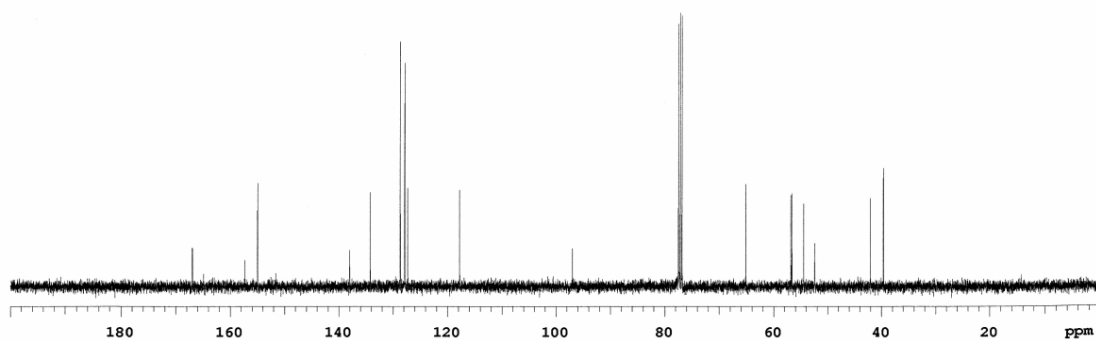

Supplementary Figure 67.  $^1\text{H}$  and  $^{13}\text{C}$  NMR spectra for **22f**.

This report was created by ACD/NMR Processor Academic Edition. For more information go to [www.acdlabs.com/nmrproc/](http://www.acdlabs.com/nmrproc/)  
KJH\_PROTON-No8\_P23\_DMSO\_NICEM400M.jdf

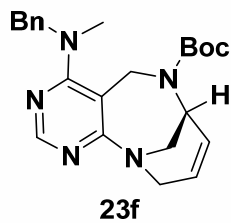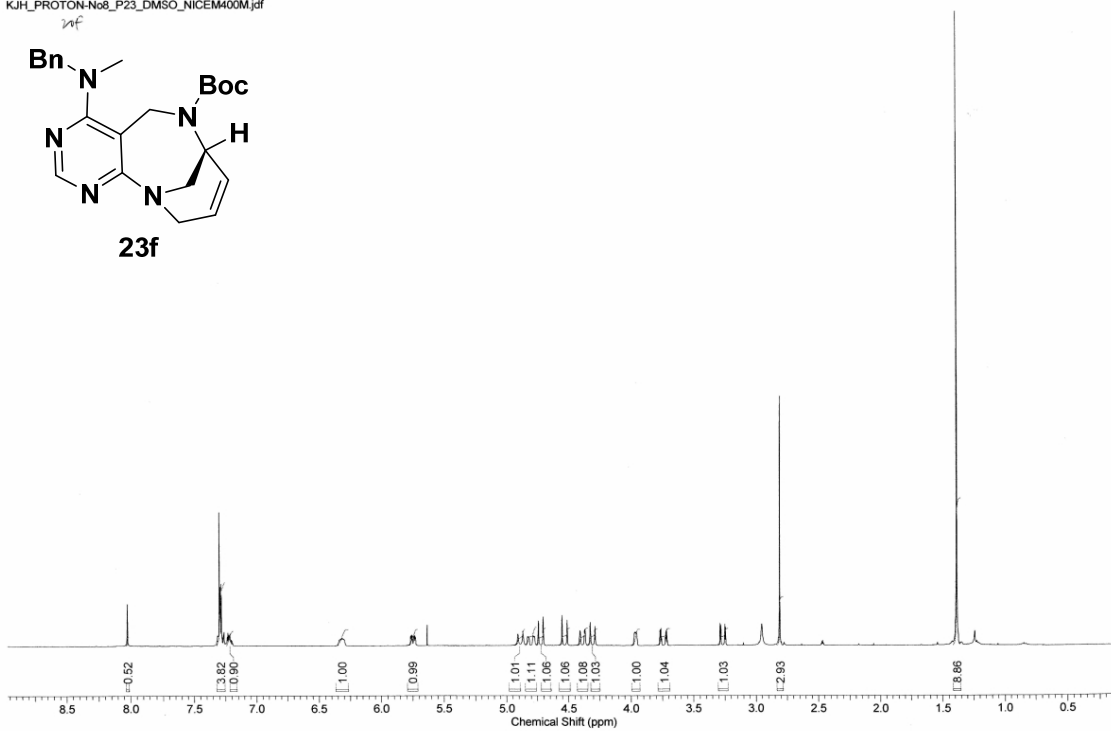

This report was created by ACD/NMR Processor Academic Edition. For more information go to [www.acdlabs.com/nmrproc/](http://www.acdlabs.com/nmrproc/)  
KJH\_CARBON-No8\_P23\_DMSO\_NICEM\_400M.jdf

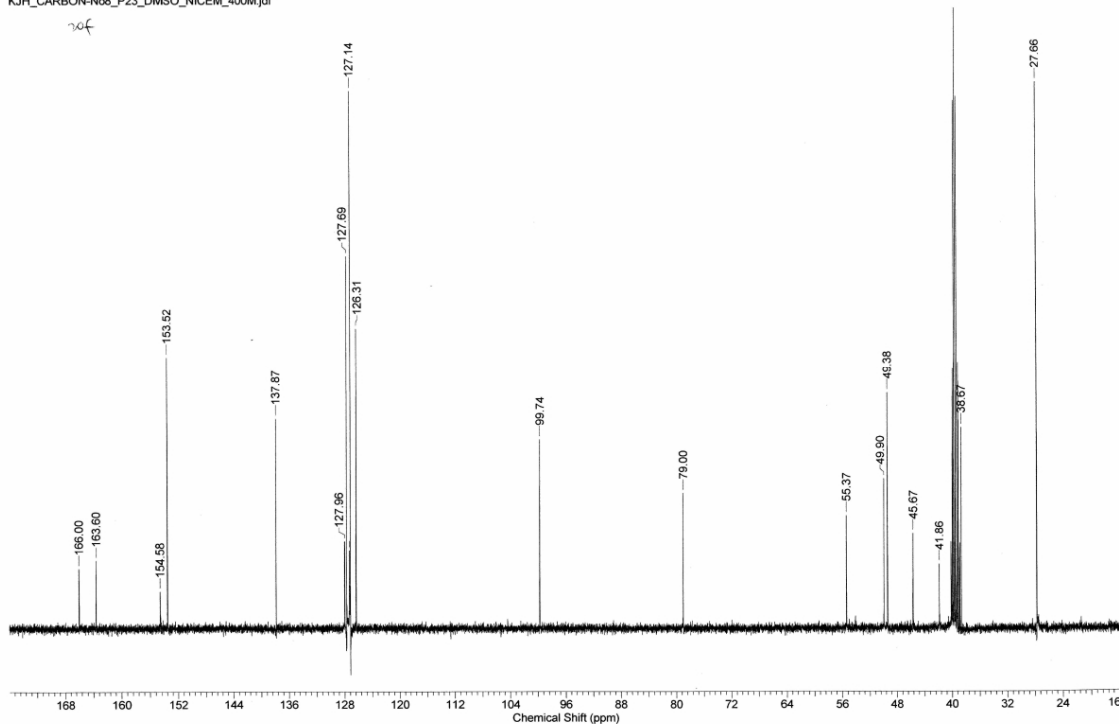

Supplementary Figure 68.  $^1\text{H}$  and  $^{13}\text{C}$  NMR spectra for **23f**.



**Supplementary Table 1.** Crystal data and structure refinement for **16f**

|                                            |                                                                              |                |
|--------------------------------------------|------------------------------------------------------------------------------|----------------|
| <b>Chemical formula</b>                    | C <sub>23</sub> H <sub>26</sub> N <sub>6</sub> O <sub>6</sub> S              |                |
| <b>Formula weight</b>                      | 514.56                                                                       |                |
| <b>Temperature</b>                         | 296(2) K                                                                     |                |
| <b>Wavelength</b>                          | 0.71073 Å                                                                    |                |
| <b>Crystal size</b>                        | 0.200 x 0.400 x 0.400 mm                                                     |                |
| <b>Crystal habit</b>                       | colorless block                                                              |                |
| <b>Crystal system</b>                      | monoclinic                                                                   |                |
| <b>Space group</b>                         | P 1 2 <sub>1</sub> 1                                                         |                |
| <b>Unit cell dimensions</b>                | a = 10.0193(5) Å                                                             |                |
|                                            | b = 11.4723(6) Å                                                             | α = 90°        |
|                                            | c = 10.4263(5) Å                                                             | β = 92.079(3)° |
| <b>Volume</b>                              | 1197.66(10) Å <sup>3</sup>                                                   | γ = 90°        |
| <b>Z</b>                                   | 2                                                                            |                |
| <b>Density (calculated)</b>                | 1.427 g/cm <sup>3</sup>                                                      |                |
| <b>Absorption coefficient</b>              | 0.188 mm <sup>-1</sup>                                                       |                |
| <b>F(000)</b>                              | 540                                                                          |                |
| <b>Theta range for data collection</b>     | 1.96 to 28.28°                                                               |                |
| <b>Index ranges</b>                        | -13 ≤ h ≤ 13, -15 ≤ k ≤ 15, -13 ≤ l ≤ 13                                     |                |
| <b>Reflections collected</b>               | 20689                                                                        |                |
| <b>Independent reflections</b>             | 5558 [R(int) = 0.1027]                                                       |                |
| <b>Coverage of independent reflections</b> | 98.4%                                                                        |                |
| <b>Absorption correction</b>               | multi-scan                                                                   |                |
| <b>Max. and min. transmission</b>          | 0.9630 and 0.9290                                                            |                |
| <b>Refinement method</b>                   | Full-matrix least-squares on F <sup>2</sup>                                  |                |
| <b>Refinement program</b>                  | SHELXL-2013 (Sheldrick, 2013)                                                |                |
| <b>Function minimized</b>                  | Σ w(F <sub>o</sub> <sup>2</sup> - F <sub>c</sub> <sup>2</sup> ) <sup>2</sup> |                |

|                                         |                                                                                                                                                                       |
|-----------------------------------------|-----------------------------------------------------------------------------------------------------------------------------------------------------------------------|
| <b>Data / restraints / parameters</b>   | 5558 / 7 / 316                                                                                                                                                        |
| <b>Goodness-of-fit on F<sup>2</sup></b> | 1.070                                                                                                                                                                 |
| <b>Final R indices</b>                  | 2086 data; I > 2σ(I)<br>R1 = 0.1380, wR2 = 0.2464                                                                                                                     |
|                                         | all data<br>R1 = 0.3170, wR2 = 0.3164                                                                                                                                 |
| <b>Weighting scheme</b>                 | w = 1/[σ <sup>2</sup> (F <sub>o</sub> <sup>2</sup> ) + (0.1037P) <sup>2</sup> + 2.0087P]<br>where P = (F <sub>o</sub> <sup>2</sup> + 2F <sub>c</sub> <sup>2</sup> )/3 |
| <b>Absolute structure parameter</b>     | 0.1(1)                                                                                                                                                                |
| <b>Largest diff. peak and hole</b>      | 0.563 and -0.341 eÅ <sup>-3</sup>                                                                                                                                     |
| <b>R.M.S. deviation from mean</b>       | 0.085 eÅ <sup>-3</sup>                                                                                                                                                |

**Supplementary Table 2.** Atomic coordinates and equivalent isotropic atomic displacement parameters ( $\text{\AA}^2$ ) for **16f**.  $U(\text{eq})$  is defined as one third of the trace of the orthogonalized  $U_{ij}$  tensor.

|     | <b>x/a</b> | <b>y/b</b> | <b>z/c</b> | <b>U(eq)</b> |
|-----|------------|------------|------------|--------------|
| C1  | 0.0654(11) | 0.2662(8)  | 0.2825(11) | 0.073(5)     |
| C2  | 0.0756(9)  | 0.2179(9)  | 0.1610(11) | 0.064(4)     |
| C3  | 0.9707(10) | 0.1529(9)  | 0.1075(7)  | 0.061(4)     |
| C4  | 0.8555(9)  | 0.1360(9)  | 0.1755(8)  | 0.063(4)     |
| C5  | 0.8452(10) | 0.1843(10) | 0.2971(8)  | 0.083(6)     |
| C6  | 0.9502(12) | 0.2494(10) | 0.3506(8)  | 0.087(6)     |
| C7  | 0.9039(13) | 0.3097(11) | 0.8665(12) | 0.048(3)     |
| C8  | 0.7896(15) | 0.3606(14) | 0.9460(14) | 0.064(4)     |
| C9  | 0.7383(13) | 0.1742(13) | 0.8667(14) | 0.062(4)     |
| C10 | 0.9085(16) | 0.3633(13) | 0.7335(15) | 0.067(4)     |
| C11 | 0.6910(13) | 0.2706(12) | 0.6512(12) | 0.045(3)     |
| C12 | 0.6595(13) | 0.1888(14) | 0.7453(12) | 0.053(4)     |
| C13 | 0.5495(16) | 0.1137(14) | 0.7190(14) | 0.065(4)     |
| C14 | 0.510(2)   | 0.1962(16) | 0.5265(16) | 0.081(6)     |
| C15 | 0.4248(16) | 0.9415(14) | 0.7672(15) | 0.076(5)     |
| C16 | 0.4715(13) | 0.0786(11) | 0.9379(13) | 0.051(3)     |
| C17 | 0.5295(13) | 0.0088(13) | 0.0482(14) | 0.051(4)     |
| C18 | 0.6162(14) | 0.9193(11) | 0.0347(13) | 0.052(4)     |
| C19 | 0.6710(15) | 0.8579(15) | 0.1429(15) | 0.069(4)     |
| C20 | 0.6369(19) | 0.8892(17) | 0.2628(15) | 0.081(6)     |
| C21 | 0.5471(17) | 0.9817(18) | 0.2765(18) | 0.080(5)     |
| C22 | 0.4972(17) | 0.0382(16) | 0.1683(18) | 0.077(5)     |

|     |            |            |            |            |
|-----|------------|------------|------------|------------|
| N1  | 0.1780(19) | 0.3272(16) | 0.3397(16) | 0.099(6)   |
| N2  | 0.8809(11) | 0.1862(9)  | 0.8580(10) | 0.052(3)   |
| N3  | 0.6145(14) | 0.2749(11) | 0.5388(11) | 0.067(4)   |
| N4  | 0.4777(12) | 0.1196(11) | 0.6096(13) | 0.065(3)   |
| N5  | 0.7864(13) | 0.3494(11) | 0.6539(13) | 0.073(4)   |
| N6  | 0.5032(10) | 0.0339(10) | 0.8133(11) | 0.052(3)   |
| O1  | 0.1590(19) | 0.3801(18) | 0.4392(17) | 0.161(7)   |
| O2  | 0.2791(15) | 0.3318(15) | 0.2851(12) | 0.121(6)   |
| O3  | 0.9228(11) | 0.9869(8)  | 0.9465(9)  | 0.068(3)   |
| O4  | 0.1082(9)  | 0.1229(9)  | 0.9126(8)  | 0.062(3)   |
| O5  | 0.7025(8)  | 0.2633(8)  | 0.9584(8)  | 0.059(3)   |
| S1  | 0.9786(4)  | 0.1030(3)  | 0.9515(3)  | 0.0570(10) |
| O1S | 0.2246(13) | 0.0545(10) | 0.5055(11) | 0.087(3)   |
| C1S | 0.1250(19) | 0.0840(18) | 0.5891(17) | 0.104(7)   |

---

**Supplementary Table 3.** Bond lengths (Å) and Bond angles (°) for **16f**.

|          |           |          |           |
|----------|-----------|----------|-----------|
| C1-C2    | 1.39      | C1-C6    | 1.39      |
| C1-N1    | 1.439(15) | C2-C3    | 1.39      |
| C2-H2    | 0.93      | C3-C4    | 1.39      |
| C3-S1    | 1.728(8)  | C4-C5    | 1.39      |
| C4-H4    | 0.93      | C5-C6    | 1.39      |
| C5-H5    | 0.93      | C6-H6    | 0.93      |
| C7-N2    | 1.438(15) | C7-C10   | 1.520(19) |
| C7-C8    | 1.552(18) | C7-H7    | 0.98      |
| C8-O5    | 1.426(16) | C8-H8A   | 0.97      |
| C8-H8B   | 0.97      | C9-N2    | 1.442(16) |
| C9-O5    | 1.453(15) | C9-C12   | 1.477(19) |
| C9-H9    | 0.98      | C10-N5   | 1.462(18) |
| C10-H10A | 0.97      | C10-H10B | 0.97      |
| C11-N5   | 1.315(17) | C11-N3   | 1.378(16) |
| C11-C12  | 1.402(19) | C12-C13  | 1.42(2)   |
| C13-N4   | 1.328(17) | C13-N6   | 1.433(18) |
| C14-N4   | 1.28(2)   | C14-N3   | 1.39(2)   |
| C14-H14  | 0.93      | C15-N6   | 1.395(17) |
| C15-H15A | 0.96      | C15-H15B | 0.96      |
| C15-H15C | 0.96      | C16-N6   | 1.443(16) |
| C16-C17  | 1.501(17) | C16-H16A | 0.97      |
| C16-H16B | 0.97      | C17-C22  | 1.35(2)   |
| C17-C18  | 1.355(17) | C18-C19  | 1.423(19) |
| C18-H18  | 0.93      | C19-C20  | 1.36(2)   |
| C19-H19  | 0.93      | C20-C21  | 1.40(2)   |
| C20-H20  | 0.93      | C21-C22  | 1.38(2)   |

|             |           |               |           |
|-------------|-----------|---------------|-----------|
| C21-H21     | 0.93      | C22-H22       | 0.93      |
| N1-O2       | 1.181(18) | N1-O1         | 1.22(2)   |
| N2-S1       | 1.658(12) | N5-H5A        | 0.86      |
| O3-S1       | 1.445(10) | O4-S1         | 1.393(9)  |
| O1S-C1S     | 1.391(19) | O1S-H1S       | 0.82      |
| C1S-H1S1    | 0.96      | C1S-H1S2      | 0.96      |
| C1S-H1S3    | 0.96      |               |           |
| C2-C1-C6    | 120.0     | C2-C1-N1      | 119.2(12) |
| C6-C1-N1    | 120.6(11) | C3-C2-C1      | 120.0     |
| C3-C2-H2    | 120.0     | C1-C2-H2      | 120.0     |
| C2-C3-C4    | 120.0     | C2-C3-S1      | 119.7(6)  |
| C4-C3-S1    | 120.1(6)  | C5-C4-C3      | 120.0     |
| C5-C4-H4    | 120.0     | C3-C4-H4      | 120.0     |
| C6-C5-C4    | 120.0     | C6-C5-H5      | 120.0     |
| C4-C5-H5    | 120.0     | C5-C6-C1      | 120.0     |
| C5-C6-H6    | 120.0     | C1-C6-H6      | 120.0     |
| N2-C7-C10   | 110.6(11) | N2-C7-C8      | 106.5(11) |
| C10-C7-C8   | 112.5(12) | N2-C7-H7      | 109.0     |
| C10-C7-H7   | 109.0     | C8-C7-H7      | 109.0     |
| O5-C8-C7    | 102.7(11) | O5-C8-H8A     | 111.2     |
| C7-C8-H8A   | 111.2     | O5-C8-H8B     | 111.2     |
| C7-C8-H8B   | 111.2     | H8A-C8-H8B    | 109.1     |
| N2-C9-O5    | 104.1(10) | N2-C9-C12     | 115.8(12) |
| O5-C9-C12   | 110.3(12) | N2-C9-H9      | 108.8     |
| O5-C9-H9    | 108.8     | C12-C9-H9     | 108.8     |
| N5-C10-C7   | 114.9(12) | N5-C10-H10A   | 108.5     |
| C7-C10-H10A | 108.5     | N5-C10-H10B   | 108.5     |
| C7-C10-H10B | 108.5     | H10A-C10-H10B | 107.5     |

|               |           |               |           |
|---------------|-----------|---------------|-----------|
| N5-C11-N3     | 112.0(12) | N5-C11-C12    | 128.9(13) |
| N3-C11-C12    | 119.1(13) | C11-C12-C13   | 117.7(12) |
| C11-C12-C9    | 123.3(13) | C13-C12-C9    | 119.0(14) |
| N4-C13-C12    | 121.9(14) | N4-C13-N6     | 116.3(14) |
| C12-C13-N6    | 121.6(12) | N4-C14-N3     | 126.2(17) |
| N4-C14-H14    | 116.9     | N3-C14-H14    | 116.9     |
| N6-C15-H15A   | 109.5     | N6-C15-H15B   | 109.5     |
| H15A-C15-H15B | 109.5     | N6-C15-H15C   | 109.5     |
| H15A-C15-H15C | 109.5     | H15B-C15-H15C | 109.5     |
| N6-C16-C17    | 114.1(11) | N6-C16-H16A   | 108.7     |
| C17-C16-H16A  | 108.7     | N6-C16-H16B   | 108.7     |
| C17-C16-H16B  | 108.7     | H16A-C16-H16B | 107.6     |
| C22-C17-C18   | 117.6(15) | C22-C17-C16   | 118.6(14) |
| C18-C17-C16   | 123.8(12) | C17-C18-C19   | 121.5(13) |
| C17-C18-H18   | 119.2     | C19-C18-H18   | 119.2     |
| C20-C19-C18   | 119.8(16) | C20-C19-H19   | 120.1     |
| C18-C19-H19   | 120.1     | C19-C20-C21   | 118.6(15) |
| C19-C20-H20   | 120.7     | C21-C20-H20   | 120.7     |
| C22-C21-C20   | 119.2(16) | C22-C21-H21   | 120.4     |
| C20-C21-H21   | 120.4     | C17-C22-C21   | 123.3(17) |
| C17-C22-H22   | 118.3     | C21-C22-H22   | 118.3     |
| O2-N1-O1      | 123.3(17) | O2-N1-C1      | 119.7(17) |
| O1-N1-C1      | 116.7(18) | C7-N2-C9      | 104.3(11) |
| C7-N2-S1      | 116.2(9)  | C9-N2-S1      | 118.2(9)  |
| C11-N3-C14    | 116.8(13) | C14-N4-C13    | 118.3(16) |
| C11-N5-C10    | 132.8(12) | C11-N5-H5A    | 113.6     |
| C10-N5-H5A    | 113.6     | C15-N6-C13    | 116.2(12) |
| C15-N6-C16    | 116.2(12) | C13-N6-C16    | 118.5(11) |

|               |           |               |          |
|---------------|-----------|---------------|----------|
| C8-O5-C9      | 109.0(10) | O4-S1-O3      | 120.2(6) |
| O4-S1-N2      | 105.7(5)  | O3-S1-N2      | 106.9(6) |
| O4-S1-C3      | 107.2(5)  | O3-S1-C3      | 107.9(6) |
| N2-S1-C3      | 108.5(5)  | C1S-O1S-H1S   | 109.5    |
| O1S-C1S-H1S1  | 109.5     | O1S-C1S-H1S2  | 109.5    |
| H1S1-C1S-H1S2 | 109.5     | O1S-C1S-H1S3  | 109.5    |
| H1S1-C1S-H1S3 | 109.5     | H1S2-C1S-H1S3 | 109.5    |

---



**Supplementary Table 4.** Anisotropic atomic displacement parameters ( $\text{\AA}^2$ ) for **16f**. The anisotropic atomic displacement factor exponent takes the form:  $-2\pi^2 [ h^2 a^{*2} U_{11} + \dots + 2 h k a^* b^* U_{12} ]$

|     | $U_{11}$  | $U_{22}$  | $U_{33}$  | $U_{23}$   | $U_{13}$   | $U_{12}$   |
|-----|-----------|-----------|-----------|------------|------------|------------|
| C1  | 0.057(11) | 0.085(12) | 0.077(12) | 0.020(10)  | -0.010(9)  | -0.004(10) |
| C2  | 0.060(10) | 0.077(11) | 0.056(10) | 0.015(8)   | -0.007(8)  | 0.013(9)   |
| C3  | 0.036(8)  | 0.089(11) | 0.058(9)  | 0.030(8)   | -0.012(7)  | -0.011(7)  |
| C4  | 0.068(9)  | 0.083(11) | 0.036(7)  | 0.014(7)   | -0.009(7)  | -0.002(8)  |
| C5  | 0.106(13) | 0.108(13) | 0.036(7)  | -0.012(8)  | 0.020(9)   | 0.068(11)  |
| C6  | 0.086(13) | 0.120(15) | 0.050(9)  | -0.020(10) | -0.060(10) | 0.002(11)  |
| C7  | 0.050(8)  | 0.044(8)  | 0.049(8)  | 0.007(7)   | 0.002(6)   | -0.018(6)  |
| C8  | 0.063(10) | 0.062(9)  | 0.067(10) | -0.012(8)  | 0.002(8)   | 0.023(9)   |
| C9  | 0.053(9)  | 0.066(10) | 0.069(10) | -0.026(8)  | 0.016(8)   | -0.018(8)  |
| C10 | 0.080(12) | 0.041(8)  | 0.082(12) | -0.009(8)  | 0.028(10)  | 0.003(8)   |
| C11 | 0.051(8)  | 0.050(8)  | 0.036(7)  | -0.003(7)  | 0.003(7)   | 0.013(7)   |
| C12 | 0.031(7)  | 0.089(11) | 0.035(7)  | -0.015(7)  | -0.027(6)  | 0.016(8)   |
| C13 | 0.080(11) | 0.059(10) | 0.054(9)  | -0.014(9)  | -0.012(9)  | 0.035(10)  |
| C14 | 0.108(15) | 0.070(11) | 0.068(11) | -0.015(10) | 0.021(11)  | 0.062(12)  |
| C15 | 0.076(5)  | 0.078(5)  | 0.074(5)  | -0.001(3)  | 0.000(3)   | -0.002(3)  |
| C16 | 0.046(7)  | 0.050(9)  | 0.057(8)  | 0.003(7)   | -0.006(7)  | 0.003(7)   |
| C17 | 0.030(7)  | 0.076(11) | 0.047(8)  | -0.010(8)  | -0.012(6)  | 0.002(7)   |
| C18 | 0.059(9)  | 0.047(8)  | 0.050(8)  | -0.013(7)  | -0.013(7)  | 0.004(7)   |
| C19 | 0.061(10) | 0.069(10) | 0.076(12) | 0.023(9)   | -0.022(9)  | -0.013(9)  |
| C20 | 0.085(13) | 0.113(16) | 0.043(9)  | 0.018(10)  | -0.013(9)  | -0.032(12) |
| C21 | 0.060(11) | 0.109(14) | 0.072(12) | -0.018(11) | 0.023(10)  | 0.001(11)  |
| C22 | 0.078(12) | 0.074(11) | 0.077(12) | -0.002(11) | -0.021(11) | -0.015(10) |
| N1  | 0.102(13) | 0.137(15) | 0.058(10) | 0.009(10)  | -0.020(9)  | -0.084(11) |

|     | <b>U<sub>11</sub></b> | <b>U<sub>22</sub></b> | <b>U<sub>33</sub></b> | <b>U<sub>23</sub></b> | <b>U<sub>13</sub></b> | <b>U<sub>12</sub></b> |
|-----|-----------------------|-----------------------|-----------------------|-----------------------|-----------------------|-----------------------|
| N2  | 0.056(7)              | 0.045(7)              | 0.056(7)              | 0.001(5)              | 0.027(6)              | -0.031(6)             |
| N3  | 0.085(9)              | 0.060(8)              | 0.057(8)              | 0.006(7)              | -0.009(7)             | -0.015(8)             |
| N4  | 0.067(8)              | 0.057(7)              | 0.071(8)              | 0.001(7)              | -0.004(7)             | 0.011(7)              |
| N5  | 0.078(10)             | 0.064(9)              | 0.076(9)              | 0.030(7)              | -0.013(8)             | -0.030(8)             |
| N6  | 0.043(7)              | 0.054(7)              | 0.056(7)              | 0.001(6)              | -0.027(6)             | -0.010(6)             |
| O1  | 0.194(18)             | 0.175(16)             | 0.109(13)             | -0.028(12)            | -0.075(12)            | -0.033(14)            |
| O2  | 0.101(11)             | 0.178(15)             | 0.083(9)              | 0.021(9)              | 0.006(8)              | -0.067(10)            |
| O3  | 0.082(7)              | 0.055(6)              | 0.068(7)              | -0.003(5)             | 0.007(6)              | -0.004(6)             |
| O4  | 0.071(6)              | 0.071(7)              | 0.046(5)              | 0.006(5)              | 0.023(5)              | -0.004(6)             |
| O5  | 0.050(6)              | 0.058(6)              | 0.070(6)              | -0.021(5)             | 0.003(5)              | -0.003(5)             |
| S1  | 0.051(2)              | 0.062(2)              | 0.058(2)              | 0.0058(19)            | -0.0042(18)           | -0.002(2)             |
| O1S | 0.099(9)              | 0.098(8)              | 0.063(7)              | -0.019(7)             | 0.018(7)              | -0.012(8)             |
| C1S | 0.114(15)             | 0.113(17)             | 0.086(13)             | 0.023(12)             | 0.003(12)             | -0.060(14)            |

**Supplementary Table 5.** Hydrogen atomic coordinates and isotropic atomic displacement parameters ( $\text{\AA}^2$ ) for **16f**.

|      | <b>x/a</b> | <b>y/b</b> | <b>z/c</b> | <b>U(eq)</b> |
|------|------------|------------|------------|--------------|
| H2   | 1.1527     | 0.2292     | 1.1155     | 0.077        |
| H4   | 0.7852     | 0.0925     | 1.1397     | 0.075        |
| H5   | 0.7681     | 0.1731     | 1.3426     | 0.099        |
| H6   | 0.9433     | 0.2817     | 1.4319     | 0.104        |
| H7   | 0.9894     | 0.3236     | 0.9126     | 0.057        |
| H8A  | 0.8229     | 0.3878     | 1.0293     | 0.077        |
| H8B  | 0.7450     | 0.4245     | 0.9011     | 0.077        |
| H9   | 0.7188     | 0.0974     | 0.9027     | 0.075        |
| H10A | 0.9274     | 0.4459     | 0.7425     | 0.081        |
| H10B | 0.9820     | 0.3284     | 0.6890     | 0.081        |
| H14  | 0.4580     | 0.1991     | 0.4507     | 0.098        |
| H15A | 0.3333     | -0.0339    | 0.7582     | 0.114        |
| H15B | 0.4316     | -0.1225    | 0.8264     | 0.114        |
| H15C | 0.4554     | -0.0828    | 0.6852     | 0.114        |
| H16A | 0.3752     | 0.0808     | 0.9442     | 0.061        |
| H16B | 0.5041     | 0.1581     | 0.9453     | 0.061        |
| H18  | 0.6403     | -0.1026    | 0.9528     | 0.063        |
| H19  | 0.7301     | -0.2034    | 1.1314     | 0.083        |
| H20  | 0.6724     | -0.1498    | 1.3344     | 0.097        |
| H21  | 0.5215     | 0.0046     | 1.3575     | 0.096        |
| H22  | 0.4382     | 0.0998     | 1.1788     | 0.092        |
| H5A  | 0.7745     | 0.4035     | 0.5976     | 0.088        |
| H1S  | 0.2565     | 0.1140     | 0.4756     | 0.13         |
| H1S1 | 0.1324     | 0.0355     | 0.6640     | 0.156        |

---

|      | <b>x/a</b> | <b>y/b</b> | <b>z/c</b> | <b>U(eq)</b> |
|------|------------|------------|------------|--------------|
| H1S2 | 0.0391     | 0.0726     | 0.5471     | 0.156        |
| H1S3 | 0.1348     | 0.1642     | 0.6138     | 0.156        |

---

**Supplementary Table 6.** Normalized PMI ratios of pDOS library, natural products and FDA-approved drugs embedded with pyrimidine moieties.

| Compound    | pDOS Library |          | Compound       | Natural products <sup>2</sup> |          |
|-------------|--------------|----------|----------------|-------------------------------|----------|
|             | npr1         | npr2     |                | npr1                          | npr2     |
| <b>2a</b>   | 0.431687     | 0.954947 | Actinonin      | 0.314978                      | 0.841802 |
| <b>3b</b>   | 0.457578     | 0.764383 | Adriamycin     | 0.28322                       | 0.800172 |
| <b>4c</b>   | 0.480318     | 0.950596 | AmphotericinB  | 0.215551                      | 0.847453 |
| <b>5d</b>   | 0.425604     | 0.864353 | Apoptolidin    | 0.301694                      | 0.830875 |
| <b>6d</b>   | 0.582658     | 0.794739 | Bleomycin      | 0.404781                      | 0.826205 |
| <b>7e</b>   | 0.198477     | 0.978871 | BrefeldinA     | 0.255142                      | 0.817388 |
| <b>8e</b>   | 0.110591     | 0.946567 | BrevetoxinB    | 0.149647                      | 0.899486 |
| <b>9f</b>   | 0.279873     | 0.860449 | CalyculinA     | 0.442236                      | 0.896401 |
| <b>10f</b>  | 0.229213     | 0.87778  | Colchicine     | 0.395296                      | 0.837965 |
| <b>11f</b>  | 0.65839      | 0.910791 | Colchicine     | 0.258193                      | 0.846521 |
| <b>12f</b>  | 0.488957     | 0.808504 | Colchicine     | 0.458247                      | 0.773003 |
| <b>12f'</b> | 0.502805     | 0.714443 | Colchicine     | 0.513293                      | 0.755147 |
| <b>13f</b>  | 0.323176     | 0.714363 | CytochalasinB  | 0.431674                      | 0.740608 |
| <b>14f</b>  | 0.579194     | 0.668807 | Discodermolide | 0.182128                      | 0.981632 |
| <b>15f</b>  | 0.644331     | 0.905114 | DuocarmycinA   | 0.104513                      | 0.945885 |
| <b>16f</b>  | 0.529740     | 0.838876 | EpothiloneA    | 0.44771                       | 0.804309 |
| <b>17f</b>  | 0.574725     | 0.676289 | ErythromycinA  | 0.485996                      | 0.81381  |
| <b>18f</b>  | 0.452583     | 0.828674 | Fumagillin     | 0.066479                      | 0.974218 |
| <b>19f</b>  | 0.197015     | 0.944054 | Geldanamycin   | 0.369201                      | 0.725345 |
| <b>20f</b>  | 0.476582     | 0.803727 | Geldanamycin   | 0.392818                      | 0.769442 |
| <b>21f</b>  | 0.577074     | 0.839108 | GinkgolideB    | 0.363537                      | 0.879045 |
| <b>22f</b>  | 0.473966     | 0.836454 | Lactacystin    | 0.478299                      | 0.938709 |
| <b>23f</b>  | 0.521283     | 0.939915 | Monensin       | 0.221267                      | 0.91423  |
|             |              |          | MycobactinS    | 0.56741                       | 0.787169 |
|             |              |          | PenicillinG    | 0.227679                      | 0.84074  |
|             |              |          | PhorbolMA      | 0.403734                      | 0.770927 |
|             |              |          | PhorbolMA      | 0.512005                      | 0.787906 |

| Natural products  |          |          | Natural products      |          |          |
|-------------------|----------|----------|-----------------------|----------|----------|
| Compound          | npr1     | npr2     | Compound              | npr1     | npr2     |
| RifamycinB        | 0.53483  | 0.679088 | SQ26180               | 0.435835 | 0.794101 |
| RifamycinB        | 0.544966 | 0.674059 | Thienamycin           | 0.47668  | 0.854387 |
| RifamycinB        | 0.618686 | 0.762072 | AvermectinB 1a        | 0.278083 | 0.812448 |
| RifamycinB        | 0.524795 | 0.868426 | Calicheamicin         | 0.227585 | 0.92033  |
| RifamycinB        | 0.648821 | 0.813721 | CyclosporinA          | 0.418415 | 0.935663 |
| RifamycinB        | 0.67808  | 0.844921 | Daptomycin            | 0.762741 | 0.908347 |
| RifamycinB        | 0.627544 | 0.817624 | EchinocandinB         | 0.317238 | 0.945521 |
| RifamycinB        | 0.60182  | 0.886052 | FK506                 | 0.377179 | 0.761235 |
| SalicylihalamideA | 0.191225 | 0.84892  | Lipstatin             | 0.462998 | 0.73867  |
| Staurosporine     | 0.464212 | 0.664055 | MidecamycinA1         | 0.325184 | 0.904263 |
| Streptomycin      | 0.335744 | 0.786998 | PseudomonicAcidA      | 0.380836 | 0.748719 |
| TalaromycinB      | 0.186426 | 0.935125 | Rapamycin             | 0.445581 | 0.764618 |
| Telomestatin      | 0.496427 | 0.509642 | Taxol                 | 0.437027 | 0.832107 |
| TrapoxinB         | 0.460215 | 0.680871 | Validamycin           | 0.451444 | 0.807012 |
| Trichostatin      | 0.288807 | 0.802339 | MycoleptodisicnA      | 0.35082  | 0.758279 |
| Vancomycin        | 0.516891 | 0.626096 | SteenkrotinB          | 0.634869 | 0.834254 |
| Vincristine       | 0.482176 | 0.946784 | (+)-MuironolideA      | 0.627984 | 0.847099 |
| Quinine           | 0.303785 | 0.834042 | (-)-Morphine          | 0.50907  | 0.762043 |
| Spongistatin1     | 0.428667 | 0.817984 | (-)-Lycoramine        | 0.551205 | 0.560635 |
| ZaragozicAcidA    | 0.287707 | 0.92077  | (-)-Rocaglamide       | 0.689462 | 0.890844 |
| Arglabin          | 0.402854 | 0.721308 | SchilancitrilactonesB | 0.242841 | 0.882821 |
| Artemisinin       | 0.541282 | 0.644874 | DaphniglaucinC        | 0.797208 | 0.883075 |
| Bestatin          | 0.29757  | 0.838998 | DaphnicyclidinA       | 0.45685  | 0.651231 |
| CephameycinC      | 0.488698 | 0.85665  | (-)-DaphmanidinA      | 0.577477 | 0.720988 |
| Coformycin        | 0.298204 | 0.821609 | Anibamine             | 0.690921 | 0.808847 |
| Compactin         | 0.430983 | 0.716564 | Radicicol             | 0.490589 | 0.823386 |
| Forskolin         | 0.520873 | 0.688349 |                       |          |          |
| Mizoribine        | 0.239424 | 0.857007 |                       |          |          |
| Plaunotol         | 0.460051 | 0.90039  |                       |          |          |
| Spergualin        | 0.541169 | 0.94605  |                       |          |          |

**FDA-approved drugs embedded with  
pyrimidine moieties<sup>6</sup>**

| Compound      | npr1     | npr2     |
|---------------|----------|----------|
| Lamivudine    | 0.245638 | 0.883881 |
| Raltegravir   | 0.357692 | 0.772534 |
| Imatinib      | 0.670512 | 0.713467 |
| Erlotinib     | 0.344318 | 0.888863 |
| Lapatinib     | 0.245018 | 0.832311 |
| Rosuvastatin  | 0.221782 | 0.838978 |
| Ocinaplon     | 0.246698 | 0.771762 |
| Zaleplon      | 0.285975 | 0.826159 |
| Indiplon      | 0.275805 | 0.767635 |
| Sildenafil    | 0.491575 | 0.734667 |
| Avanafil      | 0.396445 | 0.784796 |
| Ceritinib     | 0.359299 | 0.988453 |
| Pyrimethamine | 0.406723 | 0.697858 |
| Trimethoprim  | 0.254044 | 0.862894 |
| Zidovudine    | 0.264752 | 0.939218 |

## Supplementary Methods

### 1. General Information of Synthetic Protocols

NMR spectra were obtained on an Agilent 400-MR DD2 Magnetic Resonance System (400 MHz, Agilent, USA), JEOL JNM-LA400 with LFG [400 MHz, Jeol, Japan], Varian/Oxford As-500 [500 MHz, Varian Assoc., Palo Alto, USA] or Bruker Avance III HD 800 MHz NMR Spectrometer [800 MHz, Bruker, Germany]. Chemical shifts values were recorded as parts per million ( $\delta$ ), referenced to tetramethylsilane (TMS) as the internal standard or to the residual solvent peak ( $\text{CDCl}_3$ ,  $^1\text{H}$ : 7.26,  $^{13}\text{C}$ : 77.16,  $\text{CD}_3\text{OD}$ ,  $^1\text{H}$ : 3.31,  $^{13}\text{C}$ : 49.00,  $\text{DMSO-}d_6$ ,  $^1\text{H}$ : 2.50,  $^{13}\text{C}$ : 39.52). Multiplicities were indicated as follows: s (singlet), d (doublet), t (triplet), q (quartet); m (multiplet); dd (doublet of doublet); dt (doublet of triplet); td (triplet of doublets); br s (broad singlet) and so on. Coupling constants were reported in hertz (Hz). IR spectra were measured on a Thermo Scientific Nicolet<sup>TM</sup> 6700 FT-IR spectrometer. Low resolution mass spectra were obtained on a Finnigan Surveyor MSQ Plus LC/MS [Thermo], LCQ LC/MS [Thermo] or Shimadzu LCMS-2020 using the electrospray ionization (ESI) method. High resolution mass spectra were analyzed at the Mass Spectrometry Laboratory of National Instrumentation Center for Environmental Management (NICEM) in Seoul on a LCQ LC/MS [Thermo] using the electrospray ionization (ESI) method or by Ultra High Resolution ESI Q-TOF mass spectrometer (Bruker). All commercially available reagents were used without further purification unless noted otherwise. Commercially available reagents were obtained from Sigma-Aldrich, TCI, Acros, or Alfa Aesar. All solvents were obtained by passing them through activated alumina columns of solvent purification systems from Glass Contour. Analytical thin-layer chromatography (TLC) was performed using Merck Kieselgel 60 F254 plates, and the components were visualized by observation under UV light (254 and 365 nm) or by treating the plates with ninhydrin followed by thermal visualization. Flash column chromatography was performed on Merck Kieselgel 60 (230–400 mesh). Microwave reactions were performed using the CEM Discover Benchmate and microwave reaction conditions were as indicated in the Experimental Section. HPLC purification was performed on an Agilent 1260 Infinity system with an YMC-Pack silica column (SL12S05-2520WTX, 250 mm $\times$ 20 mm, 5  $\mu\text{m}$ ).



## 2. Synthesis and Characterization of Substrates

**Synthetic procedure for the preparation of Benzyl *tert*-butyl (3-((triisopropylsilyl)oxy)propane-1,2-diyl)(*S*)-dicarbamate (SI-1).**

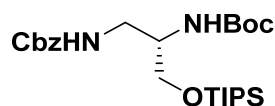

Lithium borohydride (LiBH<sub>4</sub>) (2.0 M solution in THF, 56.8 ml, 113.5 mmol) was slowly added to a stirring solution of methyl (*S*)-3-(((benzyloxy)carbonyl)amino)-2-((*tert*-butoxycarbonyl)amino)propanoate<sup>3</sup> (20.00 g, 56.76 mmol) in tetrahydrofuran (THF) (570.0 ml) at 0 °C. Then, the resulting mixture was left to stir and allowed to warm to r.t. After completion of the reaction as indicated by TLC, the reaction mixture was quenched with saturated NH<sub>4</sub>Cl(aq) and extracted twice with dichloromethane (DCM). The combined organic layer was dried over anhydrous Na<sub>2</sub>SO<sub>4</sub>(s) and filtered. The organic layer was condensed under reduced pressure, and the crude resultant was dissolved in dry DCM (570.0 ml) under argon atmosphere. To this solution were sequentially added triethylamine (Et<sub>3</sub>N) (15.83 ml, 113.5 mmol) and triisopropylsilyl trifluoromethanesulfonate (TIPS-OTf) (22.88 ml, 85.14 mmol) at 0 °C. The resulting mixture was left to stir and allowed to warm to r.t. After completion of the reaction as indicated by TLC, the resultant was quenched with saturated NH<sub>4</sub>Cl(aq) and extracted twice with DCM. The combined organic layer was dried over anhydrous Na<sub>2</sub>SO<sub>4</sub>(s) and filtered. The filtrate was condensed under reduced pressure, followed by silica-gel flash column chromatography to afford the desired product **SI-1** (22.37 g, 82% yield) as a colorless oil (Supplementary Fig. 1).

$R_f = 0.4$  (hexane/EtOAc 5:1); <sup>1</sup>H NMR (400 MHz, CDCl<sub>3</sub>) δ 7.35–7.29 (m, 5H), 5.32 (br s, 1H), 5.10 (s, 2H), 5.00 (br s, 1H), 3.77–3.73 (m, 3H), 3.47–3.39 (m, 2H), 1.43 (s, 9H), 1.06 (m, 21H); <sup>13</sup>C NMR (100 MHz, CDCl<sub>3</sub>) δ 157.0, 156.1, 136.7, 128.6, 128.11, 128.07, 79.6, 66.8, 64.3, 51.8, 43.5, 28.4, 18.0, 11.9; LRMS(ESI<sup>+</sup>): Calcd for C<sub>25</sub>H<sub>45</sub>N<sub>2</sub>O<sub>5</sub>Si<sup>+</sup> [M+H]<sup>+</sup> 481.31, found 481.11.

**Synthetic procedure for the preparation of *tert*-butyl (*S*)-(1-((6-chloro-5-formylpyrimidin-4-yl)amino)-3-((triisopropylsilyl)oxy)propan-2-yl)carbamate (**SI-2**).**

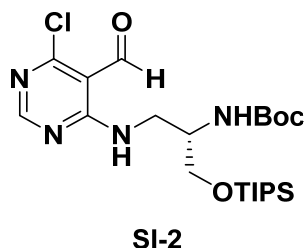

To a solution of **SI-1** (22.37 g, 46.54 mmol) in methanol (MeOH) (470.0 ml) was carefully added 10 wt. % Pd/C (11.19 g) and the mixture was vigorously stirred under H<sub>2</sub> atmosphere (1 atm) at r.t. After completion of the reaction as indicated by TLC, the reaction mixture was filtered through Celite<sup>®</sup> while washing with ethyl acetate. The filtrate was condensed under reduced pressure and the crude resultant was dissolved in chloroform (CHCl<sub>3</sub>, 470.0 ml). To this solution were sequentially added Et<sub>3</sub>N (9.737 ml, 69.81 mmol) and 4,6-dichloropyrimidine-5-carboxaldehyde (8.237 g, 46.54 mmol) at 0 °C and left to stir. After 30 min, the reaction mixture was quenched with saturated NH<sub>4</sub>Cl(aq). The resultant was extracted twice with CHCl<sub>3</sub>, dried over anhydrous Na<sub>2</sub>SO<sub>4</sub>(s), and filtered. The filtrate was condensed under reduced pressure and purified by silica-gel flash column chromatography to afford the desired product **SI-2** (15.19 g, 67% yield) as a colorless oil (Supplementary Fig. 1).

$R_f = 0.5$  (hexane/EtOAc 3:1); <sup>1</sup>H NMR (400 MHz, CDCl<sub>3</sub>) δ 10.28 (s, 1H), 9.30 (t,  $J = 5.7$  Hz, 1H), 8.34 (s, 1H), 4.99 (d,  $J = 8.6$  Hz, 1H), 3.90–3.62 (m, 5H), 1.33 (s, 9H), 1.06 (m, 21H); <sup>13</sup>C NMR (100 MHz, CDCl<sub>3</sub>) δ 191.1, 165.3, 161.7, 160.7, 155.6, 108.2, 79.5, 63.7, 51.4, 42.4, 28.3, 17.9, 11.9; LRMS (ESI<sup>+</sup>): Calcd for C<sub>22</sub>H<sub>40</sub>ClN<sub>4</sub>O<sub>4</sub>Si<sup>+</sup> [M+H]<sup>+</sup> 487.25, found 487.03.

#### **General procedure for the preparation of 1a–c and 1e–f.**

To a stirring solution of **SI-2** (500 mg, 1.026 mmol) and K<sub>2</sub>CO<sub>3</sub> (283.6 mg, 2.052 mmol) in *N,N*-dimethylformamide (DMF) (10.0 ml) was added amine<sup>4,5</sup> (1.539 mmol) and the resulting mixture was stirred at 40 °C. After completion of the reaction as indicated by TLC, the resultant

was quenched with saturated NH<sub>4</sub>Cl(aq) and extracted twice with ethyl acetate. The combined organic layer was dried over anhydrous Na<sub>2</sub>SO<sub>4</sub>(s) and filtered. The organic solvent was evaporated under vacuum to afford a crude oil, which was purified by silica-gel flash column chromatography to afford **SI-3**. To obtain the cyclic imine product **1**, **SI-3** was first treated with 10% trifluoroacetic acid (TFA) in DCM (20.0 ml) at r.t. After the starting material was consumed as indicated by TLC, any excess TFA was removed by azeotropic evaporation with toluene under reduced pressure, and the crude resultant was dissolved in 1% acetic acid (AcOH) in CHCl<sub>3</sub> (100.0 ml). The resulting mixture was stirred at 40 °C. After completion of the reaction as indicated by TLC, the resultant was quenched with saturated NaHCO<sub>3</sub>(aq) and extracted twice with CHCl<sub>3</sub>. The combined organic layer was dried over anhydrous Na<sub>2</sub>SO<sub>4</sub>(s) and filtered. The filtrate was condensed under reduced pressure, followed by silica-gel flash column chromatography to afford the desired product **1** (Supplementary Fig. 2).

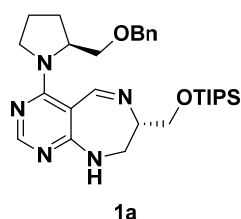

**(S)-4-((S)-2-((benzyloxy)methyl)pyrrolidin-1-yl)-7-(((triisopropylsilyl)oxy)methyl)-8,9-dihydro-7H-pyrimido[4,5-e][1,4]diazepine (1a)**. A pale yellow oil;  $R_f = 0.2$  (DCM/MeOH = 20:1); 403.1 mg, 75% overall yield; <sup>1</sup>H NMR (400 MHz, CDCl<sub>3</sub>) δ 8.11 (s, 1H), 7.98 (s, 1H), 7.29 (m, 5H), 5.97 (br s, 1H), 4.74 (m, 1H), 4.54, 4.53 (ABq,  $J_{AB} = 12.1$  Hz, 2H), 4.18 (dd,  $J = 9.8, 4.7$  Hz, 1H), 3.90 (m, 1H), 3.80 (dd,  $J = 12.5, 5.5$  Hz, 1H), 3.73 (m, 2H), 3.67 (m, 1H), 3.60 (dd,  $J = 9.4, 5.9$  Hz, 1H), 3.47 (m, 1H), 3.34 (dd,  $J = 11.3, 7.0$  Hz, 1H), 2.15 (m, 1H), 1.96 (m, 2H), 1.71 (m, 1H), 1.08 (m, 21H); <sup>13</sup>C NMR (100 MHz, CDCl<sub>3</sub>) δ 164.5, 160.9, 159.1, 157.4, 138.6, 128.4, 127.6, 127.5, 93.1, 73.3, 71.1, 65.1, 64.2, 58.0, 55.2, 47.8, 28.0, 26.1, 18.2, 12.0; HRMS(ESI<sup>+</sup>): Calcd for C<sub>29</sub>H<sub>46</sub>N<sub>5</sub>O<sub>2</sub>Si<sup>+</sup> [M+H]<sup>+</sup> 524.3415, found 524.3414, Δppm -0.19.

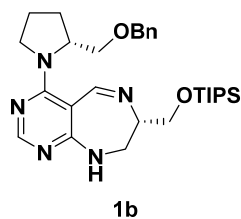

**(S)-4-((R)-2-((benzyloxy)methyl)pyrrolidin-1-yl)-7-(((triisopropylsilyl)oxy)methyl)-8,9-dihydro-7H-pyrimido[4,5-e][1,4]diazepine (1b).** A pale yellow oil;  $R_f = 0.2$  (DCM/MeOH = 20:1); 408.4 mg, 76% overall yield;  $^1\text{H}$  NMR (400 MHz,  $\text{CDCl}_3$ )  $\delta$  8.14 (s, 1H), 7.96 (s, 1H), 7.30 (m, 5H), 6.20 (br s, 1H), 4.74 (m, 1H), 4.53 (s, 2H), 4.19 (dd,  $J = 9.7, 3.1$  Hz, 1H), 4.02 (m, 1H), 3.84 (m, 1H), 3.74 (m, 2H), 3.63 (m, 2H), 3.46 (t,  $J = 9.7$  Hz, 1H), 3.14 (m, 1H), 2.14 (m, 1H), 1.99 (m, 2H), 1.74 (m, 1H), 1.09 (m, 21H);  $^{13}\text{C}$  NMR (100 MHz,  $\text{CDCl}_3$ )  $\delta$  165.0, 164.2, 156.4, 154.0, 138.4, 128.2, 127.4, 127.4, 92.0, 73.1, 70.8, 65.3, 65.0, 57.9, 55.2, 46.6, 27.8, 25.8, 18.0, 11.8; HRMS(ESI<sup>+</sup>): Calcd for  $\text{C}_{29}\text{H}_{46}\text{N}_5\text{O}_2\text{Si}^+$   $[\text{M}+\text{H}]^+$  524.3415, found 524.3415.

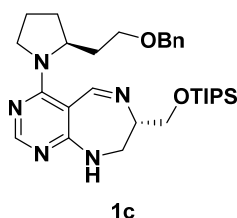

**(S)-4-((S)-2-(2-(benzyloxy)ethyl)pyrrolidin-1-yl)-7-(((triisopropylsilyl)oxy)methyl)-8,9-dihydro-7H-pyrimido[4,5-e][1,4]diazepine (1c).** A colorless oil;  $R_f = 0.35$  (DCM/MeOH = 20:1); 419.4 mg, 76% overall yield;  $^1\text{H}$  NMR (400 MHz,  $\text{CDCl}_3$ )  $\delta$  8.07 (s, 1H), 7.99 (s, 1H), 7.33 (m, 4H), 7.29–7.26 (m, 1H), 6.17 (br s, 1H), 4.61 (m, 1H), 4.53, 4.26 (ABq,  $J_{AB} = 11.94$  Hz, 2H), 4.18 (dd,  $J = 9.8, 4.3$  Hz, 1H), 3.92 (m, 1H), 3.81–3.62 (m, 3H), 3.60–3.56 (m, 2H), 3.45 (m, 1H), 3.33 (m, 1H), 2.33–2.25 (m, 1H), 2.19–2.13 (m, 1H), 1.91–1.87 (m, 1H), 1.80–1.66 (m, 3H), 1.08 (m, 21H);  $^{13}\text{C}$  NMR (100 MHz,  $\text{CDCl}_3$ )  $\delta$  164.8, 161.1, 159.0, 157.4, 138.6, 128.4, 127.8, 127.6, 93.2, 73.0, 67.7, 65.1, 64.3, 56.9, 55.1, 47.6, 34.1, 31.0, 26.2, 18.1, 12.0; HRMS(ESI<sup>+</sup>): Calcd for  $\text{C}_{30}\text{H}_{48}\text{N}_5\text{O}_2\text{Si}^+$   $[\text{M}+\text{H}]^+$  538.3572, found 538.3571,  $\Delta\text{ppm} -0.19$ .

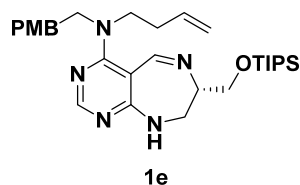

**(S)-N-(but-3-en-1-yl)-N-(4-methoxyphenethyl)-7-(((triisopropylsilyl)oxy)methyl)-8,9-dihydro-7H-pyrimido[4,5-e][1,4]diazepin-4-amine (1e).** A pale yellow oil;  $R_f = 0.4$  (DCM/MeOH = 20:1); 364.2 mg, 66% overall yield;  $^1\text{H NMR}$  (400 MHz,  $\text{CDCl}_3$ )  $\delta$  8.05 (s, 1H), 7.98 (d,  $J = 1.9$  Hz, 1H), 7.07 (d,  $J = 8.6$  Hz, 2H), 6.80 (d,  $J = 8.6$  Hz, 2H), 6.42 (m, 1H), 5.72 (dddd,  $J = 16.8, 10.1, 6.6, 6.6$  Hz, 1H), 5.02 (m, 2H), 4.18 (dd,  $J = 9.7, 4.3$  Hz, 1H), 3.84 (m, 3H), 3.77 (s, 3H), 3.69 (m, 2H), 3.46 (m, 1H), 3.34 (m, 2H), 2.83 (t,  $J = 7.4$  Hz, 2H), 2.33 (q,  $J = 7.0$  Hz, 2H), 1.08 (m, 21H);  $^{13}\text{C NMR}$  (100 MHz,  $\text{CDCl}_3$ )  $\delta$  167.2, 161.9, 158.2, 157.8, 157.1, 135.2, 131.0, 129.7, 117.0, 114.0, 94.3, 65.2, 64.5, 55.3, 53.5, 51.2, 47.6, 33.7, 32.6, 18.1, 12.0; HRMS(ESI<sup>+</sup>): Calcd for  $\text{C}_{30}\text{H}_{48}\text{N}_5\text{O}_2\text{Si}^+$   $[\text{M}+\text{H}]^+$  538.3572, found 538.3572.

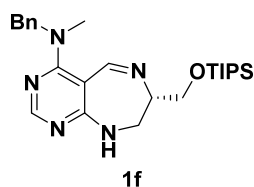

**(S)-N-benzyl-N-methyl-7-(((triisopropylsilyl)oxy)methyl)-8,9-dihydro-7H-pyrimido[4,5-e][1,4]diazepin-4-amine (1f).** A colorless oil;  $R_f = 0.35$  (DCM/MeOH = 20:1); 349.1 mg, 75% overall yield;  $^1\text{H NMR}$  (400 MHz,  $\text{CDCl}_3$ )  $\delta$  8.17 (d,  $J = 1.9$  Hz, 1H), 8.06 (s, 1H), 7.35–7.25 (m, 5H), 6.99 (br s, 1H), 4.81, 4.71 (ABq,  $J_{\text{AB}} = 15.2$  Hz, 2H), 4.18 (dd,  $J = 9.8, 4.3$  Hz, 1H), 3.89 (m, 2H), 3.66 (t,  $J = 10.0$  Hz, 1H), 3.32 (ddd,  $J = 13.0, 7.1, 2.5$  Hz, 1H), 3.03 (s, 3H), 1.08 (m, 21H);  $^{13}\text{C NMR}$  (100 MHz,  $\text{CDCl}_3$ )  $\delta$  167.4, 162.4, 157.2, 157.1, 137.3, 128.7, 127.7, 127.4, 92.7, 65.1, 64.5, 56.6, 47.3, 40.1, 18.0, 11.9; HRMS(ESI<sup>+</sup>): Calcd for  $\text{C}_{25}\text{H}_{40}\text{N}_5\text{OSi}^+$   $[\text{M}+\text{H}]^+$  454.2997, found 454.2996,  $\Delta\text{ppm} -0.22$ .

(S)-4-(prop-1-en-2-yl)-7-(((triisopropylsilyl)oxy)methyl)-8,9-dihydro-7H-pyrimido[4,5-e][1,4]diazepine (**1d**).

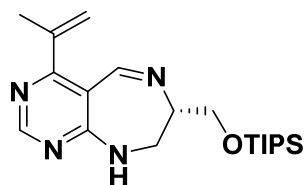

**1d**

Palladium tetrakis(triphenylphosphine) Pd(PPh<sub>3</sub>)<sub>4</sub> (119.0 mg, 0.103 mmol, 10 mol%) was added to a vigorously stirring solution of **SI-2** (500 mg, 1.026 mmol), isopropenylboronic acid pinacol ester (0.290 ml, 1.539 mmol), and Na<sub>2</sub>CO<sub>3</sub> (380.6 mg, 3.591 mmol.) in toluene–water solvent mixture (25.0 ml/25.0 ml) at r.t. The resulting mixture was stirred at 80 °C. After completion of the reaction as indicated by TLC, the reaction mixture was diluted with ethyl acetate, washed with brine, dried over anhydrous Na<sub>2</sub>SO<sub>4</sub>(s), and filtered. The filtrate was condensed under reduced pressure and the residue was purified with silica-gel flash column chromatography to provide compound **SI-4** (379.2 mg, 75% yield). To obtain the cyclic imine products **1d**, **SI-4** (379.2 mg, 0.770 mmol) was first treated with 10% TFA in DCM (100.0 ml). After the starting material was consumed as indicated by TLC, the resultant was quenched with saturated NaHCO<sub>3</sub>(aq) and extracted twice with DCM. The combined organic layer was dried over anhydrous Na<sub>2</sub>SO<sub>4</sub>(s) and filtered. The filtrate was condensed under reduced pressure and the crude resultant was dissolved in DCM (100.0 ml). To this solution was added Na<sub>2</sub>SO<sub>4</sub>(s) (2.915 g, 20.52 mmol) and the resulting mixture was stirred at 40 °C. After completion of the reaction as indicated by TLC, the reaction mixture was filtered and concentrated *in vacuo*. The residue was purified with silica-gel flash column chromatography to afford the desired cyclic imine product **1d** (234.4 mg, 81% yield, 61% overall yield) as a colorless oil (Supplementary Fig. 3).

$R_f = 0.2$  (DCM/MeOH 20:1); <sup>1</sup>H NMR (400 MHz, CDCl<sub>3</sub>) δ 8.47 (d,  $J = 2.3$  Hz, 1H), 8.43 (s, 1H), 7.37 (br d,  $J = 5.0$  Hz, 1H), 5.54 (s, 1H), 5.10 (s, 1H), 4.27 (dd,  $J = 9.7, 4.7$  Hz, 1H), 3.95 (dd,  $J = 13.0, 7.0$  Hz, 1H), 3.81 (m, 1H), 3.69 (t,  $J = 10.1$  Hz, 1H), 3.19 (m, 1H), 2.17 (s, 3H), 1.08 (m, 21H); <sup>13</sup>C NMR (100 MHz, CDCl<sub>3</sub>) δ 172.2, 161.0, 158.0, 157.9, 142.2, 120.9, 107.3, 65.2, 64.8, 47.4, 22.3, 18.1, 11.9; HRMS(ESI+): Calcd for C<sub>20</sub>H<sub>35</sub>N<sub>4</sub>O<sup>+</sup> [M+H]<sup>+</sup> 375.2575, found 375.2574, Δppm –0.27.

## Synthetic procedure for the preparation of 2a

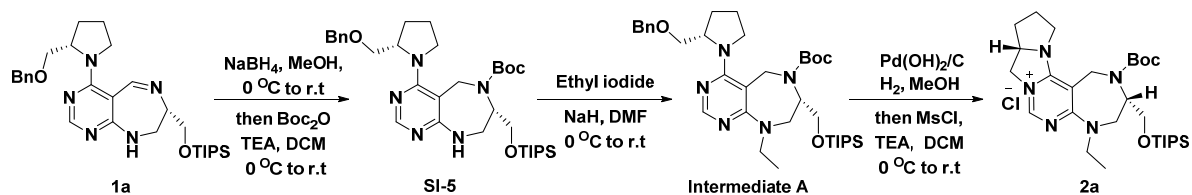

**Compound 2a.** To a stirring solution of **1a** (403.1 mg, 0.770 mmol) in MeOH (8.0 ml) was added sodium borohydride (NaBH<sub>4</sub>) (145.6 mg, 3.850 mmol) at 0 °C. The resulting mixture was left to stir and allowed to warm to r.t. After completion of the reaction as indicated by TLC, the resultant was quenched with saturated NaHCO<sub>3</sub>(aq) and extracted twice with DCM. The combined organic layer was dried over anhydrous Na<sub>2</sub>SO<sub>4</sub>(s) and filtered. The organic solvent was evaporated under reduced pressure, and the crude resultant was dissolved in DCM (8.0 ml). To this solution were sequentially added Et<sub>3</sub>N (0.215 ml, 1.540 mmol) and di-*tert*-butyl dicarbonate (Boc<sub>2</sub>O) (218.5 mg, 1.001 mmol) at 0 °C. The resulting mixture was left to stir and allowed to warm to r.t. After completion of the reaction as indicated by TLC, the resultant was quenched with saturated NH<sub>4</sub>Cl(aq) and extracted twice with DCM. The combined organic layer was dried over anhydrous Na<sub>2</sub>SO<sub>4</sub>(s) and the filtrate was condensed under reduced pressure, followed by silica-gel flash column chromatography to afford **SI-5** (260.3 mg, 54% yield). To a solution of **SI-5** (260.3 mg, 0.416 mmol) in DMF (4.0 ml) under argon atmosphere was added NaH (60% dispersion in mineral oil, 33.28 mg, 0.832 mmol) at 0 °C and left to stir. After 30 min, ethyl iodide (0.067 ml, 0.832 mmol) was slowly added and the mixture was allowed to slowly warm to r.t. After the starting material was consumed as indicated by TLC, the reaction mixture was quenched with saturated NH<sub>4</sub>Cl(aq). The resultant was extracted twice with ethyl acetate, dried with anhydrous Na<sub>2</sub>SO<sub>4</sub>(s), filtered, and concentrated *in vacuo*. The residue was purified by silica-gel flash column chromatography to obtain intermediate **A** (258.5 mg, 95% yield). To a solution of intermediate **A** (258.3 mg, 0.395 mmol) in MeOH (4.0 ml) was added 20 wt. % Pd(OH)<sub>2</sub>/C (25.9 mg) and then, the mixture was vigorously stirred under H<sub>2</sub> atmosphere (1 atm) at r.t. After completion of the reaction as indicated by TLC, the reaction mixture was filtered through Celite<sup>®</sup> while washing with ethyl acetate. The filtrate was condensed under reduced pressure and the crude resultant was dissolved in DCM (4.0 ml). To this solution were sequentially added Et<sub>3</sub>N (0.165 ml, 1.185 mmol) and methanesulfonyl chloride (MsCl) (0.061 ml, 0.790 mmol) at 0 °C. The resulting mixture was allowed to slowly

warm up to r.t. After completion of the reaction indicated by TLC, the reaction mixture was diluted with DCM and washed twice with 1N HCl. The resultant was dried with anhydrous  $\text{Na}_2\text{SO}_4(\text{s})$ , filtered, condensed under reduced pressure, and purified by silica-gel flash column chromatography to afford the desired product **2a** (280.6 mg, 61 % yield, 31% overall yield) as a white solid;

$R_f = 0.1$  (DCM/MeOH = 10:1);  $^1\text{H}$  NMR (400 MHz,  $\text{DMSO-}d_6$ , 100 °C)  $\delta$  8.50 (s, 1H), 4.64 (m, 2H), 4.48 (m, 2H), 4.33 (m, 2H), 4.13 (m, 1H), 3.82 (m, 2H), 3.76 (m, 1H), 3.69 (m, 1H), 3.62 (dd,  $J = 15.1, 4.6$  Hz, 1H), 3.57 (m, 1H), 3.42 (m, 1H), 2.14 (m, 1H), 2.04 (m, 2H), 1.66 (m, 1H), 1.32 (br s, 9H), 1.17 (t,  $J = 7.1$  Hz, 3H), 1.08 (m, 21H);  $^{13}\text{C}$  NMR (100 MHz,  $\text{DMSO-}d_6$ , 100 °C)  $\delta$  162.0, 155.8, 154.0, 146.5, 79.3, 62.8, 62.4., 50.8, 50.2, 48.9, 45.1, 29.6, 27.4, 25.7, 17.2, 12.4, 11.0; IR (neat)  $\nu_{\text{max}}$ : 2940, 2866, 1698, 1638, 1523, 1174  $\text{cm}^{-1}$ ; HRMS(ESI+): Calcd for  $\text{C}_{29}\text{H}_{52}\text{N}_5\text{O}_3\text{Si}^+$   $[\text{M}]^+$  546.3834, found 546.3831,  $\Delta\text{ppm} -0.55$ ; mp: 136–138 °C.

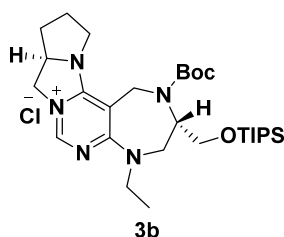

**Compound 3b.** A pale yellow solid;  $R_f = 0.1$  (DCM/MeOH = 10:1); 38% overall yield;  $^1\text{H}$  NMR (400 MHz,  $\text{DMSO-}d_6$ , 100 °C)  $\delta$  8.42 (s, 1H), 4.88 (d,  $J = 16.9$  Hz, 1H), 4.58 (d,  $J = 16.9$  Hz, 1H), 4.54 (dd,  $J = 10.8, 9.4$  Hz, 1H), 4.38 (m, 2H), 4.27 (dd,  $J = 10.9, 8.2$  Hz, 1H), 4.16 (dd,  $J = 15.1, 11.9$  Hz, 1H), 3.86 (m, 2H), 3.80 (m, 2H), 3.70 (m, 2H), 3.65 (m, 1H), 2.17 (m, 3H), 1.73 (m, 1H), 1.41 (s, 9H), 1.18 (t,  $J = 6.9$  Hz, 3H), 1.09 (m, 21H);  $^{13}\text{C}$  NMR (100 MHz,  $\text{DMSO-}d_6$ , 100 °C)  $\delta$  162.3, 153.8, 152.8, 146.5, 93.0, 79.8, 63.2, 62.5, 56.9, 50.6, 49.0, 48.0, 46.1, 36.7, 29.2, 27.5, 26.6, 17.2, 12.3, 10.9; IR (neat)  $\nu_{\text{max}}$ : 2944, 2863, 1698, 1636, 1517, 1166  $\text{cm}^{-1}$ ; HRMS(ESI+): Calcd for  $\text{C}_{29}\text{H}_{52}\text{N}_5\text{O}_3\text{Si}^+$   $[\text{M}]^+$  546.3834, found 546.3833,  $\Delta\text{ppm} -0.18$ ; mp: 77–79 °C. The product was synthesized according to the synthetic procedure for the preparation of **2a** from **1b**.



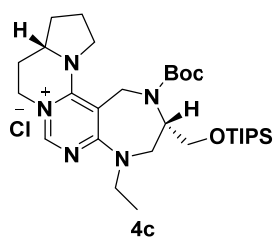

**Compound 4c.** A pale yellow solid;  $R_f = 0.2$  (DCM/MeOH = 10:1); 40 % overall yield;  $^1\text{H}$  NMR (400 MHz, DMSO- $d_6$ , 100 °C)  $\delta$  8.34 (s, 1H), 4.48 (m, 2H), 4.23 (m, 2H), 4.05 (m, 1H), 3.85 (m, 2H), 3.79 (m, 2H), 3.71 (m, 3H), 3.61 (dd,  $J = 15.0, 4.6$  Hz, 1H), 3.53 (m, 1H), 3.06 (br s, 1H), 3.00 (m, 1H), 2.18 (m, 1H), 1.91 (m, 3H), 1.29 (br s, 9H), 1.18 (t,  $J = 7.0$  Hz, 3H), 1.09 (m, 21H);  $^{13}\text{C}$  NMR (100 MHz, DMSO- $d_6$ , 100 °C)  $\delta$  161.5, 153.1, 149.2, 149.2, 71.7, 63.9, 56.3, 55.8, 49.7, 49.0, 46.8, 30.5, 28.4, 25.0, 23.6, 18.2, 13.7, 12.0; IR (neat)  $\nu_{\text{max}}$ : 2946, 2867, 1694, 1625, 1529, 1457, 1116  $\text{cm}^{-1}$ ; HRMS(ESI+): Calcd for  $\text{C}_{30}\text{H}_{54}\text{N}_5\text{O}_3\text{Si}^+$  [M] $^+$  560.3990, found 560.3993,  $\Delta\text{ppm} -0.54$ .; mp: 71–73 °C. The product was synthesized according to the synthetic procedure for the preparation of **2a** from **1c**.

### Synthetic procedure for the preparation of **5d**

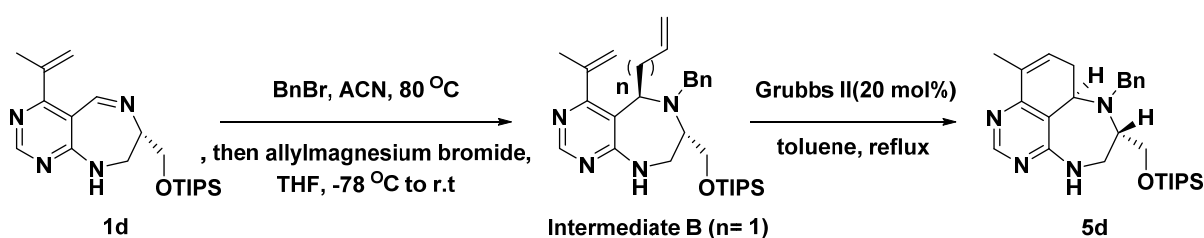

**Intermediate B (n=1).** To a stirring solution of **1d** (100 mg, 0.267 mmol) in acetonitrile (ACN) (13.5 ml), benzyl bromide (0.048 ml, 0.401 mmol) was added and the resulting mixture was stirred at 80 °C. After completion of the reaction indicated by TLC, the organic solvent was removed under reduced pressure and the crude resultant was washed with hexane to remove any excess benzyl bromide. To a cooled solution of resultant iminium ion in dry THF (27.0 ml) was added allylmagnesium bromide (1.0 M solution in diethyl ether, 1.335 ml, 1.335 mmol) dropwise over 30 min at  $-78$  °C. The reaction mixture was allowed to slowly warm to r.t over an 18 h period. The resultant was quenched with saturated  $\text{NH}_4\text{Cl}$ (aq) and extracted twice with

DCM. The combined organic layer was dried over anhydrous  $\text{Na}_2\text{SO}_4(\text{s})$  and filtered. The filtrate was condensed under reduced pressure, followed by flash column chromatography to afford intermediate **B** ( $n=1$ , 115.0 mg, 85% yield, d.r. >99:1) as a pale yellow oil.

$R_f=0.5$  (hexane/EtOAc = 1:1);  $^1\text{H}$  NMR (400 MHz,  $\text{CDCl}_3$ )  $\delta$  8.40 (s, 1H), 7.32–7.29 (m, 3H), 7.24–7.20 (m, 2H), 5.88–5.78 (m, 2H), 5.03 (m, 2H), 4.94 (s, 1H), 4.69 (s, 1H), 4.29 (dd,  $J=9.4, 5.9$  Hz, 1H), 3.86 (d,  $J=15.3$  Hz, 1H), 3.78 (dd,  $J=9.6, 3.7$  Hz, 1H), 3.64–3.57 (m, 3H), 3.50–3.40 (m, 2H), 2.84 (m, 1H), 2.22 (m, 1H), 1.81 (s, 3H), 1.01 (s, 21H);  $^{13}\text{C}$  NMR (100 MHz,  $\text{CDCl}_3$ )  $\delta$  168.4, 164.6, 155.6, 143.0, 140.1, 136.0, 128.4, 127.7, 126.9, 116.7, 116.3, 116.0, 64.4, 59.3, 57.9, 53.0, 43.3, 37.1, 23.0, 18.1, 11.9; HRMS(ESI+): Calcd for  $\text{C}_{30}\text{H}_{47}\text{N}_4\text{OSi}^+$   $[\text{M}+\text{H}]^+$  507.3514, found 507.3516,  $\Delta\text{ppm} +0.39$ . The diastereomeric ratio was determined by LC-MS analysis of crude reaction mixture and by  $^1\text{H}$  NMR analysis of samples purified by short silica-gel column (Supplementary Fig. 7 and 34).

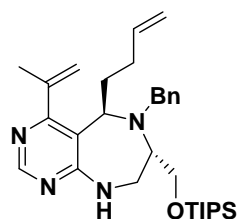

Intermediate B ( $n=2$ )

**Intermediate B ( $n=2$ ).** A yellow oil;  $R_f=0.5$  (hexane/EtOAc = 1:1); 120.8 mg, 87% yield; d.r. >99:1;  $^1\text{H}$  NMR (400 MHz,  $\text{CDCl}_3$ )  $\delta$  8.40 (s, 1H), 7.33–7.21 (m, 5H), 5.78 (m, 1H), 5.55 (d,  $J=5.1$  Hz, 1H), 5.01 (dd,  $J=17.2, 1.2$  Hz, 1H), 4.94 (m, 2H), 4.72 (s, 1H), 4.21 (dd,  $J=10.2, 5.1$  Hz, 1H), 3.84 (m, 2H), 3.64–3.54 (m, 3H), 3.48–3.37 (m, 2H), 2.33–2.17 (m, 2H), 2.11–2.04 (m, 1H), 1.83 (s, 3H), 1.45–1.36 (m, 1H), 1.06 (m, 21H);  $^{13}\text{C}$  NMR (100 MHz,  $\text{CDCl}_3$ )  $\delta$  168.5, 164.7, 155.6, 143.1, 140.2, 138.2, 128.4, 127.8, 127.0, 117.7, 116.0, 114.9, 64.7, 59.2, 57.5, 52.6, 43.4, 31.7, 30.9, 23.1, 18.1, 12.0; HRMS(ESI+): Calcd for  $\text{C}_{31}\text{H}_{49}\text{N}_4\text{OSi}^+$   $[\text{M}+\text{H}]^+$  521.3670, found 521.3670. The product was synthesized according to the synthetic procedure for the preparation of **Intermediate B ( $n=1$ )** from **1d** and 3-butenylmagnesium bromide (0.2 M solution in THF). The diastereomeric ratio was determined by LC-MS analysis of crude reaction mixture and by  $^1\text{H}$  NMR analysis of samples purified by short silica-gel column (Supplementary Fig. 8 and 35).

**Compound 5d.** To a solution of intermediate **B** (115.0 mg, 0.227 mmol) in toluene (11.5 ml) was added 2<sup>nd</sup> generation Grubbs' catalyst (38.20 mg, 0.045 mmol, 20 mol%) and the mixture was left to stir at reflux. After the starting material was indicated as by TLC, the organic solvent was removed under reduced pressure, and the residue was purified by silica-gel flash column chromatography to obtain the desired product **5d** (79.34 mg, 73 % yield, 62% overall yield) as a pale yellow oil.

$R_f = 0.4$  (hexane/EtOAc = 2:1);  $^1\text{H NMR}$  (400 MHz,  $\text{CDCl}_3$ )  $\delta$  8.43 (s, 1H), 7.34–7.18 (m, 5H), 6.08 (br s, 1H), 5.87 (d, 6.3 Hz, 1H), 5.08 (t,  $J = 11.0$  Hz, 1H), 4.16, 3.99 (ABq,  $J_{AB} = 14.9$  Hz, 2H), 3.87 (t,  $J = 13.3$  Hz, 1H), 3.54–3.41 (m, 3H), 3.17 (m, 1H), 2.54 (d,  $J = 10.5$  Hz, 2H), 2.03 (s, 3H), 0.97 (m, 21 H);  $^{13}\text{C NMR}$  (100 MHz,  $\text{CDCl}_3$ )  $\delta$  164.2, 160.4, 156.4, 141.1, 132.6, 130.4, 128.3, 128.1, 126.7, 110.9, 66.1, 61.8, 54.6, 50.5, 46.7, 29.5, 18.3, 17.9, 11.8; IR (neat)  $\nu_{\text{max}}$ : 3241, 3028, 2940, 2865, 1565, 1460, 1116, 1066  $\text{cm}^{-1}$ ; HRMS(ESI<sup>+</sup>): Calcd for  $\text{C}_{28}\text{H}_{43}\text{N}_4\text{OSi}^+$   $[\text{M}+\text{H}]^+$  479.3201, found 479.3206,  $\Delta\text{ppm} +1.04$ . The stereochemistry of this product was confirmed by Nuclear Overhauser Effect (NOE) spectroscopy. 1D-NOE result supported the stereochemistry as shown in Supplementary Fig. 37.

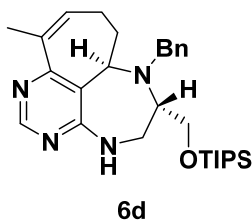

**Compound 6d.** A yellow oil;  $R_f = 0.4$  (hexane/EtOAc = 2:1); 87.95 mg, 72% yield, 63% overall yield;  $^1\text{H NMR}$  (400 MHz,  $\text{CDCl}_3$ )  $\delta$  8.42 (s, 1H), 7.22–7.12 (m, 5H), 6.10 (t,  $J = 6.7$  Hz, 1H), 5.82 (d,  $J = 5.5$  Hz, 1H), 3.84–3.76 (m, 5H), 3.65 (dd,  $J = 11.7, 7.0$  Hz, 1H), 3.49 (m, 1H), 2.89 (m, 1H), 2.48 (m, 1H), 2.10 (m, 2H), 1.91 (s, 3H), 1.84 (m, 1H), 1.26 (m, 21H);  $^{13}\text{C NMR}$  (100 MHz,  $\text{CDCl}_3$ )  $\delta$  164.5, 164.1, 154.9, 140.0, 137.4, 131.8, 128.1, 127.4, 126.7, 117.1, 62.3, 61.2, 57.6, 56.3, 43.0, 35.4, 23.6, 20.1, 17.9, 11.8; IR (neat)  $\nu_{\text{max}}$ : 3241, 2944, 2865, 1570, 1462, 1102, 883  $\text{cm}^{-1}$ ; HRMS(ESI<sup>+</sup>): Calcd for  $\text{C}_{29}\text{H}_{45}\text{N}_4\text{OSi}^+$   $[\text{M}+\text{H}]^+$  493.3357, found 493.3349,  $\Delta\text{ppm} +0.41$ . The product was synthesized according to the synthetic procedure for the preparation of **5d** from **Intermediate B** ( $n=2$ ). The stereochemistry of this product was confirmed by NOE spectroscopy. 1D-NOE result supported the stereochemistry as shown in Supplementary Fig. 39.

## Synthetic procedure for the preparation of 7e

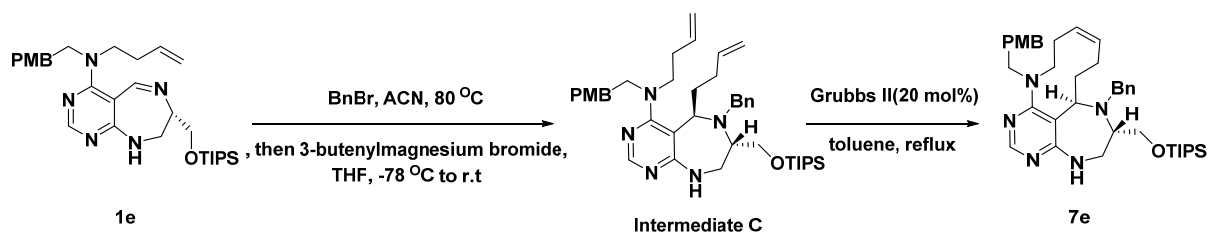

**Compound 7e.** To a stirring solution of **1e** (120 mg, 0.223 mmol) in acetonitrile (ACN) (11.0 ml), benzyl bromide (0.040 ml, 0.335 mmol) was added and the resulting mixture was stirred at  $80\text{ }^\circ\text{C}$ . After completion of the reaction indicated by TLC, the organic solvent was removed under reduced pressure and the crude resultant was washed with hexane to remove any excess benzyl bromide. To a cooled solution of resultant iminium ion in dry THF (22.0 ml) was added 3-butenylmagnesium bromide (0.2 M solution in THF, 5.575 ml, 1.115 mmol) dropwise over 30 min at  $-78\text{ }^\circ\text{C}$ . The reaction mixture was allowed to slowly warm to r.t. over an 18 h period. The resultant was quenched with saturated  $\text{NH}_4\text{Cl}$ (aq) and extracted twice with DCM. The combined organic layer was dried over anhydrous  $\text{Na}_2\text{SO}_4$ (s) and filtered. The filtrate was condensed under reduced pressure, followed by flash column chromatography to afford intermediate **C** (122.0 mg, 80% yield, d.r. 95:5). The diastereomeric ratio was determined by LC-MS analysis of crude reaction mixture (Supplementary Fig. 9). To a solution of intermediate **C** (122.0 mg, 0.178 mmol) in toluene (36.0 ml) was added 2<sup>nd</sup> generation Grubbs' catalyst (30.22 mg, 0.036 mmol, 20 mol%) and the mixture was left to stir at reflux. After the starting material was indicated as by TLC, the organic solvent was removed under reduced pressure, and the residue was purified by silica-gel flash column chromatography to obtain the desired product **7e** (85.24 mg, 73 % yield, 58% overall yield) as a pale yellow oil.

$R_f = 0.2$  (hexane/EtOAc = 3:1);  $^1\text{H NMR}$  (400 MHz,  $\text{CDCl}_3$ )  $\delta$  8.15 (s, 1H), 7.15–7.05 (m, 5H), 6.99 (d,  $J = 8.6$  Hz, 2H), 6.80 (d,  $J = 8.2$  Hz, 2H), 5.47 (m, 1H), 5.37 (m, 2H), 4.30 (dd,  $J = 11.9, 2.2$  Hz, 1H), 4.13 (m, 1H), 3.80 (s, 3H), 3.75 (m, 2H), 3.72 (m, 1H), 3.39 (m, 4H), 3.11 (m, 1H), 2.80 (m, 1H), 2.59 (m, 3H), 2.33 (m, 1H), 2.01 (m, 1H), 1.88 (m, 1H), 1.77 (m, 2H), 1.50 (m, 1H), 0.92 (m, 21H);  $^{13}\text{C NMR}$  (100 MHz,  $\text{CDCl}_3$ )  $\delta$  167.4, 165.0, 158.0, 155.4, 140.2, 132.1, 131.6, 129.8, 128.8, 128.3, 128.2, 126.8, 113.9, 106.1, 64.5, 60.9, 59.2, 59.1, 57.6, 55.3, 46.9, 43.8, 29.2, 26.3, 23.8, 18.0, 11.9; IR (neat)  $\nu_{\text{max}}$ : 3245, 3000, 2942, 2865, 1572, 1512, 1247, 1113  $\text{cm}^{-1}$ ; HRMS(ESI+): Calcd for  $\text{C}_{39}\text{H}_{58}\text{N}_5\text{O}_2\text{Si}^+$   $[\text{M}+\text{H}]^+$  656.4354, found 656.4345, S100

$\Delta$ ppm –1.37. The stereochemistry of **7e** was confirmed by NOE spectroscopy. 1D-NOE result supported the stereochemistry as shown in Supplementary Fig. 41.

### Synthetic procedure for the preparation of **8e**

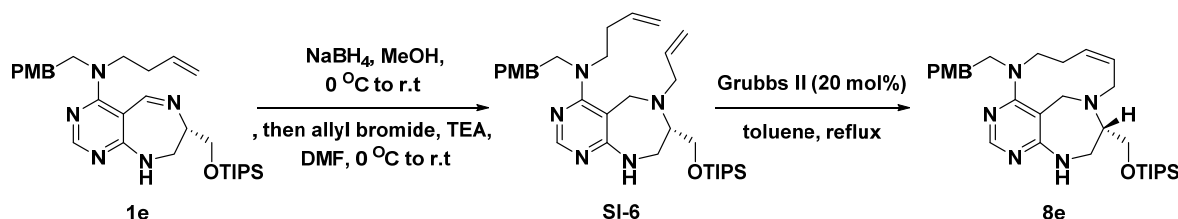

**Compound 8e.** To a stirring solution of **1e** (120 mg, 0.223 mmol) in MeOH (2.2 ml) was added NaBH<sub>4</sub> (42.18 mg, 1.115 mmol) at 0 °C and the resulting mixture was warmed to r.t. After the starting material was consumed as indicated by TLC, the resultant was quenched with saturated NaHCO<sub>3</sub>(aq) and extracted twice with DCM. The combined organic layer was dried over anhydrous Na<sub>2</sub>SO<sub>4</sub>(s) and filtered. The solvent was evaporated under vacuum, and then the crude resultant was dissolved in DMF (2.2 ml). To this solution were sequentially added Et<sub>3</sub>N (0.062 ml, 0.446 mmol) and allyl bromide (0.025 ml, 0.290 mmol) at 0 °C. The reaction was allowed to slowly warm to r.t. After completion of the reaction indicated by TLC, the resultant was quenched with saturated NH<sub>4</sub>Cl(aq) and extracted twice with ethyl acetate. The combined organic layer was dried over anhydrous Na<sub>2</sub>SO<sub>4</sub>(s) and filtered. The filtrate was condensed under reduced pressure, followed by silica-gel flash column chromatography to afford **SI-6** (81.47 mg, 63% yield). To a solution of **SI-6** (81.47 mg, 0.140 mmol) in toluene (28.0 ml) was added second generation Grubbs' catalyst (23.77 mg, 0.028 mmol, 20 mol%) and the mixture was left to stir at reflux. After completion of the reaction as indicated by TLC, solvent was removed under reduced pressure and the residue was purified by silica-gel flash column chromatography to obtain the desired product **8e** (54.08 mg, 70% yield, 44% overall yield) as a yellow oil.

$R_f$  = 0.3 (DCM/MeOH = 20:1); <sup>1</sup>H NMR (400 MHz, CDCl<sub>3</sub>)  $\delta$  8.35 (s, 1H), 7.02 (d,  $J$  = 8.6 Hz, 2H), 6.79 (d,  $J$  = 8.2 Hz, 2H), 5.74 (br d,  $J$  = 5.1 Hz, 1H), 5.67 (td,  $J$  = 11.2, 4.5 Hz, 1H), 5.51 (td,  $J$  = 10.9, 4.5 Hz, 1H), 4.58 (d,  $J$  = 16.0 Hz, 1H), 4.06 (ddd,  $J$  = 14.6, 10.9, 3.1 Hz,

1H), 3.97 (d,  $J = 16.0$  Hz, 1H), 3.76 (s, 3H), 3.59 (dd,  $J = 10.0, 4.1$  Hz, 1H), 3.46 (m, 2H), 3.37 (m, 2H), 3.08 (m, 2H), 2.92 (m, 2H), 2.73 (m, 1H), 2.54 (m, 1H), 2.39 (ddd,  $J = 13.4, 10.7, 5.7$ , 1H), 2.18 (m, 1H), 1.76 (br d,  $J = 12.1$  Hz, 1H), 1.07 (m, 21H);  $^{13}\text{C}$  NMR (100 MHz,  $\text{CDCl}_3$ )  $\delta$  168.2, 165.8, 157.9, 157.7, 134.3, 132.0, 129.5, 127.4, 113.7, 113.3, 69.4, 64.7, 58.1, 55.3, 52.0, 50.5, 43.9, 40.5, 33.8, 25.9, 18.0, 11.9; IR (neat)  $\nu_{\text{max}}$ : 3239, 3006, 2945, 2866, 1574, 1512, 1265  $\text{cm}^{-1}$ ; HRMS(ESI+): Calcd for  $\text{C}_{31}\text{H}_{50}\text{N}_5\text{O}_2\text{Si}^+$   $[\text{M}+\text{H}]^+$  552.3728, found 552.3722,  $\Delta\text{ppm} -1.09$ .

### General procedure for the preparation of **9f** and **10f**

To a microwave vessel tightly sealed with a cap, were added **1f** (90.00 mg, 0.198 mmol), alkyne (0.5 mmol), 4-picoline *N*-oxide (54.57 mg, 0.5 mmol) and  $\text{Rh}(\text{PPh}_3)_3\text{Cl}$  (18.50 mg, 0.020 mmol, 10 mol%) in ACN (3.0 ml). The resulting mixture was heated under microwave irradiation (100 watt) at 90 °C for 35 min. The reaction mixture was diluted with DCM, washed with brine, dried over anhydrous  $\text{Na}_2\text{SO}_4(\text{s})$ , filtered, and concentrated *in vacuo*. The residue was purified by silica-gel flash column chromatography to obtain the desired  $\beta$ -lactam product.

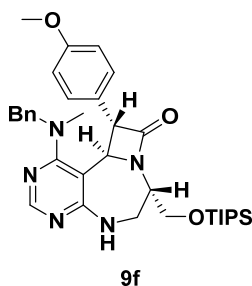

**Compound 9f.** A pale yellow oil;  $R_f = 0.3$  (DCM/MeOH = 20:1); 72.69 mg, 61% yield; d.r. >99:1;  $^1\text{H}$  NMR (400 MHz,  $\text{CDCl}_3$ )  $\delta$  8.10 (s, 1H), 7.25 (m, 3H), 7.11 (d,  $J = 8.2$  Hz, 4H), 6.83 (d,  $J = 8.2$  Hz, 2H), 6.30 (dd,  $J = 6.5, 4.5$  Hz, 1H), 5.06 (s, 1H), 4.43, 4.31 (ABq,  $J_{\text{AB}} = 14.9$  Hz, 2H), 4.21 (dd,  $J = 10.2, 3.5$  Hz, 1H), 4.12 (m, 1H), 3.87 (m, 2H), 3.81 (s, 3H), 3.56 (s, 1H), 3.43 (ddd,  $J = 14.2, 7.3, 4.3$  Hz, 1H), 2.44 (s, 3H), 1.09 (m, 21H);  $^{13}\text{C}$  NMR (100 MHz,  $\text{CDCl}_3$ )  $\delta$  168.0, 165.3, 163.0, 159.2, 155.0, 137.5, 129.0, 128.5, 128.4, 127.3, 127.1, 114.1, 96.9, 65.2,

63.5, 59.5, 55.3, 55.2, 54.2, 42.9, 38.1, 18.0, 11.8; IR (neat)  $\nu_{\text{max}}$ : 3250, 3056, 2942, 2865, 1751, 1567, 1119  $\text{cm}^{-1}$ ; HRMS(ESI+): Calcd for  $\text{C}_{34}\text{H}_{48}\text{N}_5\text{O}_3\text{Si}^+$   $[\text{M}+\text{H}]^+$  602.3521, found 602.3528,  $\Delta\text{ppm} +1.16$ . The diastereomeric ratio was determined by LC-MS analysis of crude reaction mixture (Supplementary Fig. 10). The stereochemistry of this product was confirmed by NOE spectroscopy. 1D-NOE result supported the stereochemistry as shown in Supplementary Fig. 44.

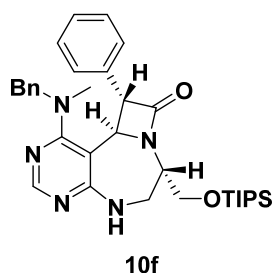

**Compound 10f.** A yellow solid;  $R_f = 0.3$  (DCM/MeOH = 20:1); 54.35 mg, 48% yield; d.r. 90:10;  $^1\text{H}$  NMR (400 MHz,  $\text{CDCl}_3$ )  $\delta$  8.12 (s, 1H), 7.70–7.65 (m, 1H), 7.53 (m, 1H), 7.46 (m, 1H), 7.30 (m, 2H), 7.23 (m, 3H), 7.09 (m, 2H), 6.35 (dd,  $J = 6.7, 4.7$  Hz, 1H), 5.11 (d,  $J = 1.2$  Hz, 1H), 4.39 (m, 1H), 4.23 (m, 2H), 4.13 (m, 1H), 3.87 (m, 2H), 3.60 (d,  $J = 1.5$  Hz, 1H), 3.43 (ddd,  $J = 14.4, 7.3, 4.5$  Hz, 1H), 2.42 (s, 3H), 1.10 (m, 21H);  $^{13}\text{C}$  NMR (100 MHz,  $\text{CDCl}_3$ )  $\delta$  167.6, 165.4, 163.0, 155.0, 137.4, 135.0, 132.1, 132.0, 128.7, 128.4, 127.8, 127.2, 96.9, 65.9, 63.5, 59.4, 55.2, 54.3, 42.8, 37.9, 18.0, 11.8; IR (neat)  $\nu_{\text{max}}$ : 3239, 3059, 3030, 2942, 2866, 1755, 1567, 1108  $\text{cm}^{-1}$ ; HRMS(ESI+): Calcd for  $\text{C}_{33}\text{H}_{46}\text{N}_5\text{O}_2\text{Si}^+$   $[\text{M}+\text{H}]^+$  572.3415, found 572.3413,  $\Delta\text{ppm} -0.35$ ; mp: 86–88  $^\circ\text{C}$ . The diastereomeric ratio was determined by LC-MS analysis of crude reaction mixture (Supplementary Fig. 11). The stereochemistry of this product was confirmed by NOE spectroscopy. 1D-NOE result supported the stereochemistry as shown Supplementary Fig. 46.

## Synthetic procedure for the preparation of 11f

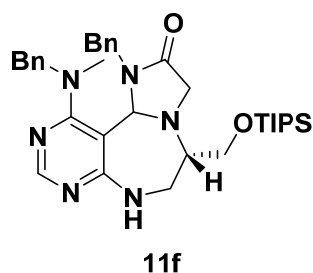

**Compound 11f.** To a microwave vessel tightly sealed with a cap, were added **1f** (90mg, 0.198 mmol), *N*-benzyl-2-chloroacetamide (54.54 mg, 0.297 mmol) and NaBr (30.56 mg, 0.297 mmol) in DMF (3.0 ml). The resulting mixture was heated under microwave irradiation (150 watt) at 110 °C for 30 min. The reaction mixture was cooled to r.t. 1,8-Diazabicyclo[5.4.0]undec-7-ene (DBU, 0.059 ml, 0.396 mmol) was added and left to stir at r.t. After completion of the reaction as indicated by TLC, the reaction mixture was diluted with ethyl acetate, washed with saturated NaHCO<sub>3</sub>(aq), dried over anhydrous Na<sub>2</sub>SO<sub>4</sub>(s), filtered, and concentrated *in vacuo*. The residue was purified by HPLC to obtain desired product **11f** (72.57 mg, 61%, d.r. 6:1) as a pale yellow oil. The diastereomeric ratio was determined by <sup>1</sup>H NMR spectroscopy (Supplementary Fig. 47).

$R_f = 0.3$  (hexane/EtOAc = 1:1); <sup>1</sup>H NMR (400 MHz, CDCl<sub>3</sub>) δ 8.17 (s, 0.83H, *major diastereomer*), 8.12 (s, 0.13H, *minor diastereomer*), 7.28 (br s, 3H), 7.19 (br s, 3H), 6.89 (br s, 2H), 6.73 (br s, 2H), 6.11 (br s, 0.12H, *minor diastereomer*), 5.90 (s, 0.78H, *major diastereomer*), 5.28 (s, 0.84H, *major diastereomer*), 5.08 (s, 0.13H, *minor diastereomer*), 4.98 (m, 1H), 4.44, 4.34 (ABq,  $J_{AB} = 16.2$  Hz, 2H), 3.78 (m, 2H), 3.66–3.37 (m, 4H), 3.24 (m, 2H), 2.73 (m, 3H), 1.05–0.95 (m, 21H); <sup>13</sup>C NMR (100 MHz, CDCl<sub>3</sub>) δ 173.3, 167.1, 162.9, 157.3, 137.4, 136.0, 128.6, 128.5, 127.8, 127.1, 126.9, 126.7, 88.1, 77.3, 65.0, 59.6, 57.8, 52.0, 44.1, 42.9, 37.9, 18.03, 18.02, 11.9; IR (neat)  $\nu_{max}$ : 3290, 3030, 2943, 2865, 1694, 1629, 1571, 1118 cm<sup>-1</sup>; HRMS(ESI<sup>+</sup>): Calcd for C<sub>34</sub>H<sub>49</sub>N<sub>6</sub>O<sub>2</sub>Si<sup>+</sup> [M+H]<sup>+</sup> 601.3681, found 601.3693, Δppm +2.00.



## Synthetic procedure for the preparation of **12f** and **12f'**

To a stirring solution of **1f** (180.0 mg, 0.397 mmol) in ACN (20 ml), benzyl bromide (0.071 ml, 0.596 mmol) was added and the resulting mixture was stirred at 80 °C. After the starting material was consumed as indicated by TLC, the organic solvent was removed under reduced pressure to afford the crude iminium ion. After washing with hexane to remove any excess benzyl bromide, ethynylmagnesium bromide (0.5 M solution in THF, 3.970 ml, 1.985 mmol) was added dropwise to a cooled solution of resultant iminium ion in dry THF (40 ml) over 30 min at -78 °C. The reaction was allowed to slowly warm to r.t over an 18 h period. The mixture was quenched with saturated NH<sub>4</sub>Cl(aq) and extracted twice with DCM. The combined organic layer was dried over anhydrous Na<sub>2</sub>SO<sub>4</sub>(s) and the filtrate was condensed under reduced pressure, followed by silica-gel flash column chromatography to afford **12f** (major) and **12f'** (minor).

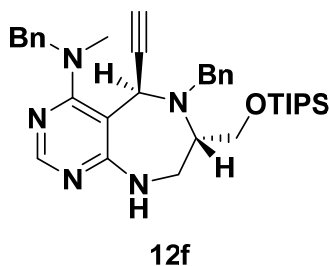

**Compound 12f (major).** A pale yellow oil;  $R_f = 0.4$  (hexane/EtOAc = 3:1); 158.4 mg, 70% yield; <sup>1</sup>H NMR (400 MHz, CDCl<sub>3</sub>) δ 8.16 (s, 1H), 7.33–7.24 (m, 5H), 7.17–7.14 (m, 3H), 6.79–6.78 (m, 2H), 6.27 (m, 1H), 4.74 (d,  $J = 2.3$  Hz, 1H), 4.64 (d,  $J = 14.9$  Hz, 1H), 4.31, 4.26 (ABq,  $J_{AB} = 15.1$  Hz, 2H), 3.92–3.85 (m, 2H), 3.78 (d,  $J = 14.5$  Hz, 1H), 3.73 (dd,  $J = 10.0, 3.3$  Hz, 1H), 3.54 (ddd,  $J = 14.4, 7.6, 1.4$  Hz, 1H), 2.93 (m, 1H), 2.60 (s, 3H), 2.53 (d,  $J = 2.3$  Hz, 1H), 1.10–1.00 (m, 21H); <sup>13</sup>C NMR (100 MHz, CDCl<sub>3</sub>) δ 167.4, 164.2, 155.8, 138.9, 138.3, 128.5, 128.4, 128.3, 127.6, 127.4, 126.7, 102.0, 83.9, 74.9, 65.3, 62.0, 58.5, 58.2, 48.5, 40.2, 39.6, 18.1, 12.0; IR (neat)  $\nu_{max}$ : 3241, 2943, 2865, 1573, 1404, 1101, 669 cm<sup>-1</sup>; HRMS(ESI+) Calcd for C<sub>34</sub>H<sub>48</sub>N<sub>5</sub>OSi<sup>+</sup> [M+H]<sup>+</sup> 570.3623, found 570.3614,  $\Delta$ ppm -1.58. The stereochemistry of this product was confirmed by NOE spectroscopy. 1D-NOE result supported the stereochemistry as shown in Supplementary Fig. 49.

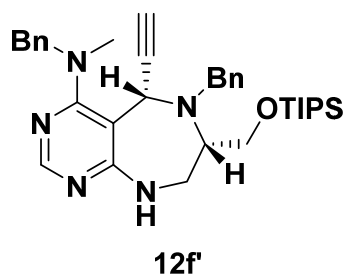

**Compound 12f' (minor).** A pale yellow oil;  $R_f = 0.25$  (hexane/EtOAc = 3:1); 18.78 mg, 8.3% yield;  $^1\text{H NMR}$  (400 MHz,  $\text{CDCl}_3$ )  $\delta$  8.21 (s, 1H), 7.33–7.31 (m, 3H), 7.21–7.17 (m, 5H), 6.84 (m, 2H), 6.34 (m, 1H), 4.79 (m, 1H), 4.71 (d,  $J = 2.3$  Hz, 1H), 4.54, 4.20 (ABq,  $J_{AB} = 15.5$  Hz, 2H), 4.07 (t,  $J = 10.2$  Hz, 1 H), 3.84, 3.71 (ABq,  $J_{AB} = 13.7$  Hz, 2H), 3.64 (dd,  $J = 9.8, 5.1$  Hz, 1H), 3.57 (ddd,  $J = 15.0, 7.7, 4.7$  Hz 1H), 3.37 (m, 1H), 2.68 (s, 3H), 2.50 (d,  $J = 2.7$  Hz, 1H), 1.04 (br s, 21H);  $^{13}\text{C NMR}$  (100 MHz,  $\text{CDCl}_3$ )  $\delta$  168.7, 164.4, 156.1, 139.0, 138.2, 129.0, 128.5, 128.4, 127.6, 127.3, 126.8, 99.9, 87.5, 74.8, 68.3, 64.7, 60.7, 58.5, 46.7, 44.0, 38.9, 18.1, 12.0; IR (neat)  $\nu_{\text{max}}$ : 3239, 2940, 2865, 1571, 1404, 1102, 698  $\text{cm}^{-1}$ ; HRMS(ESI<sup>+</sup>): Calcd for  $\text{C}_{34}\text{H}_{48}\text{N}_5\text{OSi}^+$   $[\text{M}+\text{H}]^+$  570.3623, found 570.3625,  $\Delta\text{ppm} +0.35$ . The stereochemistry of this product was confirmed by NOE spectroscopy. 1D-NOE result supported the stereochemistry as shown in Supplementary Fig. 51.

**Synthetic procedure for the preparation of 13f and 13f'.**

#### Compound SI-7

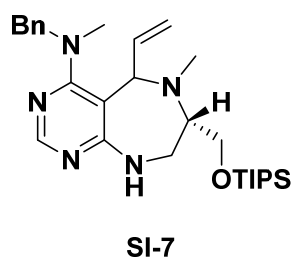

To a stirring solution of **1f** (90 mg, 0.198 mmol) in ACN (10.0 ml), iodomethane (0.018 ml, 0.297 mmol) was added and the resulting mixture was stirred at 40 °C. After the starting

material was consumed as indicated by TLC, the organic solvent and any excess iodomethane were removed under reduced pressure to afford the crude iminium ion. To a cooled solution of resultant iminium ion in dry THF (20.0 ml) was added vinylmagnesium bromide (1.0 M solution in THF, 0.990 ml, 0.990 mmol) dropwise over 30 min at  $-78\text{ }^{\circ}\text{C}$ . The reaction was allowed to slowly warm to r.t over an 18 h period. The mixture was quenched with saturated  $\text{NH}_4\text{Cl}(\text{aq})$  and extracted twice with DCM. The combined organic layer was dried over anhydrous  $\text{Na}_2\text{SO}_4(\text{s})$  and the filtrate was condensed under reduced pressure, followed by silica-gel flash column chromatography to afford **SI-7** (70.68 mg, 72% yield, d.r. 9:1) as a yellow oil (Supplementary Fig. 4). The diastereomeric ratio was determined by  $^1\text{H}$  NMR spectroscopy (Supplementary Fig. 52).

$R_f = 0.27$  (DCM/MeOH = 20:1);  $^1\text{H}$  NMR (400 MHz,  $\text{CDCl}_3$ )  $\delta$  8.22 (s, 0.08 H, *minor diastereomer*), 8.17 (s, 0.71H, *major diastereomer*), 7.36–7.24 (m, 6H, *major diastereomer+minor diastereomer*), 6.25 (m, 1H), 5.64 (br s, 0.12H, *minor diastereomer*), 5.29 (br s, 0.97H, *major diastereomer*), 5.20 (d,  $J = 10.2$  Hz, 1H), 4.88 (d,  $J = 17.2$  Hz, 1H), 4.56–4.45 (m, 3H), 5.20 (d,  $J = 10.2$  Hz, 1H), 3.84–3.77 (m, 2H), 3.55 (t,  $J = 9.4$  Hz, 1.11H, *major diastereomer*), 3.43 (t,  $J = 9.8$  Hz, 0.15 H, *minor diastereomer*), 3.19 (m, 1H), 2.86–2.81 (m, 4H), 2.74 (s, 0.38H, *minor diastereomer*), 2.42 (s, 0.38H, *minor diastereomer*), 2.27 (s, 3H, *major diastereomer*), 1.10–1.02 (m, 25H, *major diastereomer+minor diastereomer*);  $^{13}\text{C}$  NMR (100 MHz,  $\text{CDCl}_3$ )  $\delta$  167.6, 165.5, 155.4, 138.7, 136.5, 128.6, 127.3, 127.1, 118.2, 102.9, 64.9, 63.6, 62.8, 58.3, 44.2, 41.4, 39.4, 18.1, 12.0; HRMS(ESI<sup>+</sup>): Calcd for  $\text{C}_{28}\text{H}_{46}\text{N}_5\text{OSi}^+$   $[\text{M}+\text{H}]^+$  496.3466, found 496.3465,  $\Delta\text{ppm} -0.20$ .

### Compound 13f

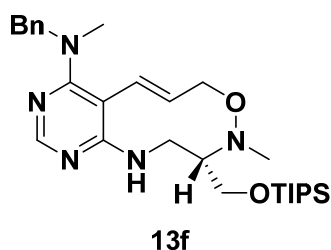

To a solution of **SI-7** (70.68 mg, 0.143 mmol) in DCM (14.3 ml) was added 3-chloroperbenzoic acid (*m*-CPBA, 32.08 mg, 0.186 mmol) and the mixture was left to stir at reflux. After 1h,

solvent was removed under reduced pressure and the residue was purified by silica-gel flash column chromatography to obtain the desired product **13f** (42.45 mg, 58% yield, 42% overall yield) as a colorless oil (Supplementary Fig. 4).

$R_f = 0.3$  (hexane/EtOAc = 3:1);  $^1\text{H NMR}$  (500 MHz,  $\text{CDCl}_3$ )  $\delta$  8.11 (s, 1H), 7.32 (m, 2H), 7.24 (m, 1H), 7.20 (m, 2H), 6.63 (d,  $J = 16.1$  Hz, 1H), 6.09 (m, 1H), 4.82 (br s, 3H), 4.09 (m, 3H), 3.71 (m, 2H), 3.45–3.27 (m, 1H), 3.04 (s, 3H), 2.77 (m, 1H), 2.63–2.55 (m, 3H), 1.08 (m, 21H); IR (neat)  $\nu_{\text{max}}$ : 3395, 3254, 3060, 3028, 2926, 1946, 1713, 1567, 1493, 1452, 1266, 1105  $\text{cm}^{-1}$ ; HRMS(ESI+): Calcd for  $\text{C}_{28}\text{H}_{46}\text{N}_5\text{O}_2\text{Si}^+$   $[\text{M}+\text{H}]^+$  512.3415, found 512.3417,  $\Delta$  ppm +0.39. The  $^1\text{H NMR}$  spectrum of **13f** was too broad to analyze. As shown below, the structure of **13f** was fully confirmed only after treatment of 3-chlorobenzoic acid as a salt product, **13f'**, when broad peak of **13f** converted to sharp and well-resolved NMR signals.

### Compound **13f'**

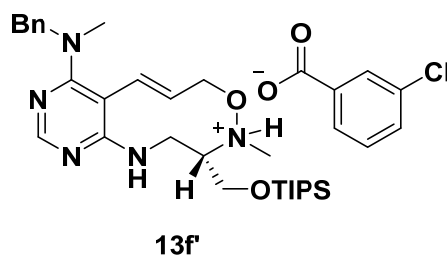

To a solution of **SI-7** (70.68 mg, 0.143 mmol) in DCM (14.3 ml) was added 3-chloroperbenzoic acid (*m*-CPBA, 32.08 mg, 0.186 mmol) and the mixture was left to stir at reflux. After 1 h, 3-chlorobenzoic acid (22.39mg, 0.143 mmol) was added and left to stir at r.t. After completion of the reaction as indicated by TLC, solvent was removed under reduced pressure and the residue was purified by silica-gel flash column chromatography to obtain the desired product **13f'** (70.72mg, 74% yield, 53% overall yield) as a pale yellow oil (Supplementary Fig. 4). The *E/Z* ratio (99:1) was determined by LC-MS analysis of the crude reaction mixtures (Supplementary Fig. 12).

$R_f = 0.3$  (hexane/EtOAc 1:1);  $^1\text{H NMR}$  (500 MHz,  $\text{CDCl}_3$ )  $\delta$  8.19 (s, 1H), 7.95 (s, 1H, 3-chlorobenzoic acid-H), 7.85 (d,  $J = 7.8$  Hz, 1H, 3-chlorobenzoic acid-H), 7.54 (d,  $J = 8.3$  Hz,

1H, 3-chlorobenzoic acid-H), 7.37 (t,  $J = 7.8$  Hz, 1H, 3-chlorobenzoic acid-H), 7.29–7.26 (m, 2H), 7.22–7.19 (m, 3H), 6.49 (d,  $J = 16.6$  Hz, 1H), 5.96 (dt,  $J = 16.6, 5.9$  Hz, 1H), 5.51 (t,  $J = 6.4$  Hz, 1H), 4.74 (m, 2H), 4.66, 4.62 (ABq,  $J_{AB} = 15.0$  Hz, 2H), 3.96 (m, 2H), 3.70 (dd,  $J = 9.8, 8.3$  Hz, 1H), 3.55 (dt,  $J = 14.3, 5.6$  Hz, 1H), 2.90 (s, 3H), 2.76 (m, 1H), 2.67 (s, 3H), 1.06 (m, 21H),  $^{13}\text{C}$  NMR (100 MHz,  $\text{CDCl}_3$ )  $\delta$  165.1, 162.8, 161.2, 155.4, 138.4, 134.7, 133.3, 131.7, 129.84, 129.75, 128.9, 128.6, 127.8, 127.79, 127.2, 127.1, 96.3, 70.2, 65.6, 61.0, 56.0, 45.2, 40.5, 39.1, 18.1, 11.9; IR (neat)  $\nu_{\text{max}}$ : 3396, 3062, 3026, 2945, 2863, 1724, 1572, 1253, 1117  $\text{cm}^{-1}$ ; HRMS(ESI<sup>+</sup>): Calcd for  $\text{C}_{35}\text{H}_{51}\text{ClN}_5\text{O}_4\text{Si}^+$   $[\text{M}+\text{H}]^+$  668.3393, found 668.3387,  $\Delta\text{ppm} - 0.90$ .

### Synthetic procedure for the preparation of **14f**

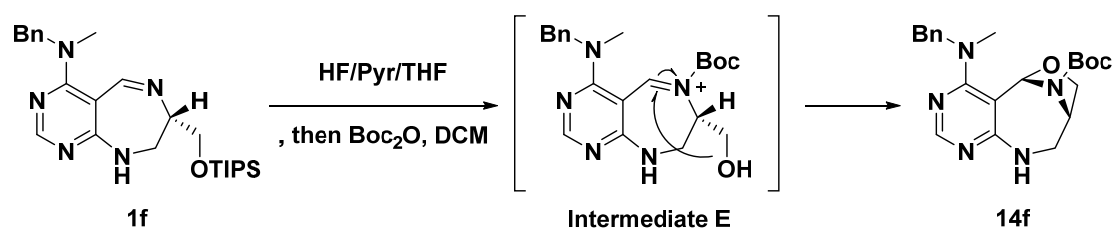

**Compound 14f.** **1f** (90.00 mg, 0.198 mmol) was treated with HF/pyridine/THF (5/5/90) solution (2 ml) and then, the mixture was stirred at r.t. After the starting material was consumed as indicated by TLC, ethoxytrimethylsilane (2 ml) was added and allowed to react for 1 h to quench any excess HF (HF/pyridine protocol). The reaction mixture was condensed *in vacuo* to afford the crude product. To a solution of crude product in DCM (4 ml) was added  $\text{Boc}_2\text{O}$  (56.09 mg, 0.257 mmol) and then, the mixture was stirred at r.t. After completion of the reaction as indicated by TLC, solvent was removed under reduced pressure and the residue was purified through the recrystallization in hexane to obtain desired product **14f** (68.47 mg, 87% overall yield) as a white solid.

$R_f = 0.3$  (EA);  $^1\text{H}$  NMR (400 MHz,  $\text{CDCl}_3$ )  $\delta$  8.13 (s, 1H), 7.35–7.24 (m, 5H), 6.62 (s, 1H), 5.63 (br s, 1H), 4.76 (m, 2H), 4.55 (d,  $J = 15.3$  Hz, 1H), 4.01 (d,  $J = 7.0$  Hz, 1H), 3.87 (t,  $J = 6.7$  Hz, 1H), 3.55 (br d,  $J = 13.6$  Hz, 1H), 3.48–3.43 (m, 1H), 2.98 (s, 3H), 1.43 (s, 9H);  $^{13}\text{C}$  NMR (100 MHz,  $\text{CDCl}_3$ )  $\delta$  166.7, 164.0, 155.8, 153.0, 138.3, 128.6, 127.9, 127.2, 103.0, 85.2,

81.6, 68.5, 57.5, 53.7, 48.0, 40.7, 28.5, 28.4, 28.3; IR (neat)  $\nu_{\max}$ : 3248, 2975, 2931, 1700, 1571, 1403, 1162, 1048, 699  $\text{cm}^{-1}$ ; HRMS(ESI+): Calcd for  $\text{C}_{21}\text{H}_{28}\text{N}_5\text{O}_3^+$   $[\text{M}+\text{H}]^+$  398.2187, found 398.2174,  $\Delta\text{ppm}$  -3.26; mp: 50–52  $^{\circ}\text{C}$ .

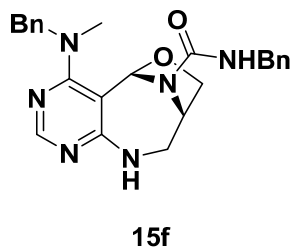

**Compound 15f.** A white solid;  $R_f$  = 0.4 (EA); 77.57 mg, 91% yield;  $^1\text{H}$  NMR (500 MHz,  $\text{CDCl}_3$ )  $\delta$  8.18 (s, 1H), 7.29–7.28 (m, 2H), 7.25–7.24 (m, 4H), 7.19–7.18 (m, 2H), 7.14 (d,  $J$  = 6.4 Hz, 2H), 6.57 (s, 1H), 5.55 (br s, 1H), 4.86 (t,  $J$  = 5.4 Hz, 1 H), 4.74 (m, 1H), 4.46 (br d,  $J$  = 1.5 Hz, 2H), 4.32 (d,  $J$  = 5.4 Hz, 2H), 4.02 (dd,  $J$  = 7.3, 1.0 Hz, 1H), 3.91 (m, 1H), 3.55 (m, 1H), 3.38 (dt,  $J$  = 13.2, 4.2 Hz, 1H), 2.83 (s, 3H);  $^{13}\text{C}$  NMR (100 MHz,  $\text{CDCl}_3$ )  $\delta$  166.8, 164.1, 156.0, 154.9, 138.8, 137.8, 128.7, 128.6, 127.7, 127.5, 127.4, 127.3, 104.3, 84.0, 68.7, 58.2, 53.7, 48.0, 44.7, 40.3; IR (neat)  $\nu_{\max}$ : 3258, 2971, 1633, 1542, 1405, 1049, 698  $\text{cm}^{-1}$ ; HRMS(ESI+): Calcd for  $\text{C}_{24}\text{H}_{27}\text{N}_6\text{O}_2^+$   $[\text{M}+\text{H}]^+$  431.2190, found 431.2184,  $\Delta\text{ppm}$  -1.39; mp: 67–69  $^{\circ}\text{C}$ . The product was synthesized according to the synthetic procedure for the preparation of **14f** from **1f** and benzyl isocyanate (1.3 equiv.).

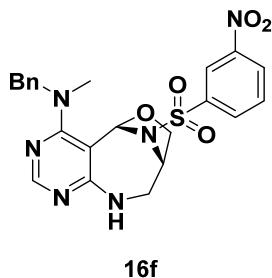

**Compound 16f.** A white solid;  $R_f$  = 0.3 (EA); 59.2 mg, 62% yield;  $^1\text{H}$  NMR (400 MHz,  $\text{DMSO}-d_6$ )  $\delta$  8.54–8.53 (m, 2H), 8.02 (s, 1H), 7.98 (d,  $J$  = 7.8 Hz, 1H), 7.83 (t,  $J$  = 8.2 Hz, 1H),

7.39 (m, 2H), 7.26 (m, 4H), 6.63 (s, 1H), 4.84 (br s, 1H), 4.65, 4.54 (ABq,  $J_{AB} = 15.6$  Hz, 2H), 3.61 (d,  $J = 7.4$  Hz, 1H), 3.51–3.45 (m, 1H), 3.28 (d,  $J = 14.1$  Hz, 1H), 2.88 (m, 4H);  $^{13}\text{C}$  NMR (400 MHz, DMSO- $d_6$ )  $\delta$  165.6, 163.2, 155.8, 148.0, 138.9, 138.1, 133.3, 131.7, 128.5, 127.4, 127.1, 122.4, 122.3, 101.4, 87.3, 66.7, 57.4, 55.8, 54.9, 47.8, 40.0; IR (neat)  $\nu_{\text{max}}$ : 2920, 1573, 1535, 1354, 1176, 734  $\text{cm}^{-1}$ ; HRMS(ESI+): Calcd for  $\text{C}_{22}\text{H}_{23}\text{N}_6\text{O}_5\text{S}^+$   $[\text{M}+\text{H}]^+$  483.1445, found 483.1450,  $\Delta$ ppm +1.03; mp: 101–103 °C. The product was synthesized according to the synthetic procedure for the preparation of **14f** from **1f** and 3-nitrobenzene sulfonyl chloride (*m*-NsCl) (1.3 equiv.). Purified by silica-gel flash column chromatography to afford **16f**. The structure of **16f** was confirmed by X-ray crystallographic analysis (Supplementary Fig. 5, Supplementary Table 1–5, CCDC number 1500586).

### Synthetic procedure for the preparation of **17f'**.

#### Compound SI-8.

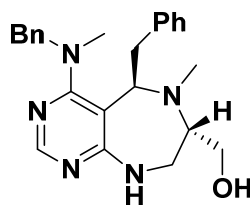

SI-8

To a stirring solution of **1f** (180 mg, 0.397 mmol) in ACN (20.0 ml), iodomethane (0.036 ml, 0.594 mmol) was added and the resulting mixture was stirred at 40 °C. After the starting material was consumed as indicated by TLC, the organic solvent and any excess iodomethane were removed under reduced pressure to afford the crude iminium ion. To a cooled solution of resultant iminium ion in dry THF (40.0 ml) was added benzylmagnesium bromide (2.0 M solution in THF, 0.99 ml, 1.98 mmol) dropwise over 30 min at  $-78$  °C. The reaction was allowed to slowly warm to r.t over an 18 h period. The mixture was quenched with saturated  $\text{NH}_4\text{Cl}(\text{aq})$  and extracted twice with DCM. The combined organic layer was dried over anhydrous  $\text{Na}_2\text{SO}_4(\text{s})$  and the filtrate was condensed under reduced pressure, followed by

filtration through a short pad of silica gel with hexane/EtOAc (1:1) to afford crude product. To a solution of crude product in THF (4 ml) was added TBAF (1.0 M solution in THF, 0.516 ml, 0.516 mmol). The reaction mixture was then left to stir at r.t. After completion of the reaction as indicated by TLC, the solvent was removed under reduced pressure and the residue was purified through the silica-gel flash column chromatography to obtain product **SI-8** (121.8 mg, 76% yield) as a white solid (Supplementary Fig. 6).

$R_f = 0.4$  (DCM/MeOH = 10:1);  $^1\text{H NMR}$  (400 MHz,  $\text{CDCl}_3$ )  $\delta$  8.13 (s, 1H), 7.32–7.25 (m, 3H), 7.20–7.13 (m, 3H), 6.99 (d,  $J = 7.2$  Hz, 2H), 6.73 (d,  $J = 6.7$  Hz, 2H), 5.40 (d,  $J = 5.9$  Hz, 1H), 4.35, 4.28 (ABq,  $J_{AB} = 16.0, 15.6$  Hz, 2H), 4.19 (dd,  $J = 9.6, 4.5$  Hz, 1H), 3.60 (dd,  $J = 10.6, 5.1$  Hz, 1H), 3.46 (dd,  $J = 10.8, 5.7$  Hz, 1H), 3.31–3.04 (m, 4H), 2.88 (dd,  $J = 12.9, 4.3$  Hz, 1H), 2.62 (s, 3H), 2.51 (br s, 1H), 2.32 (s, 3H);  $^{13}\text{C NMR}$  (100 MHz,  $\text{CDCl}_3$ )  $\delta$  168.4, 166.1, 154.9, 139.3, 138.1, 129.0, 128.6, 128.1, 127.4, 127.1, 126.2, 103.3, 65.0, 61.7, 58.5, 58.0, 46.2, 38.7, 38.6, 34.5; HRMS (ESI+): Calcd for  $\text{C}_{24}\text{H}_{30}\text{N}_5\text{O}^+$   $[\text{M}+\text{H}]^+$  404.2445, found 404.2446,  $\Delta\text{ppm} +0.25$ ; mp: 70–72 °C.

**Compound 17f and 17f'**. To a stirring solution of **SI-8** (121.8 mg, 0.302 mmol) in toluene (3.0 ml) under argon atmosphere were sequentially added  $\text{Et}_3\text{N}$  (0.126 ml, 0.906 mmol) and trifluoromethanesulfonic anhydride ( $\text{Tf}_2\text{O}$ ) (0.112 ml, 0.664 mmol) at  $-40$  °C and left to stir. After 1 h, the temperature of the reaction mixture was brought down to  $-78$  °C and  $\text{NaN}_3$  (58.9 mg, 0.906 mmol) was added. The reaction was allowed to slowly warm to r.t over an 18 h period. The resultant was quenched with saturated  $\text{NaHCO}_3(\text{aq})$  and extracted twice with DCM. The combined organic layer was dried over anhydrous  $\text{Na}_2\text{SO}_4(\text{s})$  and the filtrate was condensed under reduced pressure, followed by silica-gel flash column chromatography to afford the **17f** (Path A, eight-membered ring) and **17f'** (Path B, seven-membered ring) as shown in Supplementary Fig. 6.



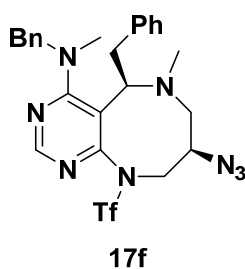

**Compound 17f** (Path A, eight-membered ring, Supplementary Fig. 6). A white solid;  $R_f = 0.6$  (hexane/EtOAc = 3:1); 37.2 mg, 22% yield, 17% overall yield;  $^1\text{H NMR}$  (800 MHz,  $\text{CDCl}_3$ )  $\delta$  8.29 (s, 1H), 7.32 (m, 2H), 7.28 (m, 1H), 7.17 (m, 2H), 7.13 (m, 1H), 7.00 (d,  $J = 7.3$  Hz, 2H), 6.74 (d,  $J = 7.3$  Hz, 2H), 4.33, 4.27 (ABq,  $J_{AB} = 15.7$  Hz, 2H), 4.23 (dd,  $J = 14.9, 6.6$  Hz, 1H), 3.99 (dd,  $J = 10.3, 3.9$  Hz, 1H), 3.96 (dd,  $J = 15.7, 1.5$  Hz, 1H), 3.89 (m, 1H), 3.38 (dd,  $J = 14.9, 10.5$  Hz, 1H), 3.07 (m, 1H), 2.98 (dd,  $J = 12.5, 3.7$  Hz, 1H), 2.84 (br dd,  $J = 16.0, 1.6$  Hz, 1H), 2.66 (s, 3H), 2.59 (s, 3H);  $^{13}\text{C NMR}$  (100 MHz,  $\text{CDCl}_3$ )  $\delta$  169.2, 160.3, 154.0, 138.1, 136.7, 129.1, 128.8, 128.3, 127.64, 127.57, 126.5, 120.7 (q,  $^1J_{C,F} = 324.4$  Hz), 115.0, 66.0, 59.9, 57.4, 56.0, 52.1, 49.1, 38.8, 37.5; IR (neat)  $\nu_{\text{max}}$ : 3028, 2929, 2868, 2108, 1566, 1393  $\text{cm}^{-1}$ ; HRMS(ESI+) Calcd for  $\text{C}_{25}\text{H}_{28}\text{F}_3\text{N}_8\text{O}_2\text{S}^+$   $[\text{M}+\text{H}]^+$  561.2003, found 561.2009,  $\Delta\text{ppm} +1.07$ ; mp: 103–105  $^\circ\text{C}$ . The stereochemistry of this product was confirmed by NOE spectroscopy. 1D-NOE result supported the stereochemistry as shown in Supplementary Fig. 60.

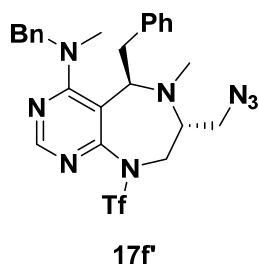

**Compound 17f'** (Path B, seven-membered ring, Supplementary Fig. 6). A white solid;  $R_f = 0.5$  (hexane/EtOAc = 3:1); 55.9 mg, 33% yield, 25% overall yield;  $^1\text{H NMR}$  (500 MHz,  $\text{CDCl}_3$ )  $\delta$  8.32 (s, 1H), 7.34 (m, 2H), 7.29 (m, 1H), 7.14 (m, 3H), 6.96 (d,  $J = 7.3$  Hz, 2H), 6.73 (br d,  $J = 7.3$  Hz, 2H), 4.56, 4.49 (ABq,  $J_{AB} = 16.5$  Hz, 2H), 4.23 (d,  $J = 15.2$  Hz, 1 H), 3.91 (dd,  $J =$

11.2, 2.9 Hz, 1H), 3.67 (dd,  $J = 13.7, 4.4$  Hz, 1H), 3.50 (dd,  $J = 14.9, 10.5$  Hz, 1H), 3.32 (m, 1H), 3.19 (dd,  $J = 13.7, 2.4$  Hz, 1H), 3.10 (t,  $J = 11.8$  Hz, 1H), 2.96 (dd,  $J = 13.0, 3.2$  Hz, 1H), 2.78 (s, 3H), 2.31 (s, 3H);  $^{13}\text{C}$  NMR (100 MHz,  $\text{CDCl}_3$ )  $\delta$  168.1, 159.7, 154.7, 138.3, 137.2, 129.1, 128.8, 128.3, 127.5, 127.0, 126.5, 120.1 ( $q, ^1J_{\text{C,F}} = 322.6$  Hz), 110.1, 66.6, 59.6, 57.4, 56.3, 51.5, 42.1, 38.0, 31.5; IR (neat)  $\nu_{\text{max}}$ : 3030, 2930, 2869, 2105, 1578, 1529, 1391, 1212, 1043  $\text{cm}^{-1}$ ; HRMS(ESI+) Calcd for  $\text{C}_{25}\text{H}_{28}\text{F}_3\text{N}_8\text{O}_2\text{S}^+$   $[\text{M}+\text{H}]^+$  561.2003, found 561.2011,  $\Delta\text{ppm} +1.43$ ; mp: 140–142 °C. The stereochemistry of this product was confirmed by NOE spectroscopy. 1D-NOE result supported the stereochemistry as shown in Supplementary Fig. 62.

### Synthetic procedure for the preparation of 18f

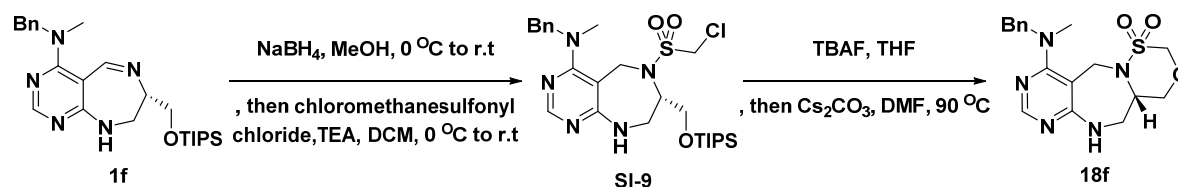

**Compound 18f.** To a stirring solution of **1f** (90mg, 0.198 mmol) in MeOH (2 ml) was added  $\text{NaBH}_4$  (36.88 mg, 0.975 mmol) at 0 °C. The resulting mixture was left to stir and allowed to warm to r.t. After the starting material was consumed as indicated by TLC, the resultant was quenched with saturated  $\text{NaHCO}_3(\text{aq})$  and extracted twice with DCM. The combined organic layer was dried over anhydrous  $\text{Na}_2\text{SO}_4(\text{s})$  and filtered. The solvent was evaporated under reduced pressure, and the resulting crude secondary amine was dissolved in DMF (2 ml). To this solution were sequentially added  $\text{Et}_3\text{N}$  (0.055 ml, 0.396 mmol) and chloromethane sulfonyl chloride (0.023 ml, 0.257 mmol) at 0 °C. The resulting mixture was left to stir and allowed to warm to r.t. After completion of the reaction as indicated by TLC, the resultant was quenched with saturated  $\text{NH}_4\text{Cl}(\text{aq})$  and extracted twice with DCM. The combined organic layer was dried over anhydrous  $\text{Na}_2\text{SO}_4(\text{s})$  and the filtrate was condensed under reduced pressure, followed by silica-gel flash column chromatography to afford **SI-9** (97.89 mg, 87% yield). To a solution of **SI-9** (97.89 mg, 0.172 mmol) in THF (2 ml) was added TBAF (1.0 M solution in THF, 0.224 ml, 0.224 mmol). The reaction mixture was then left to stir at r.t. After completion of the reaction as indicated by TLC, the solvent was removed under reduced pressure. To a solution of the crude resultant in DMF (2 ml) was added  $\text{Cs}_2\text{CO}_3$  (168.1 mg, 0.516 mmol). Then the resulting mixture was stirred at 90 °C. After completion of the reaction as indicated

by TLC, the reaction mixture was diluted with ethyl acetate, washed with brine, dried over anhydrous  $\text{Na}_2\text{SO}_4(\text{s})$ , filtered, and concentrated *in vacuo*. The residue was purified with silica-gel flash column chromatography to obtain desired product **18f** (51.02 mg, 79% yield, 69% overall yield) as a white solid.

$R_f = 0.4$  (DCM/MeOH = 20:1);  $^1\text{H}$  NMR (400 MHz, DMSO- $d_6$ )  $\delta$  7.98 (s, 1H), 7.34–7.23 (m, 6H), 4.84 (d,  $J = 11.7$  Hz, 1H), 4.71–4.59 (m, 3H), 4.47 (d,  $J = 15.3$  Hz, 1H), 4.33 (d,  $J = 15.7$  Hz, 1H), 4.19 (br s, 1H), 3.89 (d,  $J = 10.4$  Hz, 1H), 3.80 (t,  $J = 11.2$  Hz, 1H), 3.54 (br s, 1H), 3.38 (br s, 1H), 2.81 (s, 3H);  $^{13}\text{C}$  NMR (100 MHz, DMSO- $d_6$ )  $\delta$  165.0, 163.2, 153.5, 138.1, 128.4, 127.5, 127.0, 95.6, 62.0, 55.4, 40.2, 39.4; IR (neat)  $\nu_{\text{max}}$ : 3230, 2926, 1574, 1409, 1155, 736  $\text{cm}^{-1}$ ; HRMS(ESI+): Calcd for  $\text{C}_{17}\text{H}_{22}\text{N}_5\text{O}_3\text{S}^+$   $[\text{M}+\text{H}]^+$  376.1438, found 376.1437,  $\Delta\text{ppm} -0.27$ ; mp: 196–198  $^\circ\text{C}$ .

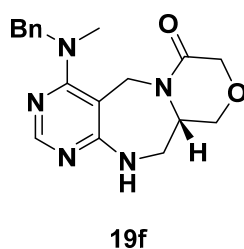

**Compound 19f.** A colorless oil;  $R_f = 0.5$  (DCM/MeOH = 20:1); 50.40 mg, 75% overall yield;  $^1\text{H}$  NMR (400 MHz,  $\text{CDCl}_3$ )  $\delta$  8.02 (s, 1H), 7.39–7.33 (m, 4H), 7.27–7.23 (m, 1H), 6.97 (m, 1H), 5.23 (d,  $J = 15.7$  Hz, 1H), 4.78, 4.41 (ABq,  $J_{\text{AB}} = 15.7$  Hz, 2H), 4.21, 4.12 (ABq,  $J_{\text{AB}} = 16.4$  Hz, 2H), 4.09–4.01 (m, 2H), 3.97–3.87 (m, 2H), 3.78 (t,  $J = 11.0$  Hz, 1H), 3.00 (dd,  $J = 15.3, 7.4$  Hz, 1H), 2.89 (s, 3H);  $^{13}\text{C}$  NMR (100 MHz,  $\text{CDCl}_3$ )  $\delta$  166.7, 166.5, 164.3, 154.7, 137.8, 128.5, 127.5, 127.1, 95.4, 67.7, 66.5, 57.5, 56.2, 42.2, 40.7, 39.1; IR (neat)  $\nu_{\text{max}}$ : 3237, 2908, 1653, 1573, 1408, 1119, 737  $\text{cm}^{-1}$ ; HRMS(ESI+): Calcd for  $\text{C}_{18}\text{H}_{22}\text{N}_5\text{O}_2^+$   $[\text{M}+\text{H}]^+$  340.1768, found 340.1765,  $\Delta\text{ppm} -0.88$ . The product was synthesized according to the synthetic procedure for the preparation of **18f** from **1e** and chloroacetic anhydride.

## Synthetic procedure for the preparation of 20f

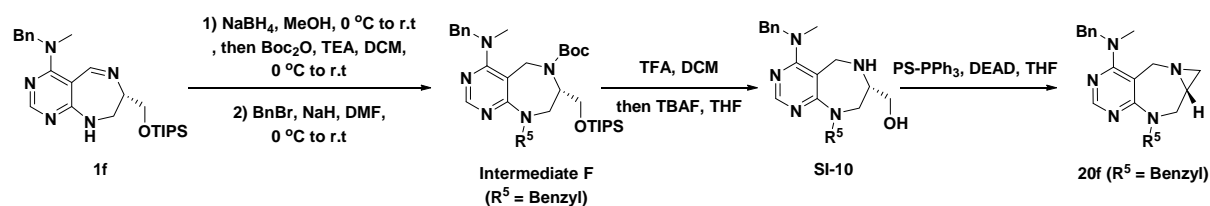

**Compound 20f.** To a stirring solution of **1f** (135.0 mg, 0.298 mmol) in MeOH (3.0 ml) was added NaBH<sub>4</sub> (56.37 mg, 1.490 mmol) at 0 °C. Then the resulting mixture was left to stir and allowed to warm to r.t. After the starting material was consumed as indicated by TLC, the resultant was quenched with saturated NaHCO<sub>3</sub>(aq) and extracted twice with DCM. The combined organic layer was dried over anhydrous Na<sub>2</sub>SO<sub>4</sub>(s) and filtered. The solvent was evaporated under reduced pressure, and the resulting crude secondary amine was dissolved in DCM (3.0 ml). To this solution were sequentially added Et<sub>3</sub>N (0.083 ml, 0.596 mmol) and Boc<sub>2</sub>O (84.55 mg, 0.387 mmol) at 0 °C. The resulting mixture was left to stir and allowed to warm to r.t. After completion of the reaction as indicated by TLC, the resultant was quenched with saturated NH<sub>4</sub>Cl(aq) and extracted twice with DCM. The combined organic layer was dried over anhydrous Na<sub>2</sub>SO<sub>4</sub>(s) and the filtrate was condensed under reduced pressure, followed by silica-gel flash column chromatography to afford the Boc-protected product (162.3 mg, 98% yield). To a solution of Boc-protected product (162.3 mg, 0.292 mmol) in DMF (3.0 ml) under argon atmosphere was added NaH (60% dispersion in mineral oil, 23.36 mg, 0.584 mmol) at 0 °C and left to stir. After 30 min, benzylbromide (0.052 ml, 0.438 mmol) was slowly added. The resulting mixture was left to stir and allowed to warm to r.t. After completion of the reaction as indicated by TLC, the reaction mixture was quenched with saturated NH<sub>4</sub>Cl(aq). The resultant was extracted twice with ethyl acetate, dried with anhydrous Na<sub>2</sub>SO<sub>4</sub>(s), filtered, and concentrated *in vacuo*. The residue was purified by silica-gel flash column chromatography to obtain the intermediate **F** (R<sup>5</sup> = benzyl, 164.1 mg, 87% yield). Intermediate **F** (164.1 mg, 0.254 mmol) was first treated with 10% trifluoroacetic acid (TFA) in DCM (12.5 ml) at r.t. After the starting material was consumed as indicated by TLC, any excess TFA was removed by azeotropic evaporation with toluene under reduced pressure. To a solution of the resulting Boc-deprotected product in THF (2.5 ml) was added TBAF (1.0 M solution in THF, 0.330 ml, 0.330 mmol) and the mixture was stirred at r.t. After completion of the reaction as indicated by

TLC, the reaction mixture was quenched with saturated NaHCO<sub>3</sub>(aq). The resultant was extracted twice with DCM, dried with anhydrous Na<sub>2</sub>SO<sub>4</sub>(s), filtered, and concentrated *in vacuo*, followed by silica-gel flash column chromatography to afford **SI-10** (73.21 mg, 74% yield). To a **SI-10** (73.21 mg, 0.188 mmol) in THF (20.0 ml) under argon atmosphere was added polymer-bound triphenylphosphine (587.5 mg, 0.94 mmol), purchased from Sigma-Aldrich (100-200 mesh, 1.6 mmol/g), and the mixture was stirred at r.t. After 30 min, diethyl azodicarboxylate (DEAD, 0.058 ml, 0.376 mmol) was slowly added. The mixture was stirred at r.t for 18h. The reaction mixture was filtered through Celite<sup>®</sup> while washing with DCM. The filtrate was condensed under reduced pressure and purified by silica-gel flash column chromatography to afford the desired product **20f** (R<sup>5</sup> = benzyl) (56.57 mg, 81% yield, 52% overall yield) as a pale yellow oil.

$R_f = 0.4$  (DCM/MeOH 20:1); <sup>1</sup>H NMR (400 MHz, CDCl<sub>3</sub>) δ 8.24 (s, 1H), 7.35–7.27 (m, 10H), 5.10, 4.88 (ABq,  $J_{AB} = 15.3$  Hz, 2H), 4.61, 4.39 (ABq,  $J_{AB} = 15.3$  Hz, 2H), 4.26 (d,  $J = 13.7$ , 1H), 4.09 (dd,  $J = 15.3, 11.3$  Hz, 1H), 3.58 (d,  $J = 13.7$ , 1H), 3.42 (dd,  $J = 15.5, 4.1$  Hz, 1H), 2.82 (s, 3H), 2.43 (m, 1H), 1.78 (d,  $J = 5.1$ , 1H), 1.30 (d,  $J = 3.1$ , 1H); <sup>13</sup>C NMR (100 MHz, CDCl<sub>3</sub>) δ 167.4, 163.8, 155.4, 138.8, 138.7, 128.7, 128.6, 127.8, 127.6, 127.3, 127.1, 100.3, 57.8, 53.9, 51.5, 48.7, 39.7, 34.4, 32.8; IR (neat)  $\nu_{max}$ : 3027, 2920, 2853, 1559, 1356, 735, 700 cm<sup>-1</sup>; HRMS(ESI<sup>+</sup>): Calcd for C<sub>23</sub>H<sub>26</sub>N<sub>5</sub><sup>+</sup> [M+H]<sup>+</sup> 372.2183, found 372.2189, Δppm +1.61.

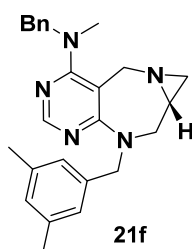

**Compound 21f** (R<sup>5</sup> = 3,5-dimethylbenzyl). A pale yellow oil;  $R_f = 0.5$  (DCM/MeOH = 20:1); 49.82 mg, 81% yield, 53% overall yield; <sup>1</sup>H NMR (500 MHz, CDCl<sub>3</sub>) δ 8.25 (s, 1H), 7.34–7.25 (m, 5H), 6.91 (m, 3H), 5.04, 4.78 (ABq,  $J_{AB} = 15.2$  Hz, 2H), 4.61, 4.38 (ABq,  $J_{AB} = 15.2$  Hz, 2H), 4.26 (d,  $J = 13.7$ , 1H), 4.04 (dd,  $J = 14.2, 11.7$  Hz, 1H), 3.57 (d,  $J = 13.7$ , 1H), 3.41 (dd,  $J = 15.4, 2.2$  Hz, 1H), 2.81 (s, 3H), 2.43 (m, 1H), 2.29 (s, 6H), 1.77 (d,  $J = 2.9$ , 1H), 1.28 (s, 1H); <sup>13</sup>C NMR (100 MHz, CDCl<sub>3</sub>) δ 167.4, 163.8, 155.4, 138.8, 138.6, 138.3, 129.0, 128.6, 127.8, 127.1, 125.4, 100.3, 57.9, 53.7, 51.5, 48.4, 39.7, 34.5, 32.7, 21.5; IR (neat)  $\nu_{max}$ : 3026,

2922, 2863, 1564, 1355, 735, 700  $\text{cm}^{-1}$ ; HRMS(ESI<sup>+</sup>): Calcd for  $\text{C}_{25}\text{H}_{30}\text{N}_5^+$   $[\text{M}+\text{H}]^+$  400.2496, found 400.2495,  $\Delta\text{ppm}$   $-0.25$ . The product was synthesized according to the synthetic procedure for the preparation of **20f** from **1f** and 3,5-dimethylbenzyl bromide.

### Synthetic procedure for the preparation of **22f**

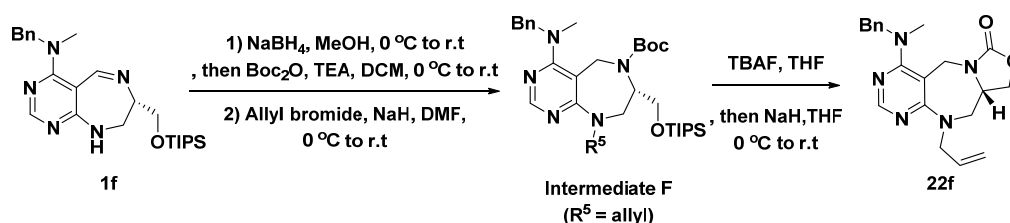

**Compound 22f.** To a stirring solution of **1f** (135.0 mg, 0.298 mmol) in MeOH (3.0 ml) was added  $\text{NaBH}_4$  (56.37 mg, 1.490 mmol) at  $0\text{ }^\circ\text{C}$ . Then the resulting mixture was left to stir and allowed to warm to r.t. After the starting material was consumed as indicated by TLC, the resultant was quenched with saturated  $\text{NaHCO}_3(\text{aq})$  and extracted twice with DCM. The combined organic layer was dried over anhydrous  $\text{Na}_2\text{SO}_4(\text{s})$  and filtered. The solvent was evaporated under reduced pressure, and the resulting crude secondary amine was dissolved in DCM (3.0 ml). To this solution were sequentially added  $\text{Et}_3\text{N}$  (0.083 ml, 0.596 mmol) and  $\text{Boc}_2\text{O}$  (84.55 mg, 0.387 mmol) at  $0\text{ }^\circ\text{C}$ . The resulting mixture was left to stir and allowed to warm to r.t. After completion of the reaction as indicated by TLC, the resultant was quenched with saturated  $\text{NH}_4\text{Cl}(\text{aq})$  and extracted twice with DCM. The combined organic layer was dried over anhydrous  $\text{Na}_2\text{SO}_4(\text{s})$  and the filtrate was condensed under reduced pressure, followed by silica-gel flash column chromatography to afford the Boc-protected product (162.3 mg, 98% yield). To a solution of Boc-protected product (162.3 mg, 0.292 mmol) in DMF (3.0 ml) under argon atmosphere was added NaH (60% dispersion in mineral oil, 23.36 mg, 0.584 mmol) at  $0\text{ }^\circ\text{C}$  and left to stir. After 30 min, allyl bromide (0.038 ml, 0.438 mmol) was slowly added. The resulting mixture was left to stir and allowed to warm to r.t. After completion of the reaction as indicated by TLC, the reaction mixture was quenched with saturated  $\text{NH}_4\text{Cl}(\text{aq})$ . The resultant was extracted twice with ethyl acetate, dried with anhydrous  $\text{Na}_2\text{SO}_4(\text{s})$ , filtered, and concentrated *in vacuo*. The residue was purified by silica-gel flash column chromatography

to obtain the intermediate **F** ( $R^5 = \text{allyl}$ , 141.2 mg, 81% yield). To a solution of intermediate **F** (141.2 mg, 0.237 mmol) in THF (2.5 ml) was added TBAF (1.0 M solution in THF, 0.308 ml, 0.308 mmol) and the mixture was stirred at r.t. After completion of the reaction as indicated by TLC, the reaction mixture was quenched with saturated  $\text{NaHCO}_3(\text{aq})$ . The resultant was extracted twice with DCM, dried with anhydrous  $\text{Na}_2\text{SO}_4(\text{s})$ , filtered, and concentrated *in vacuo*. To a solution of the crude resultant in THF (2.5 ml) under argon atmosphere was added NaH (60% dispersion in mineral oil, 14.22 mg, 0.356 mmol) at 0 °C. Then the resulting mixture was left to stir and allowed to warm to r.t. After completion of the reaction as indicated by TLC, the reaction mixture was diluted with DCM, washed with brine, dried over anhydrous  $\text{Na}_2\text{SO}_4(\text{s})$ , filtered, and concentrated *in vacuo*. The residue was purified with silica-gel flash column chromatography to obtain desired product **22f** (56.30 mg, 65% yield, 53% overall yield) as a white solid.

$R_f = 0.2$  (EA);  $^1\text{H NMR}$  (400 MHz,  $\text{CDCl}_3$ )  $\delta$  8.23 (s, 1H), 7.36–7.31 (m, 4H), 7.28 (m, 1H), 5.92 (m, 1H), 5.21 (d,  $J = 10.2$  Hz, 1H), 5.15 (dd,  $J = 17.2, 1.2$  Hz, 1H), 4.72–4.65 (m, 2H), 4.61 (dd,  $J = 15.5, 4.9$  Hz, 1H), 4.55–4.44 (m, 2H), 4.11–4.07 (m, 2H), 4.02 (d,  $J = 16.0$  Hz, 1H), 3.91 (dd,  $J = 15.5, 6.5$  Hz, 1H), 3.76 (dd,  $J = 14.9, 2.0$  Hz, 1H), 3.25 (dd,  $J = 15.1, 3.3$  Hz, 1H), 2.91 (s, 3H);  $^{13}\text{C NMR}$  (100 MHz,  $\text{CDCl}_3$ )  $\delta$  166.9, 164.9, 157.3, 155.0, 138.1, 134.2, 128.7, 127.9, 127.3, 117.8, 97.0, 65.1, 56.9, 56.7, 54.5, 52.4, 42.1, 39.7; IR (neat)  $\nu_{\text{max}}$ : 3049, 2976, 2917, 1758, 1561, 1410, 1266, 746  $\text{cm}^{-1}$ ; HRMS(ESI+): Calcd for  $\text{C}_{20}\text{H}_{24}\text{N}_5\text{O}_2^+$   $[\text{M}+\text{H}]^+$  366.1925, found 366.1924,  $\Delta_{\text{ppm}} -0.27$ ; mp: 89–91 °C.

## Synthetic procedure for the preparation of 23f

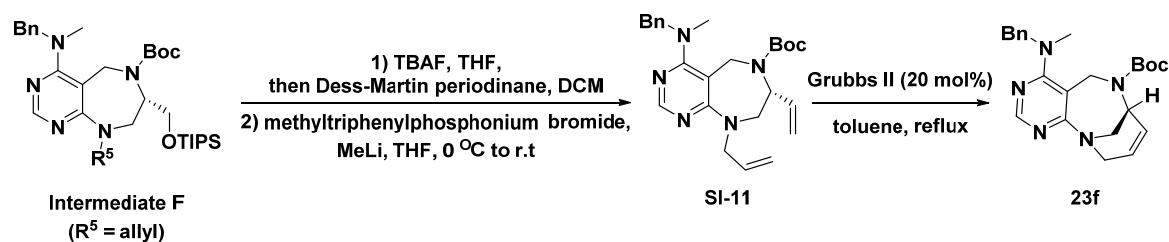

**Compound 23f.** To a solution of intermediate **F** ( $R^5 = \text{allyl}$ , 243.1 mg, 0.408 mmol) in THF (4.1 ml) was added TBAF (1.0 M solution in THF, 0.530 ml, 0.530 mmol) and the mixture was stirred at r.t. After completion of the reaction as indicated by TLC, the reaction mixture was quenched with saturated  $\text{NaHCO}_3(\text{aq})$ . The resultant was extracted twice with DCM, dried with anhydrous  $\text{Na}_2\text{SO}_4(\text{s})$ , filtered, and concentrated *in vacuo*. To a solution of the crude resultant in DCM (8.2 ml) was added Dess-Martin periodinane (259.6 mg, 0.612 mmol) and the mixture was stirred at r.t. After completion of the reaction as indicated by TLC, the reaction mixture was quenched with saturated  $\text{NaHCO}_3(\text{aq})$ . The resultant was extracted twice with DCM, dried with anhydrous  $\text{Na}_2\text{SO}_4(\text{s})$ , filtered, and concentrated *in vacuo*. The residue was purified by silica-gel flash column chromatography to obtain the aldehyde product (148.3 mg, 83% yield). To a stirring suspension of methyltriphenylphosphonium bromide (363.3 mg, 1.017 mmol) in THF under argon atmosphere was added MeLi (1.6 M in diethyl ether, 0.530 ml, 0.848 mmol) at 0 °C. After 30min, the resulting aldehyde product (148.3 mg, 0.339 mmol) was added. Then the reaction mixture was allowed to slowly warm to r.t over a 12 h period. The reaction mixture was quenched with saturated  $\text{NH}_4\text{Cl}(\text{aq})$ . The resultant was extracted twice with ethyl acetate, dried with anhydrous  $\text{Na}_2\text{SO}_4(\text{s})$ , filtered, and concentrated *in vacuo*, followed by silica-gel flash column chromatography to afford **SI-11** (130.0 mg, 88% yield). To a solution of **SI-11** (130.0 mg, 0.298 mmol) in toluene was added second generation Grubbs' catalyst (50.94 mg, 0.060 mmol, 20 mol%) and the mixture was left to stir at reflux. After 4h, solvent was removed under reduced pressure and the residue was purified by silica-gel flash column chromatography to obtain desired product **23f** (44.83 mg, 52% recovery yield, 31% overall yield) as a yellow oil.

$R_f = 0.2$  (hexane/EA = 1:1);  $^1\text{H NMR}$  (400 MHz,  $\text{DMSO}-d_6$ , 100 °C)  $\delta$  8.06 (s, 1H), 7.35–7.29 (m, 4H), 7.27–7.23 (m, 1H), 6.35 (ddd,  $J = 9.9, 5.3, 1.8$  Hz, 1H), 5.78 (ddd,  $J = 10.1, 3.9, 1.8$  Hz, 1H), 4.92 (d,  $J = 16.5$  Hz, 1H), 4.86–4.81 (m, 1H), 4.76 (d,  $J = 15.3$  Hz, 1H), 4.56 (d,  $J =$



15.9 Hz, 1H), 4.42 (dd,  $J = 15.3, 1.2$  Hz, 1H), 4.34 (d,  $J = 15.3$  Hz, 1H), 4.00 (dd,  $J = 4.9, 1.8$  Hz, 1H), 3.77 (dq,  $J = 18.3, 2.2$  Hz, 1H), 3.30 (dd,  $J = 15.3, 2.4$  Hz, 1H), 2.84 (s, 3H), 1.42 (s, 9H);  $^{13}\text{C}$  NMR (100 MHz, DMSO- $d_6$ , 100 °C)  $\delta$  166.0, 163.6, 154.6, 153.5, 137.9, 128.0, 127.7, 127.3, 127.1, 126.3, 99.7, 79.0, 55.4, 49.9, 49.4, 45.7, 41.9, 38.7, 27.7; IR (neat)  $\nu_{\text{max}}$ : 3031, 2978, 2928, 1690, 1588, 1408, 1164  $\text{cm}^{-1}$ ; HRMS(ESI+): Calcd for  $\text{C}_{23}\text{H}_{30}\text{N}_5\text{O}_2^+$   $[\text{M}+\text{H}]^+$  408.2394, found 408.2382,  $\Delta\text{ppm} -2.94$ .

### **3. General Information of Bioassay**

#### **Kits, reagents and materials**

Micro BCA™ protein assay kit was purchased from PIERCE and used for the measurement of protein concentration of cell lysate. Cell proliferation enzyme-linked immunosorbent assay (ELISA) and 5-bromo-2'-deoxyuridine (BrdU) colorimetric kit were purchased from Roche, Sigma-Aldrich. Ez-cytox WST-based cell viability, proliferation & cytotoxicity assay kit was purchased from Daeil Lab. Compounds used for bioassays were prepared in dimethyl sulfoxide (DMSO) solution. DMSO was purchased from Acros Organics. Tween® 20 was purchased from Sigma-Aldrich. Dulbecco modified eagle medium (DMEM), RPMI 1640, fetal bovine serum (FBS), and antibiotic-antimycotic solution were purchased from Gibco, Invitrogen. Phosphate-buffered saline (PBS) buffer and leucine-free DMEM were purchased from WELGENE. 3,3', 5,5"-tetramethylbenzidine (TMB), a substrate of horseradish peroxidase (HRP) conjugated in secondary antibody, was purchased from Invitrogen. Protein gel casters and western blot equipments including polyvinylidene difluoride (PVDF) membrane were purchased from Bio-Rad. Amersham ECL prime western blotting detection system (Amersham ECL prime solution) was purchased from GE Healthcare Life Science. 100-mm cell culture dish, transparent 96-well plate [#3598], and half-bottom 96 well clear plate [#3690] were purchased from CORNING. Lipofectamine™ 2000 reagent was purchased from Invitrogen. Human embryonic kidney (HEK)293T, DU145, Ca Ski, and HeLa cells were obtained from American Type Culture Collection [ATCC, VA, USA]. Nunc™ Lab-Tek™ II chambered cover glass was purchased from Thermo Scientific.

#### **Antibodies, plasmids and proteins**

Anti-LC3B (ab51520), anti-S6K1 (ab32359), anti-phospho-T389 S6K1 (ab2571), and HRP-labeled anti-horse IgG secondary antibodies (ab6802) were purchased from Abcam. Anti-glutathione-S-transferase (GST) antibody (sc-459) was purchased from Santa Cruz Biotechnology. Anti-p62 (CST 5114), anti-glyceraldehyde-3-phosphate dehydrogenase (GAPDH) (CST 2118), anti-phospho-S65 4E-BP1 (CST 9451), anti-phospho-S757 ULK1

(CST 6888), anti-phospho-S473 Akt (CST 4058), anti-phospho-T172 AMPK $\alpha$  (CST 2531), and HRP-labeled anti-rabbit IgG secondary antibodies (CST 7074) were purchased from Cell Signaling Technology. His-tagged LRS and GST-tagged RagD were in our laboratory stocks. mCherry-GFP-LC3 plasmid (pBabe vector) was from Dr. Heesun Cheong, Division of Chemical Biology, Research Institute, National Cancer Center, Korea.

### **Instruments and programs**

For developing of ELISA, the absorbance of 96-well plate was measured by BioTek Synergy HT Microplate reader. ChemiDoc<sup>TM</sup> MP imaging system from Bio-Rad was used for analyzing chemiluminescent signal in western blotting assay. Following signal quantification was done by ImageLab 4.0 program provided by Bio-Rad.

DeltaVision Elite imaging system from GE Healthcare was used for imaging experiment. Objective lenses were equipped with Olympus IX-71 inverted microscope with PLAN APO 60 $\times$ /Oil (PLAPON60 $\times$ O), 1.42 NA, WD 0.15 mm. sCMOS camera and InSightSSI fluorescence illumination module were equipped with the system. Four-color fluorescent protein (Live Cell) filter set [GE Healthcare, 52-852113-013] was used for imaging. For live cell imaging, CO<sub>2</sub> supporting chamber with an objective air heater were installed with the system. Images were analyzed with SoftWorks program supported by GE Healthcare. Graphs and figures provided were analyzed with GraphPad Prism 5 program.

## **4. Experimental Procedures of Biological Assays**

### **Cell Culture**

HEK293T cell was cultured in Dulbecco modified eagle medium (DMEM) with 10% (v/v) fetal bovine serum (FBS) and 1% (v/v) antibiotic-antimycotic solution. HeLa, DU145, and Ca Ski cell were cultured in RPMI 1640 medium with 10% (v/v) FBS and 1% antibiotic-antimycotic solution. Both cells were maintained in 100-mm cell culture dish in an incubator at 37 °C, in a humidified atmosphere with 5% CO<sub>2</sub>.

### **ELISA**

His-tagged human LRS were diluted in carbonate buffer (100 mM, pH 9.6) at the concentration of 0.5 ng  $\mu\text{l}^{-1}$ . Solution were distributed to the half-bottom 96 well clear plate from CORNING 3690. After incubation overnight at 4 °C (sealed), coating solution from each well was removed and washed for three times with phosphate buffered saline with 0.05% Tween<sup>®</sup> 20 (PBST). 5% bovine serum albumin (BSA) in PBS solution was treated to each well for blocking step, followed by the treatment of each compound and GST-tagged human RagD simultaneously for 3 h. GST protein itself was treated as negative control. Diluted GST antibody in PBST was added and incubated at room temperature for 1 h. After washing with PBST, the HRP-conjugated anti-horse IgG secondary antibody diluent was treated and incubated at room temperature for 1 h. TMB was added to each well for colorimetric development. Blue color should be developed in positive wells. To stop the color reaction, 1 M H<sub>3</sub>PO<sub>4</sub> stopping solution was added. Finally, absorbance at 450 nm were measured.

### **Western Blotting**

Cells were lysed with radio-immunoprecipitation assay (RIPA) buffer (50 mM Tris, pH 7.8, 150 mM NaCl, 0.5% deoxycholate, 1% IGEPAL CA-630, protease inhibitor cocktail, and phosphatase inhibitors). Protein was obtained after centrifugation at 15000 rpm for 20 min, by

transferring supernatant. Protein concentration was normalized with Micro BCA<sup>TM</sup> protein assay kit. Overall protein sampling procedure was done at 4 °C. Prepared protein samples were analyzed with SDS-PAGE and following western blot procedure. Protein was transferred into nitrocellulose membrane after SDS-PAGE experiment. Membrane was blocked with 2% BSA in TBST over 1 h on r.t. Primary antibodies were treated overnight at 4 °C [Anti-LC3B (ab51520); 1:1000, anti-S6K1 (ab32359); 1:1000, anti-phospho-T389 S6K1 (ab2571); 1:800, anti-p62 (CST 5114); 1:1000, anti-glyceraldehyde-3-phosphate dehydrogenase (GAPDH) (CST 2118); 1:1000, anti-phospho-S65 4E-BP1 (CST 9451); 1:1000, anti-phospho-S757 ULK1 (CST 6888); 1:800, anti-phospho-S473 Akt (CST 4058); 1: 1000, anti-phospho-T172 AMPK $\alpha$  (CST 2531)], followed by washing with TBST. HRP-labeled anti-rabbit IgG secondary antibody (1:5000) was treated at room temperature for 1 h. Antibodies were treated with the concentration indicated in antibody manufacturer's protocol. After washing with TBST, membrane was developed by Amersham ECL prime solution. Chemiluminescent signal was measured by ChemiDoc<sup>TM</sup> MP imaging system.

### **Surface Plasmon Resonance (SPR) Assay**

The dissociation rate constant ( $K_D$ ) toward His-LRS was determined by surface plasmon resonance (SPR) technique at the national center for inter-university research facilities (NCRF) in Seoul National University using a Biacore T100 instrument from GE Healthcare. The carboxyl group on the surface of CM5 sensor chip was replaced with reactive succinimide ester using combination of 1-ethyl-3-(3-dimethylaminopropyl)-carbodiimide (EDC) and *N*-hydroxysuccinimide (NHS) in flow cells 1 and 2. Human LRS (1.5 $\times$  PBS, pH 7.3) were immobilized on the flow cell 2 (aimed RU; 12000) through formation of amide bond by reacting with the resulting NHS ester. The remaining NHS ester on flow cells 1 and 2 was quenched by injection of 1 M ethanolamine-HCl (pH 8.0) solution. During the immobilization process, PBS was used as running buffer. After the immobilization of hLRS, compounds were injected for 60 s at a flow rate of 20  $\mu\text{l min}^{-1}$  in various concentration from 1  $\mu\text{M}$  to 15  $\mu\text{M}$ . At the same flow rate, dissociation of compounds from the sensor surface was monitored for 200s. As a running buffer, 1 $\times$  PBS (pH 7.3) containing 3% DMSO and 0.005% P20 solution were used. The binding events were measured at 25 °C. Data analysis were done by using Biacore

T100 Evaluation software from GE Healthcare. Final sensorgrams were obtained after the elimination of responses from flow cell 1 and buffer-only control. The dissociation constant ( $K_D$ ) was calculated by fitting the sensorgrams to the 1:1 binding model.

### **Transfection**

Cells were seeded in chambered coverglass from Nunc, 24 h prior to transfection. mCherry-GFP-LC3 plasmid was transfected to HeLa cell using Lipofectamine<sup>TM</sup> 2000 reagent. Transfection was preceded according to manufacturer's protocol.

### **mCherry-GFP-LC3 puncta imaging**

DeltaVision Elite imaging system was used for the imaging of mCherry-GFP-LC3 transfected HeLa cell. For live-cell imaging, chamber was maintained with 37 °C, 5% CO<sub>2</sub> condition. Image was obtained with 60× scale, using mCherry/mCherry, GFP/GFP (Excitation/Emission) filter sets. mCherry (Excitation: 575/25 nm, Emission: 625/45 nm); GFP (Excitation: 475/28 nm, Emission: 525/48 nm). Images were analyzed and merged with SoftWorks deconvolution software.

### **Cell proliferation assay**

HEK293T cells were seeded in transparent 96-well plate from CORNING. 24 h after seeding, leucine-free DMEM and compound-DMEM solution (final compound concentration of 5 μM) were treated in each well after the removal of culture media. Cell proliferation assay was done with WSTs assay and cell proliferation ELISA, BrdU (colorimetric) kit, following the manufacturer's protocol.

## Supplementary References

- (1) Baumann, M., Baxendale, I. R. An overview of the synthetic routes to the best selling drugs containing 6-membered heterocycles. *Beilstein J. Org. Chem.* **7**, 442–495 (2011).
- (2) Bauer, R. A., Wenderski, T. A. & Tan, D. S. Biomimetic diversity-oriented synthesis of benzannulated medium rings via ring expansion. *Nat. Chem. Biol.* **9**, 21–29 (2013).
- (3) Stojković, M. R., Piotrowski, P., Schmuck, C. & Piantanida, I. A short, rigid linker between pyrene and guanidiniocarbonyl-pyrrole induced a new set of spectroscopic responses to the ds-DNA secondary structure. *Org. Biomol. Chem.* **13**, 1629–1633 (2015).
- (4) Robichaud, A. J. *et al.* 3,4-Dihydropyrimido(1,2-*a*)indol-10(2H)-ones as potent non-peptidic inhibitors of caspase-3. *Bioorg. Med. Chem.* **17**, 7755–7768 (2009).
- (5) Han, G. *et al.* Modification of cap group in  $\delta$ -lactam-based histone deacetylase (HDAC) inhibitors. *Bioorg. Med. Chem. Lett.* **17**, 6234–6238 (2007).
